# Supplementary material for: Nurse Mentors to Advance Quality Improvement in Primary Health Centers: Lessons From a Pilot Program in Northern Karnataka, India
Source: PubMed Central journal article supplement (PMC4682589; doi:10.9745/ghsp-d-15-00142), 2015-12-15
Supplement: GHSP-D-15-00142_15-00142-Fischer-Supplementary-Material-Case-Sheets.pdf [file GHSP-D-15-00142_15-00142-Fischer-Supplementary-Material-Case-Sheets.pdf]

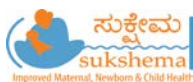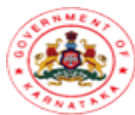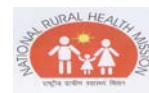

## MATERNAL AND NEWBORN CASE SHEET FOR USE AT 24x7 PHCs

Project Sukshema supports Karnataka to improve maternal, newborn and child health outcomes in rural populations through the development and adoption of effective operational and health system approaches within the NRHM. The project is implemented in the 8 districts of Northern Karnataka (Bagalkot, Bellary, Bidar, Bijapur, Gulbarga, Koppal, Raichur and Yadgir). The project is currently piloting an intervention in Bellary and Gulbarga districts to improve the quality of delivery and postpartum care at 24x7 PHCs by providing on site mentoring to the staff through a cadre of MNCH Mentors. As a part of the pilot, the project introduces this modified Case Sheet, along with 8 separate Complication Sheets for each of the most commonly diagnosed complications, as a job aid to the staff attending delivery. This job aid aims to help the PHC staff in providing a comprehensive and quality care to the woman during initial assessment, labour, delivery and immediate postpartum period and to the newborn. More specifically, it (1) reminds the sequence of the different steps to be followed at each stage (2) reminds the correct diagnosis of complications (3) reminds the appropriate procedures and drugs for the initial management of complications before referral and (4) facilitates easy and quick documentation for future audits for quality improvement.

### General instructions

1. Use ball point (black or blue) for recording on the Case Sheet.
2. Put a ✓ as appropriate on the boxes provided.
3. Use one case sheet for every woman over 20 weeks gestation visiting the PHC.
4. Read and follow the detailed instructions under each section and sub-section of the Case Sheet.
5. Read and record on all sections of the Case Sheet, either before or during or after an examination or a procedure.
6. Use all related Complication Case sheets if multiple complications are diagnosed.
7. Tear off the pink pages of this case sheet, staple them together with the Complication Sheet used, and send them to the facility where the woman/newborn is referred to.

**CASE SHEET FOR PREGNANT WOMEN GREATER THAN 20 WEEKS GESTATION**  
**SECTION 1: INITIAL ASSESSMENT**

| <b>A.FACILITY IDENTIFICATION</b>                                                                                                                                                                                                                                                                                                                                                                                                                                                                                                                                                                                                                                                         |                                                                                                                      |                                                                                                                                                                                                                                                                                                                                                                                                                                                                                                                                                                                                                                                                                                                                                                                                 |                                                                                                                                                                                                                              |                                                                                                                                                                                                                                                         |
|------------------------------------------------------------------------------------------------------------------------------------------------------------------------------------------------------------------------------------------------------------------------------------------------------------------------------------------------------------------------------------------------------------------------------------------------------------------------------------------------------------------------------------------------------------------------------------------------------------------------------------------------------------------------------------------|----------------------------------------------------------------------------------------------------------------------|-------------------------------------------------------------------------------------------------------------------------------------------------------------------------------------------------------------------------------------------------------------------------------------------------------------------------------------------------------------------------------------------------------------------------------------------------------------------------------------------------------------------------------------------------------------------------------------------------------------------------------------------------------------------------------------------------------------------------------------------------------------------------------------------------|------------------------------------------------------------------------------------------------------------------------------------------------------------------------------------------------------------------------------|---------------------------------------------------------------------------------------------------------------------------------------------------------------------------------------------------------------------------------------------------------|
| District _____                                                                                                                                                                                                                                                                                                                                                                                                                                                                                                                                                                                                                                                                           |                                                                                                                      | Taluka _____                                                                                                                                                                                                                                                                                                                                                                                                                                                                                                                                                                                                                                                                                                                                                                                    |                                                                                                                                                                                                                              | PHC Location _____                                                                                                                                                                                                                                      |
| <b>B.BACKGROUND INFORMATION</b>                                                                                                                                                                                                                                                                                                                                                                                                                                                                                                                                                                                                                                                          |                                                                                                                      |                                                                                                                                                                                                                                                                                                                                                                                                                                                                                                                                                                                                                                                                                                                                                                                                 |                                                                                                                                                                                                                              |                                                                                                                                                                                                                                                         |
| Name _____                                                                                                                                                                                                                                                                                                                                                                                                                                                                                                                                                                                                                                                                               |                                                                                                                      | Date of arrival                                                                                                                                                                                                                                                                                                                                                                                                                                                                                                                                                                                                                                                                                                                                                                                 |                                                                                                                                                                                                                              |                                                                                                                                                                                                                                                         |
| Husband's name _____                                                                                                                                                                                                                                                                                                                                                                                                                                                                                                                                                                                                                                                                     |                                                                                                                      | <div style="display: flex; justify-content: space-between;"> <span>day</span><span>month</span><span>year</span> </div> <input style="width: 20px; height: 20px; border: 1px solid black;" type="text"/> <input style="width: 20px; height: 20px; border: 1px solid black;" type="text"/> <input style="width: 20px; height: 20px; border: 1px solid black;" type="text"/> <input style="width: 20px; height: 20px; border: 1px solid black;" type="text"/> <input style="width: 20px; height: 20px; border: 1px solid black;" type="text"/> <input style="width: 20px; height: 20px; border: 1px solid black;" type="text"/>                                                                                                                                                                   |                                                                                                                                                                                                                              |                                                                                                                                                                                                                                                         |
| Age <input style="width: 20px; height: 20px; border: 1px solid black;" type="text"/> <input style="width: 20px; height: 20px; border: 1px solid black;" type="text"/> yrs                                                                                                                                                                                                                                                                                                                                                                                                                                                                                                                |                                                                                                                      | Time of arrival                                                                                                                                                                                                                                                                                                                                                                                                                                                                                                                                                                                                                                                                                                                                                                                 |                                                                                                                                                                                                                              |                                                                                                                                                                                                                                                         |
| BPL Y <input type="checkbox"/> N <input type="checkbox"/> Thai card available Y <input type="checkbox"/> N <input type="checkbox"/>                                                                                                                                                                                                                                                                                                                                                                                                                                                                                                                                                      |                                                                                                                      | <div style="display: flex; justify-content: space-between;"> <span>hrs</span><span>mins</span> </div> <input style="width: 20px; height: 20px; border: 1px solid black;" type="text"/> <input style="width: 20px; height: 20px; border: 1px solid black;" type="text"/>                                                                                                                                                                                                                                                                                                                                                                                                                                                                                                                         |                                                                                                                                                                                                                              |                                                                                                                                                                                                                                                         |
| Thai card number <input style="width: 20px; height: 20px; border: 1px solid black;" type="text"/> <input style="width: 20px; height: 20px; border: 1px solid black;" type="text"/> <input style="width: 20px; height: 20px; border: 1px solid black;" type="text"/> <input style="width: 20px; height: 20px; border: 1px solid black;" type="text"/> <input style="width: 20px; height: 20px; border: 1px solid black;" type="text"/> <input style="width: 20px; height: 20px; border: 1px solid black;" type="text"/> <input style="width: 20px; height: 20px; border: 1px solid black;" type="text"/> <input style="width: 20px; height: 20px; border: 1px solid black;" type="text"/> |                                                                                                                      | Date of initial assessment                                                                                                                                                                                                                                                                                                                                                                                                                                                                                                                                                                                                                                                                                                                                                                      |                                                                                                                                                                                                                              |                                                                                                                                                                                                                                                         |
| Address _____                                                                                                                                                                                                                                                                                                                                                                                                                                                                                                                                                                                                                                                                            |                                                                                                                      | <div style="display: flex; justify-content: space-between;"> <span>day</span><span>month</span><span>year</span> </div> <input style="width: 20px; height: 20px; border: 1px solid black;" type="text"/> <input style="width: 20px; height: 20px; border: 1px solid black;" type="text"/> <input style="width: 20px; height: 20px; border: 1px solid black;" type="text"/> <input style="width: 20px; height: 20px; border: 1px solid black;" type="text"/> <input style="width: 20px; height: 20px; border: 1px solid black;" type="text"/> <input style="width: 20px; height: 20px; border: 1px solid black;" type="text"/> <input style="width: 20px; height: 20px; border: 1px solid black;" type="text"/> <input style="width: 20px; height: 20px; border: 1px solid black;" type="text"/> |                                                                                                                                                                                                                              |                                                                                                                                                                                                                                                         |
|                                                                                                                                                                                                                                                                                                                                                                                                                                                                                                                                                                                                                                                                                          |                                                                                                                      | Time of initial assessment                                                                                                                                                                                                                                                                                                                                                                                                                                                                                                                                                                                                                                                                                                                                                                      |                                                                                                                                                                                                                              |                                                                                                                                                                                                                                                         |
|                                                                                                                                                                                                                                                                                                                                                                                                                                                                                                                                                                                                                                                                                          |                                                                                                                      | <div style="display: flex; justify-content: space-between;"> <span>hrs</span><span>mins</span> </div> <input style="width: 20px; height: 20px; border: 1px solid black;" type="text"/> <input style="width: 20px; height: 20px; border: 1px solid black;" type="text"/>                                                                                                                                                                                                                                                                                                                                                                                                                                                                                                                         |                                                                                                                                                                                                                              |                                                                                                                                                                                                                                                         |
|                                                                                                                                                                                                                                                                                                                                                                                                                                                                                                                                                                                                                                                                                          |                                                                                                                      | Contact number <input style="width: 20px; height: 20px; border: 1px solid black;" type="text"/> <input style="width: 20px; height: 20px; border: 1px solid black;" type="text"/> <input style="width: 20px; height: 20px; border: 1px solid black;" type="text"/> <input style="width: 20px; height: 20px; border: 1px solid black;" type="text"/> <input style="width: 20px; height: 20px; border: 1px solid black;" type="text"/> <input style="width: 20px; height: 20px; border: 1px solid black;" type="text"/> <input style="width: 20px; height: 20px; border: 1px solid black;" type="text"/> <input style="width: 20px; height: 20px; border: 1px solid black;" type="text"/>                                                                                                          |                                                                                                                                                                                                                              |                                                                                                                                                                                                                                                         |
| <b>C. PRESENTING COMPLAINTS ( Put a ✓ on Y box if present and a ✓ on N box if not present, for each complaint)</b>                                                                                                                                                                                                                                                                                                                                                                                                                                                                                                                                                                       |                                                                                                                      |                                                                                                                                                                                                                                                                                                                                                                                                                                                                                                                                                                                                                                                                                                                                                                                                 |                                                                                                                                                                                                                              |                                                                                                                                                                                                                                                         |
| Fever Y <input type="checkbox"/> N <input type="checkbox"/>                                                                                                                                                                                                                                                                                                                                                                                                                                                                                                                                                                                                                              |                                                                                                                      | Breathlessness at rest or on mild exertion Y <input type="checkbox"/> N <input type="checkbox"/>                                                                                                                                                                                                                                                                                                                                                                                                                                                                                                                                                                                                                                                                                                |                                                                                                                                                                                                                              |                                                                                                                                                                                                                                                         |
| Swelling of face Y <input type="checkbox"/> N <input type="checkbox"/>                                                                                                                                                                                                                                                                                                                                                                                                                                                                                                                                                                                                                   |                                                                                                                      | Pain in abdomen Y <input type="checkbox"/> N <input type="checkbox"/>                                                                                                                                                                                                                                                                                                                                                                                                                                                                                                                                                                                                                                                                                                                           |                                                                                                                                                                                                                              |                                                                                                                                                                                                                                                         |
| Headache Y <input type="checkbox"/> N <input type="checkbox"/>                                                                                                                                                                                                                                                                                                                                                                                                                                                                                                                                                                                                                           |                                                                                                                      | Contractions Y <input type="checkbox"/> N <input type="checkbox"/>                                                                                                                                                                                                                                                                                                                                                                                                                                                                                                                                                                                                                                                                                                                              |                                                                                                                                                                                                                              |                                                                                                                                                                                                                                                         |
| Blurred vision Y <input type="checkbox"/> N <input type="checkbox"/>                                                                                                                                                                                                                                                                                                                                                                                                                                                                                                                                                                                                                     |                                                                                                                      | Watery discharge per vagina/rupture of membranes Y <input type="checkbox"/> N <input type="checkbox"/>                                                                                                                                                                                                                                                                                                                                                                                                                                                                                                                                                                                                                                                                                          |                                                                                                                                                                                                                              |                                                                                                                                                                                                                                                         |
| Vomiting Y <input type="checkbox"/> N <input type="checkbox"/>                                                                                                                                                                                                                                                                                                                                                                                                                                                                                                                                                                                                                           |                                                                                                                      | Bleeding per vagina Y <input type="checkbox"/> N <input type="checkbox"/>                                                                                                                                                                                                                                                                                                                                                                                                                                                                                                                                                                                                                                                                                                                       |                                                                                                                                                                                                                              |                                                                                                                                                                                                                                                         |
| Fits/seizures Y <input type="checkbox"/> N <input type="checkbox"/>                                                                                                                                                                                                                                                                                                                                                                                                                                                                                                                                                                                                                      |                                                                                                                      | Foul discharge per vagina Y <input type="checkbox"/> N <input type="checkbox"/>                                                                                                                                                                                                                                                                                                                                                                                                                                                                                                                                                                                                                                                                                                                 |                                                                                                                                                                                                                              |                                                                                                                                                                                                                                                         |
| Difficulty in passing urine/ less urine Y <input type="checkbox"/> N <input type="checkbox"/>                                                                                                                                                                                                                                                                                                                                                                                                                                                                                                                                                                                            |                                                                                                                      | Decreased / No foetal movement Y <input type="checkbox"/> N <input type="checkbox"/>                                                                                                                                                                                                                                                                                                                                                                                                                                                                                                                                                                                                                                                                                                            |                                                                                                                                                                                                                              |                                                                                                                                                                                                                                                         |
| Palpitation Y <input type="checkbox"/> N <input type="checkbox"/>                                                                                                                                                                                                                                                                                                                                                                                                                                                                                                                                                                                                                        |                                                                                                                      | Any other (specify) _____                                                                                                                                                                                                                                                                                                                                                                                                                                                                                                                                                                                                                                                                                                                                                                       |                                                                                                                                                                                                                              |                                                                                                                                                                                                                                                         |
| Severe weakness / tiredness Y <input type="checkbox"/> N <input type="checkbox"/>                                                                                                                                                                                                                                                                                                                                                                                                                                                                                                                                                                                                        |                                                                                                                      |                                                                                                                                                                                                                                                                                                                                                                                                                                                                                                                                                                                                                                                                                                                                                                                                 |                                                                                                                                                                                                                              |                                                                                                                                                                                                                                                         |
| <b>D. MENSTRUAL AND OBSTETRIC HISTORY (Ask the woman and/or refer to Thai Card)</b>                                                                                                                                                                                                                                                                                                                                                                                                                                                                                                                                                                                                      |                                                                                                                      |                                                                                                                                                                                                                                                                                                                                                                                                                                                                                                                                                                                                                                                                                                                                                                                                 |                                                                                                                                                                                                                              |                                                                                                                                                                                                                                                         |
| G <input type="checkbox"/> P <input type="checkbox"/> A <input type="checkbox"/> L <input type="checkbox"/>                                                                                                                                                                                                                                                                                                                                                                                                                                                                                                                                                                              |                                                                                                                      | Cycles Regular <input type="checkbox"/> Irregular <input type="checkbox"/>                                                                                                                                                                                                                                                                                                                                                                                                                                                                                                                                                                                                                                                                                                                      |                                                                                                                                                                                                                              | Length of the cycle <input style="width: 20px; height: 20px; border: 1px solid black;" type="text"/> <input style="width: 20px; height: 20px; border: 1px solid black;" type="text"/> days                                                              |
| LMP day <input style="width: 20px; height: 20px; border: 1px solid black;" type="text"/> <input style="width: 20px; height: 20px; border: 1px solid black;" type="text"/>                                                                                                                                                                                                                                                                                                                                                                                                                                                                                                                |                                                                                                                      | month <input style="width: 20px; height: 20px; border: 1px solid black;" type="text"/> <input style="width: 20px; height: 20px; border: 1px solid black;" type="text"/>                                                                                                                                                                                                                                                                                                                                                                                                                                                                                                                                                                                                                         |                                                                                                                                                                                                                              | year <input style="width: 20px; height: 20px; border: 1px solid black;" type="text"/> <input style="width: 20px; height: 20px; border: 1px solid black;" type="text"/> <input style="width: 20px; height: 20px; border: 1px solid black;" type="text"/> |
| EDD day <input style="width: 20px; height: 20px; border: 1px solid black;" type="text"/> <input style="width: 20px; height: 20px; border: 1px solid black;" type="text"/>                                                                                                                                                                                                                                                                                                                                                                                                                                                                                                                |                                                                                                                      | month <input style="width: 20px; height: 20px; border: 1px solid black;" type="text"/> <input style="width: 20px; height: 20px; border: 1px solid black;" type="text"/>                                                                                                                                                                                                                                                                                                                                                                                                                                                                                                                                                                                                                         |                                                                                                                                                                                                                              | year <input style="width: 20px; height: 20px; border: 1px solid black;" type="text"/> <input style="width: 20px; height: 20px; border: 1px solid black;" type="text"/> <input style="width: 20px; height: 20px; border: 1px solid black;" type="text"/> |
| Gestational age <input style="width: 20px; height: 20px; border: 1px solid black;" type="text"/> <input style="width: 20px; height: 20px; border: 1px solid black;" type="text"/> wks <input style="width: 20px; height: 20px; border: 1px solid black;" type="text"/> <input style="width: 20px; height: 20px; border: 1px solid black;" type="text"/> days                                                                                                                                                                                                                                                                                                                             |                                                                                                                      | Gestational type Single pregnancy <input type="checkbox"/> Multiples <input type="checkbox"/>                                                                                                                                                                                                                                                                                                                                                                                                                                                                                                                                                                                                                                                                                                   |                                                                                                                                                                                                                              |                                                                                                                                                                                                                                                         |
| # of ANC checkups (Record '00' if none) <input style="width: 20px; height: 20px; border: 1px solid black;" type="text"/> <input style="width: 20px; height: 20px; border: 1px solid black;" type="text"/>                                                                                                                                                                                                                                                                                                                                                                                                                                                                                |                                                                                                                      |                                                                                                                                                                                                                                                                                                                                                                                                                                                                                                                                                                                                                                                                                                                                                                                                 |                                                                                                                                                                                                                              |                                                                                                                                                                                                                                                         |
| <b>E.PREVIOUS OBSTETRIC HISTORY (Record particulars for each pregnancy outcome in separate lines. If primigravida, skip to section F)</b>                                                                                                                                                                                                                                                                                                                                                                                                                                                                                                                                                |                                                                                                                      |                                                                                                                                                                                                                                                                                                                                                                                                                                                                                                                                                                                                                                                                                                                                                                                                 |                                                                                                                                                                                                                              |                                                                                                                                                                                                                                                         |
| Year of delivery/abortion                                                                                                                                                                                                                                                                                                                                                                                                                                                                                                                                                                                                                                                                | Mode of delivery (Record NORMAL, INSTRUMENTAL, CAESAREAN, SPONTANEOUS ABORTION, or MEDICAL TERMINATION OF PREGNANCY) | Place of delivery/MTP (Record SC, PHC, CHC, TH, DH, PVT, HOME, or OTHER)                                                                                                                                                                                                                                                                                                                                                                                                                                                                                                                                                                                                                                                                                                                        | Complications during pregnancy/delivery/postpartum (Record NONE, APH, PIH, PRE-ECLAMPSIA, ECLAMPSIA, PRE-TERM LABOUR, PRE-TERM RUPTURE OF MEMBRANES, FOETAL DISTRESS, ABNORMAL PRESENTATION, FEVER, PPH, and OTHER (specify) | Outcome (Record ABORTION, STILL BIRTH, LIVE BIRTH, NEONATAL DEATH, INFANT DEATH)                                                                                                                                                                        |
|                                                                                                                                                                                                                                                                                                                                                                                                                                                                                                                                                                                                                                                                                          |                                                                                                                      |                                                                                                                                                                                                                                                                                                                                                                                                                                                                                                                                                                                                                                                                                                                                                                                                 |                                                                                                                                                                                                                              |                                                                                                                                                                                                                                                         |
|                                                                                                                                                                                                                                                                                                                                                                                                                                                                                                                                                                                                                                                                                          |                                                                                                                      |                                                                                                                                                                                                                                                                                                                                                                                                                                                                                                                                                                                                                                                                                                                                                                                                 |                                                                                                                                                                                                                              |                                                                                                                                                                                                                                                         |
|                                                                                                                                                                                                                                                                                                                                                                                                                                                                                                                                                                                                                                                                                          |                                                                                                                      |                                                                                                                                                                                                                                                                                                                                                                                                                                                                                                                                                                                                                                                                                                                                                                                                 |                                                                                                                                                                                                                              |                                                                                                                                                                                                                                                         |
|                                                                                                                                                                                                                                                                                                                                                                                                                                                                                                                                                                                                                                                                                          |                                                                                                                      |                                                                                                                                                                                                                                                                                                                                                                                                                                                                                                                                                                                                                                                                                                                                                                                                 |                                                                                                                                                                                                                              |                                                                                                                                                                                                                                                         |
|                                                                                                                                                                                                                                                                                                                                                                                                                                                                                                                                                                                                                                                                                          |                                                                                                                      |                                                                                                                                                                                                                                                                                                                                                                                                                                                                                                                                                                                                                                                                                                                                                                                                 |                                                                                                                                                                                                                              |                                                                                                                                                                                                                                                         |
|                                                                                                                                                                                                                                                                                                                                                                                                                                                                                                                                                                                                                                                                                          |                                                                                                                      |                                                                                                                                                                                                                                                                                                                                                                                                                                                                                                                                                                                                                                                                                                                                                                                                 |                                                                                                                                                                                                                              |                                                                                                                                                                                                                                                         |
|                                                                                                                                                                                                                                                                                                                                                                                                                                                                                                                                                                                                                                                                                          |                                                                                                                      |                                                                                                                                                                                                                                                                                                                                                                                                                                                                                                                                                                                                                                                                                                                                                                                                 |                                                                                                                                                                                                                              |                                                                                                                                                                                                                                                         |
|                                                                                                                                                                                                                                                                                                                                                                                                                                                                                                                                                                                                                                                                                          |                                                                                                                      |                                                                                                                                                                                                                                                                                                                                                                                                                                                                                                                                                                                                                                                                                                                                                                                                 |                                                                                                                                                                                                                              |                                                                                                                                                                                                                                                         |
|                                                                                                                                                                                                                                                                                                                                                                                                                                                                                                                                                                                                                                                                                          |                                                                                                                      |                                                                                                                                                                                                                                                                                                                                                                                                                                                                                                                                                                                                                                                                                                                                                                                                 |                                                                                                                                                                                                                              |                                                                                                                                                                                                                                                         |
|                                                                                                                                                                                                                                                                                                                                                                                                                                                                                                                                                                                                                                                                                          |                                                                                                                      |                                                                                                                                                                                                                                                                                                                                                                                                                                                                                                                                                                                                                                                                                                                                                                                                 |                                                                                                                                                                                                                              |                                                                                                                                                                                                                                                         |
|                                                                                                                                                                                                                                                                                                                                                                                                                                                                                                                                                                                                                                                                                          |                                                                                                                      |                                                                                                                                                                                                                                                                                                                                                                                                                                                                                                                                                                                                                                                                                                                                                                                                 |                                                                                                                                                                                                                              |                                                                                                                                                                                                                                                         |
|                                                                                                                                                                                                                                                                                                                                                                                                                                                                                                                                                                                                                                                                                          |                                                                                                                      |                                                                                                                                                                                                                                                                                                                                                                                                                                                                                                                                                                                                                                                                                                                                                                                                 |                                                                                                                                                                                                                              |                                                                                                                                                                                                                                                         |
|                                                                                                                                                                                                                                                                                                                                                                                                                                                                                                                                                                                                                                                                                          |                                                                                                                      |                                                                                                                                                                                                                                                                                                                                                                                                                                                                                                                                                                                                                                                                                                                                                                                                 |                                                                                                                                                                                                                              |                                                                                                                                                                                                                                                         |
|                                                                                                                                                                                                                                                                                                                                                                                                                                                                                                                                                                                                                                                                                          |                                                                                                                      |                                                                                                                                                                                                                                                                                                                                                                                                                                                                                                                                                                                                                                                                                                                                                                                                 |                                                                                                                                                                                                                              |                                                                                                                                                                                                                                                         |
|                                                                                                                                                                                                                                                                                                                                                                                                                                                                                                                                                                                                                                                                                          |                                                                                                                      |                                                                                                                                                                                                                                                                                                                                                                                                                                                                                                                                                                                                                                                                                                                                                                                                 |                                                                                                                                                                                                                              |                                                                                                                                                                                                                                                         |
| <b>F. OTHER HISTORY</b>                                                                                                                                                                                                                                                                                                                                                                                                                                                                                                                                                                                                                                                                  |                                                                                                                      |                                                                                                                                                                                                                                                                                                                                                                                                                                                                                                                                                                                                                                                                                                                                                                                                 |                                                                                                                                                                                                                              |                                                                                                                                                                                                                                                         |
| Medical history Diabetes Y <input type="checkbox"/> N <input type="checkbox"/> Anaemia Y <input type="checkbox"/> N <input type="checkbox"/>                                                                                                                                                                                                                                                                                                                                                                                                                                                                                                                                             |                                                                                                                      | Medications during this pregnancy                                                                                                                                                                                                                                                                                                                                                                                                                                                                                                                                                                                                                                                                                                                                                               |                                                                                                                                                                                                                              |                                                                                                                                                                                                                                                         |
| Hypertension Y <input type="checkbox"/> N <input type="checkbox"/> Heart disease Y <input type="checkbox"/> N <input type="checkbox"/> Other Y <input type="checkbox"/> N <input type="checkbox"/> (specify) _____                                                                                                                                                                                                                                                                                                                                                                                                                                                                       |                                                                                                                      | Injection TT given 1 <input type="checkbox"/> 2 <input type="checkbox"/> Booster <input type="checkbox"/> None <input type="checkbox"/>                                                                                                                                                                                                                                                                                                                                                                                                                                                                                                                                                                                                                                                         |                                                                                                                                                                                                                              |                                                                                                                                                                                                                                                         |
| Surgical history _____                                                                                                                                                                                                                                                                                                                                                                                                                                                                                                                                                                                                                                                                   |                                                                                                                      | Taking any medications Yes <input type="checkbox"/> No <input type="checkbox"/> If yes, IFA <input type="checkbox"/>                                                                                                                                                                                                                                                                                                                                                                                                                                                                                                                                                                                                                                                                            |                                                                                                                                                                                                                              |                                                                                                                                                                                                                                                         |
| Any allergies Y <input type="checkbox"/> N <input type="checkbox"/> If yes, specify _____                                                                                                                                                                                                                                                                                                                                                                                                                                                                                                                                                                                                |                                                                                                                      | Other <input type="checkbox"/> (specify) _____                                                                                                                                                                                                                                                                                                                                                                                                                                                                                                                                                                                                                                                                                                                                                  |                                                                                                                                                                                                                              |                                                                                                                                                                                                                                                         |

| G. INVESTIGATIONS DONE DURING THE CURRENT PREGNANCY (Record Y or N if the test is already done, based on the Thai Card/ self report. For each test, record the results and date in respective columns. Determine if tests need to be done/ repeated and record the test results) |                                                       |      |        |                                                       |        |
|----------------------------------------------------------------------------------------------------------------------------------------------------------------------------------------------------------------------------------------------------------------------------------|-------------------------------------------------------|------|--------|-------------------------------------------------------|--------|
| Test                                                                                                                                                                                                                                                                             | Already done                                          | Date | Result | Done today                                            | Result |
| Haemoglobin                                                                                                                                                                                                                                                                      | Y <input type="checkbox"/> N <input type="checkbox"/> |      |        | Y <input type="checkbox"/> N <input type="checkbox"/> |        |
| Blood group/Rh                                                                                                                                                                                                                                                                   | Y <input type="checkbox"/> N <input type="checkbox"/> |      |        | Y <input type="checkbox"/> N <input type="checkbox"/> |        |
| RPR/VDRL                                                                                                                                                                                                                                                                         | Y <input type="checkbox"/> N <input type="checkbox"/> |      |        | Y <input type="checkbox"/> N <input type="checkbox"/> |        |
| HIV                                                                                                                                                                                                                                                                              | Y <input type="checkbox"/> N <input type="checkbox"/> |      |        | Y <input type="checkbox"/> N <input type="checkbox"/> |        |
| HbsAg                                                                                                                                                                                                                                                                            | Y <input type="checkbox"/> N <input type="checkbox"/> |      |        | Y <input type="checkbox"/> N <input type="checkbox"/> |        |
| Urine for protein                                                                                                                                                                                                                                                                | Y <input type="checkbox"/> N <input type="checkbox"/> |      |        | Y <input type="checkbox"/> N <input type="checkbox"/> |        |
| Urine for detection of infection                                                                                                                                                                                                                                                 | Y <input type="checkbox"/> N <input type="checkbox"/> |      |        | Y <input type="checkbox"/> N <input type="checkbox"/> |        |
| Oral glucose tolerance test                                                                                                                                                                                                                                                      | Y <input type="checkbox"/> N <input type="checkbox"/> |      |        | Y <input type="checkbox"/> N <input type="checkbox"/> |        |
| Ultrasound                                                                                                                                                                                                                                                                       | Y <input type="checkbox"/> N <input type="checkbox"/> |      |        | Y <input type="checkbox"/> N <input type="checkbox"/> |        |
| Other _____                                                                                                                                                                                                                                                                      | Y <input type="checkbox"/> N <input type="checkbox"/> |      |        | Y <input type="checkbox"/> N <input type="checkbox"/> |        |

**H. EXAMINATION**

**General Examination**  
 Weight   kgs Height    cms Pulse    beats/min  
 Blood pressure    /    mmHg Temperature   °C Pallor Y  N  Oedema Y  N   
 Jaundice Y  N  Lungs clear Y  N  Heart sounds normal Y  N  Any murmurs/additional sounds Y  N

**Abdominal examination**  
 Fundal height   wks Presentation Cephalic  Transverse  Breech  Other   
 Contractions present Y  N  If yes, record date and time of start \_\_\_\_\_ AND frequency  Number per 10 mins AND Intensity Mild (<20 secs)  Moderate (20-40 secs)  Strong (>40 secs)   
 Is uterus tender? Y  N  Previous caesarean scar Y  N  If yes, type Vertical  Transverse  Unsure   
 FHR    beats/min Other findings \_\_\_\_\_

**Vaginal examination** (DO NOT perform PV examination (a) if membranes are ruptured and the woman is not in labour or (b) if she has antepartum bleeding and the placental location is not known or if placenta is known to be praevia or low-lying)  
 Cervical dilatation   cms Cervical effacement   % Status of membranes Intact  Ruptured   
 If ruptured, record date and time of rupture \_\_\_\_\_  
 Amniotic fluid visible Y  N  If yes, colour of amniotic fluid Clear  Bloody  Meconium stained   
 Is there a purulent vaginal discharge? Y  N   
 Presenting part Vertex  Breech  Shoulder  Cord  Other  Station of presenting part    
 Time when examinations were complete   hrs   mins Pelvic adequate Y  N

**I. OVERALL INITIAL ASSESSMENT (Tick a, b, c, d, e or f. Tick all complications observed)**

- |                                                                                                                                   |                                                     |
|-----------------------------------------------------------------------------------------------------------------------------------|-----------------------------------------------------|
| a. Woman not in labour, died <input type="checkbox"/>                                                                             | } → Complete Outcomes Sheet and other documentation |
| b. Woman in labour, died <input type="checkbox"/>                                                                                 |                                                     |
| c. Woman not in labour, no complications <input type="checkbox"/>                                                                 | → Send home                                         |
| d. Woman in labour, no complications <input type="checkbox"/>                                                                     | → Admit and go to the next section of Case Sheet    |
| e. Woman not in labour, with complications <input type="checkbox"/>                                                               |                                                     |
| Rupture of membranes > 12 hrs <input type="checkbox"/>                                                                            | → Manage and refer using Complication Sheet A       |
| Pregnancy induced hypertension <input type="checkbox"/> Pre-eclampsia <input type="checkbox"/> Eclampsia <input type="checkbox"/> | → Manage and refer using Complication Sheet B       |
| Antepartum haemorrhage with or without shock <input type="checkbox"/>                                                             | → Manage and refer using Complication Sheet C       |
| Infection with or without shock <input type="checkbox"/>                                                                          | → Manage and refer using Complication Sheet D       |
| Preterm rupture of membranes without preterm labour <input type="checkbox"/>                                                      | → Manage and refer using Complication Sheet E       |
| Severe Anaemia <input type="checkbox"/> Foetal distress <input type="checkbox"/> No foetal movement <input type="checkbox"/>      | } → Refer using Complication Sheet H                |
| Other <input type="checkbox"/> (specify) _____                                                                                    |                                                     |
| f. Woman in labour, with complications <input type="checkbox"/>                                                                   |                                                     |
| Rupture of membranes > 12 hrs <input type="checkbox"/>                                                                            | → Manage and refer using Complication Sheet A       |
| Pregnancy induced hypertension <input type="checkbox"/> Pre-eclampsia <input type="checkbox"/> Eclampsia <input type="checkbox"/> | → Manage and refer using Complication Sheet B       |
| Antepartum haemorrhage with or without shock <input type="checkbox"/>                                                             | → Manage and refer using Complication Sheet C       |
| Infection with or without shock <input type="checkbox"/>                                                                          | → Manage and refer using Complication Sheet D       |
| Preterm labour with or without premature rupture of membranes <input type="checkbox"/>                                            | → Manage and refer using Complication Sheet E       |
| Severe Anaemia <input type="checkbox"/> Foetal distress <input type="checkbox"/> No foetal movement <input type="checkbox"/>      | } → Refer using Complication Sheet H                |
| Mal-presentation <input type="checkbox"/> Other <input type="checkbox"/> (specify) _____                                          |                                                     |

Date diagnosis made       Time diagnosis made   hrs   mins  
 Diagnosed by SN  MO  Other  Was woman admitted? Y  N  Time of admission   hrs   mins  
 Registration #       Name of the staff \_\_\_\_\_ Signature \_\_\_\_\_

**SECTION 2: LABOUR MONITORING**

|                                                                                                                                                                                                                           |  |  |  |  |  |  |  |  |  |  |  |  |
|---------------------------------------------------------------------------------------------------------------------------------------------------------------------------------------------------------------------------|--|--|--|--|--|--|--|--|--|--|--|--|
| <b>A. LATENT PHASE</b> (Start recording as soon as the woman is in labour and dilatation is < 4 cms. Each box corresponds to 60 mins. Record time in hours and minutes corresponding to observation)                      |  |  |  |  |  |  |  |  |  |  |  |  |
| Measure and record foetal heart rate every hour and record the time and the readings below                                                                                                                                |  |  |  |  |  |  |  |  |  |  |  |  |
| Time (hrs and mins)                                                                                                                                                                                                       |  |  |  |  |  |  |  |  |  |  |  |  |
| FHR (beats per min)                                                                                                                                                                                                       |  |  |  |  |  |  |  |  |  |  |  |  |
| Measure the following once every 4 hours and record the time and readings.                                                                                                                                                |  |  |  |  |  |  |  |  |  |  |  |  |
| Cervical dilatation (cms)                                                                                                                                                                                                 |  |  |  |  |  |  |  |  |  |  |  |  |
| Maternal pulse (beats per min)                                                                                                                                                                                            |  |  |  |  |  |  |  |  |  |  |  |  |
| Blood pressure (mmHg)                                                                                                                                                                                                     |  |  |  |  |  |  |  |  |  |  |  |  |
| Temperature (Celsius)                                                                                                                                                                                                     |  |  |  |  |  |  |  |  |  |  |  |  |
| <b>B. ACTIVE PHASE</b> (Start at 4 cms or more dilatation and record all values. Each box corresponds to 30 mins. Record time in hours and minutes corresponding to observation. Plot all these values on the partograph) |  |  |  |  |  |  |  |  |  |  |  |  |
| Measure and record maternal BP, temperature and dilatation every 4 hours or more if necessary. Record everything else half hourly                                                                                         |  |  |  |  |  |  |  |  |  |  |  |  |
| Time (hrs and mins)                                                                                                                                                                                                       |  |  |  |  |  |  |  |  |  |  |  |  |
| Cervical dilatation (cms)                                                                                                                                                                                                 |  |  |  |  |  |  |  |  |  |  |  |  |
| Contractions per 10 mins                                                                                                                                                                                                  |  |  |  |  |  |  |  |  |  |  |  |  |
| Contractions duration (secs)                                                                                                                                                                                              |  |  |  |  |  |  |  |  |  |  |  |  |
| Maternal pulse (beats per min)                                                                                                                                                                                            |  |  |  |  |  |  |  |  |  |  |  |  |
| Blood pressure (mmHg)                                                                                                                                                                                                     |  |  |  |  |  |  |  |  |  |  |  |  |
| Temperature (Celsius)                                                                                                                                                                                                     |  |  |  |  |  |  |  |  |  |  |  |  |
| FHR (beats per min)                                                                                                                                                                                                       |  |  |  |  |  |  |  |  |  |  |  |  |
| Status of amniotic fluid (I for Intact membranes, C for Clear, B for Bloody and M for Meconium)                                                                                                                           |  |  |  |  |  |  |  |  |  |  |  |  |
| Remarks                                                                                                                                                                                                                   |  |  |  |  |  |  |  |  |  |  |  |  |

**REVIEW ALL DATA ABOVE ALONG WITH THE PARTOGRAPH TO DETERMINE IF THERE ARE ANY COMPLICATIONS**

If there is prolonged rupture of membranes (more than 12 hrs), there is possibility of infection.  
 Graph A: If the plotted cervical dilatation line is to the right of Line A, labour is prolonged or obstructed.  
 Graph B: If the contractions do not increase in frequency and duration, labour is prolonged or obstructed.  
 Graph C:

- If the maternal pulse is  $\geq 100$ /min, there is a possibility of infection or haemorrhage
- If the maternal BP is  $\geq 140/90$  mmHg, there is a pregnancy-induced hypertension or possibility of pre-eclampsia or eclampsia
- If the maternal BP systolic is  $< 90$  mmHg, the woman could be in shock
- If the maternal temperature is  $\geq 38^\circ$  C, there is possibility of infection.

Graph D:

- If the FHR is  $< 120$  beats/min or  $> 160$  beats/min, foetus is in distress.
- If there is meconium and/or blood-stained amniotic fluid, foetus is in distress and there is a possibility of infection or haemorrhage

|                                                                                                                                                   |                                                                                                                  |
|---------------------------------------------------------------------------------------------------------------------------------------------------|------------------------------------------------------------------------------------------------------------------|
| <b>C. OVERALL LABOUR ASSESSMENT</b> (Tick either a, b or c. Tick all complications observed)                                                      |                                                                                                                  |
| a. Woman in labour, died <input type="checkbox"/>                                                                                                 | → Complete Outcomes Sheet and other documentation                                                                |
| b. Woman in labour, no complications <input type="checkbox"/>                                                                                     | → Go the next Section of this Case Sheet                                                                         |
| c. Woman in labour, with complications <input type="checkbox"/>                                                                                   |                                                                                                                  |
| Rupture of membranes > 12 hrs / prolonged / obstructed labour <input type="checkbox"/>                                                            | → Manage and refer using Complication Sheet A                                                                    |
| Pregnancy induced hypertension <input type="checkbox"/> Pre-eclampsia <input type="checkbox"/> Eclampsia <input type="checkbox"/>                 | → Manage and refer using Complication Sheet B                                                                    |
| Antepartum haemorrhage with or without shock <input type="checkbox"/>                                                                             | → Manage and refer using Complication Sheet C                                                                    |
| Infection with or without shock <input type="checkbox"/>                                                                                          | → Manage and refer using Complication Sheet D                                                                    |
| Foetal distress <input type="checkbox"/>                                                                                                          | } → Refer using Complication Sheet H                                                                             |
| No foetal movement <input type="checkbox"/> Other <input type="checkbox"/> (specify) _____                                                        |                                                                                                                  |
| Date diagnosis made <input type="text"/> <input type="text"/> <input type="text"/> <input type="text"/> <input type="text"/> <input type="text"/> | Time diagnosis made <input type="text"/> <input type="text"/> hrs <input type="text"/> <input type="text"/> mins |
| Diagnosed by SN <input type="checkbox"/> MO <input type="checkbox"/> Other <input type="checkbox"/>                                               | Name of the staff _____ Signature _____                                                                          |

PARTOGRAPH FOR USE AT PHC (Start at 4 cms dilatation or more; plot always on vertical lines)

Name \_\_\_\_\_ PHC registration # \_\_\_\_\_ Parity \_\_\_\_\_

Date and time of rupture of membranes \_\_\_\_\_

**Graph A: Labour** (Start plotting dilatation at 4 cms or more with an X on Line A, corresponding to the cervical dilatation at first evaluation. Note the time at the top, corresponding to the first plot. Measure and plot with an X every four hours. If the plotted line is to the right of Line A or B, take action at PHC (manage at PHC and refer) or FRU respectively)

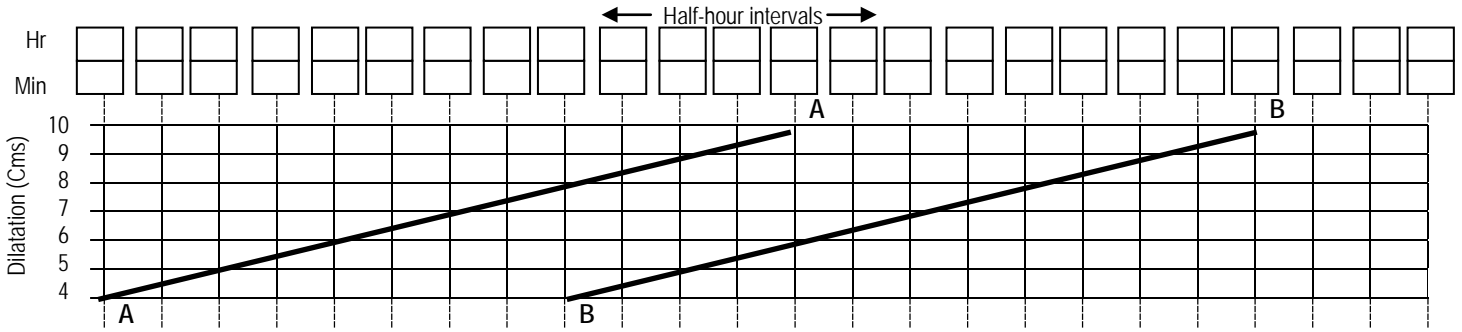

**Graph B: Labour** (Count contractions for 10 mins every half hour and record with an X; record duration in seconds)

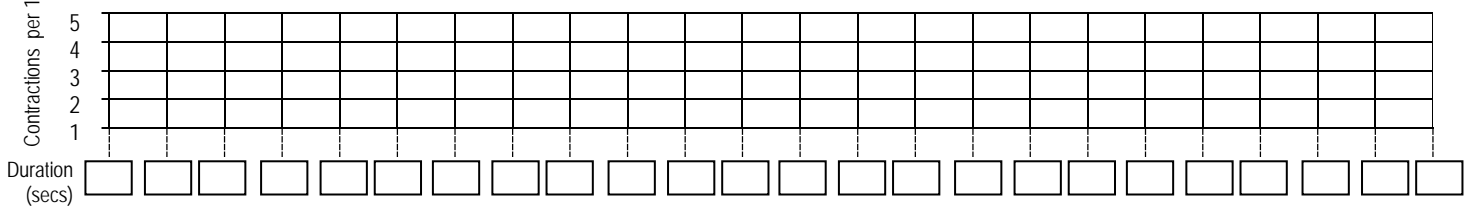

**Graph C: Maternal condition** (Record pulse with an X every half hour; record BP every four hours using ↓ symbol, the top arrow denoting systolic BP and the lower arrow denoting diastolic BP; record temperature every four hours)

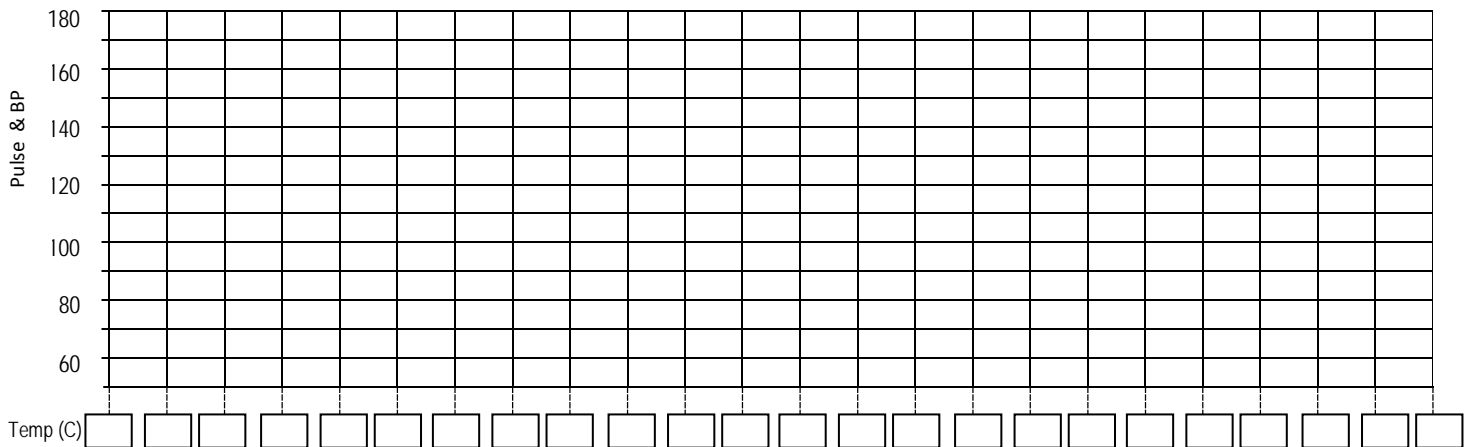

**Graph D: Foetal condition** (Record FHR with an X every half hour; record amniotic fluid (I, C, B, M) every half hour)

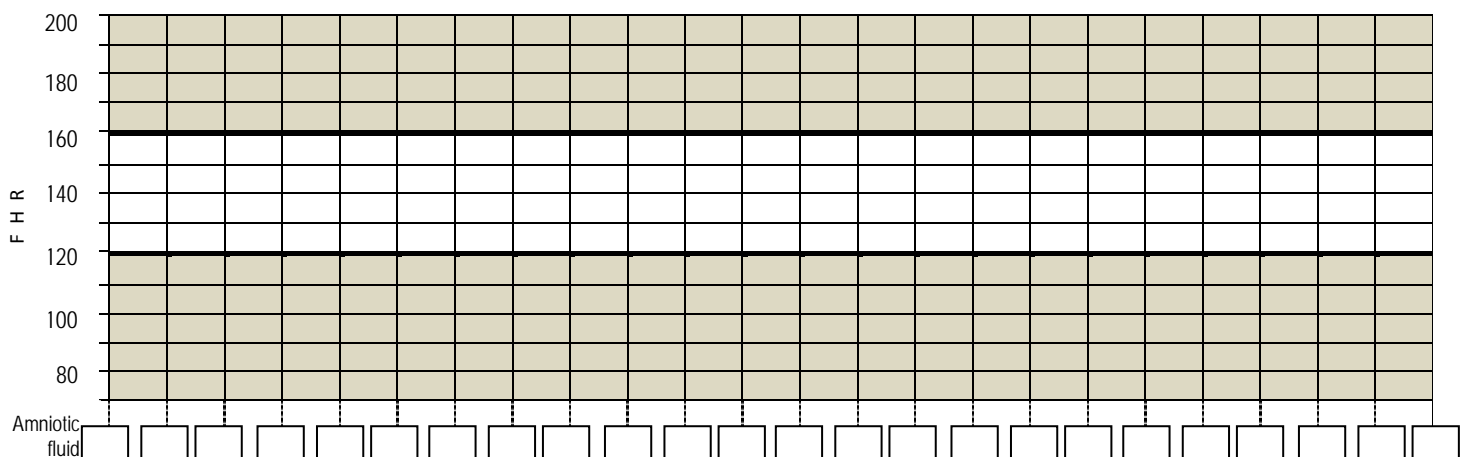

**SECTION 3: DELIVERY NOTES**

|                                                                                                                                                                                                                                                                                                                                                                                                                    |  |                                               |                      |                                                |                      |                                                                |                      |                                      |                      |                                    |                      |                                                         |      |                                                 |                      |                                                 |                      |                                                 |      |                          |  |
|--------------------------------------------------------------------------------------------------------------------------------------------------------------------------------------------------------------------------------------------------------------------------------------------------------------------------------------------------------------------------------------------------------------------|--|-----------------------------------------------|----------------------|------------------------------------------------|----------------------|----------------------------------------------------------------|----------------------|--------------------------------------|----------------------|------------------------------------|----------------------|---------------------------------------------------------|------|-------------------------------------------------|----------------------|-------------------------------------------------|----------------------|-------------------------------------------------|------|--------------------------|--|
| <b>DELIVERY NOTES (Note the particulars for women delivering at the facility. Fill separate forms for twin deliveries)</b>                                                                                                                                                                                                                                                                                         |  |                                               |                      |                                                |                      |                                                                |                      |                                      |                      |                                    |                      |                                                         |      |                                                 |                      |                                                 |                      |                                                 |      |                          |  |
| <b>A. PARTICULARS OF DELIVERY</b>                                                                                                                                                                                                                                                                                                                                                                                  |  |                                               |                      |                                                |                      |                                                                |                      |                                      |                      |                                    |                      |                                                         |      |                                                 |                      |                                                 |                      |                                                 |      |                          |  |
| Date of delivery                                                                                                                                                                                                                                                                                                                                                                                                   |  | day                                           | <input type="text"/> | <input type="text"/>                           | month                | <input type="text"/>                                           | <input type="text"/> | year                                 | <input type="text"/> | <input type="text"/>               | <input type="text"/> | <input type="text"/>                                    | Time | <input type="text"/>                            | <input type="text"/> | hrs                                             | <input type="text"/> | <input type="text"/>                            | mins |                          |  |
| Mode of delivery                                                                                                                                                                                                                                                                                                                                                                                                   |  | Spontaneous cephalic <input type="checkbox"/> |                      | Instrumental delivery <input type="checkbox"/> |                      | Breech <input type="checkbox"/>                                |                      | Amniotic fluid                       |                      | Clear <input type="checkbox"/>     |                      | Meconium stained <input type="checkbox"/>               |      | Bloody <input type="checkbox"/>                 |                      |                                                 |                      |                                                 |      |                          |  |
| Duration of rupture of membranes                                                                                                                                                                                                                                                                                                                                                                                   |  | <input type="text"/>                          | <input type="text"/> | hrs                                            | <input type="text"/> | <input type="text"/>                                           | mins                 |                                      |                      |                                    |                      |                                                         |      |                                                 |                      |                                                 |                      |                                                 |      |                          |  |
| <b>THIRD STAGE OF LABOUR</b>                                                                                                                                                                                                                                                                                                                                                                                       |  |                                               |                      |                                                |                      |                                                                |                      |                                      |                      |                                    |                      |                                                         |      |                                                 |                      |                                                 |                      |                                                 |      |                          |  |
| Active Management                                                                                                                                                                                                                                                                                                                                                                                                  |  | Uterotonic administered                       |                      | Y <input type="checkbox"/>                     |                      | N <input type="checkbox"/>                                     |                      | Controlled cord traction             |                      | Y <input type="checkbox"/>         |                      | N <input type="checkbox"/>                              |      | Uterine massage                                 |                      | Y <input type="checkbox"/>                      |                      | N <input type="checkbox"/>                      |      |                          |  |
| Uterotonic given either                                                                                                                                                                                                                                                                                                                                                                                            |  | Oxytocin 10 IU IM (preferred)                 |                      | <input type="checkbox"/>                       |                      | or IV <input type="checkbox"/>                                 |                      | or Misoprostol 600mcg Rectally       |                      | <input type="checkbox"/>           |                      | or Orally <input type="checkbox"/>                      |      | or                                              |                      |                                                 |                      |                                                 |      |                          |  |
| Methergine 0.2 mg IM                                                                                                                                                                                                                                                                                                                                                                                               |  | <input type="checkbox"/>                      |                      | or IV <input type="checkbox"/>                 |                      | Other                                                          |                      | <input type="text"/>                 |                      | If yes, specify Dose               |                      | <input type="text"/>                                    |      | Route                                           |                      | <input type="text"/>                            |                      |                                                 |      |                          |  |
| Placenta                                                                                                                                                                                                                                                                                                                                                                                                           |  | Complete <input type="checkbox"/>             |                      | Incomplete <input type="checkbox"/>            |                      | Expulsion of placenta                                          |                      | Spontaneous <input type="checkbox"/> |                      | Curettage <input type="checkbox"/> |                      | Manual removal <input type="checkbox"/>                 |      |                                                 |                      |                                                 |                      |                                                 |      |                          |  |
| Perineum Episiotomy                                                                                                                                                                                                                                                                                                                                                                                                |  | Y <input type="checkbox"/>                    |                      | N <input type="checkbox"/>                     |                      | Perineum tear                                                  |                      | Y <input type="checkbox"/>           |                      | N <input type="checkbox"/>         |                      | If yes, 1 <sup>st</sup> degree <input type="checkbox"/> |      | 2 <sup>nd</sup> degree <input type="checkbox"/> |                      | 3 <sup>rd</sup> degree <input type="checkbox"/> |                      | 4 <sup>th</sup> degree <input type="checkbox"/> |      |                          |  |
| Repair done                                                                                                                                                                                                                                                                                                                                                                                                        |  | Y <input type="checkbox"/>                    |                      | N <input type="checkbox"/>                     |                      |                                                                |                      |                                      |                      |                                    |                      |                                                         |      |                                                 |                      |                                                 |                      |                                                 |      |                          |  |
| Estimated blood loss                                                                                                                                                                                                                                                                                                                                                                                               |  | Average (less than 1 pad in 5 mins)           |                      | <input type="checkbox"/>                       |                      | Increased (1 pad in 5 mins or continuous bleeding for 10 mins) |                      | <input type="checkbox"/>             |                      | →                                  |                      | Manage and refer using Complication Sheet F             |      |                                                 |                      |                                                 |                      |                                                 |      |                          |  |
| Delivery conducted by                                                                                                                                                                                                                                                                                                                                                                                              |  | Name                                          |                      | <input type="text"/>                           |                      | Signature                                                      |                      | <input type="text"/>                 |                      |                                    |                      |                                                         |      |                                                 |                      |                                                 |                      |                                                 |      |                          |  |
| Designation                                                                                                                                                                                                                                                                                                                                                                                                        |  | SN <input type="checkbox"/>                   |                      | MO <input type="checkbox"/>                    |                      |                                                                |                      |                                      |                      |                                    |                      |                                                         |      |                                                 |                      |                                                 |                      |                                                 |      |                          |  |
| <b>B. PARTICULARS OF THE BABY</b>                                                                                                                                                                                                                                                                                                                                                                                  |  |                                               |                      |                                                |                      |                                                                |                      |                                      |                      |                                    |                      |                                                         |      |                                                 |                      |                                                 |                      |                                                 |      |                          |  |
| <u>General</u>                                                                                                                                                                                                                                                                                                                                                                                                     |  |                                               |                      |                                                |                      |                                                                |                      |                                      |                      |                                    |                      |                                                         |      |                                                 |                      |                                                 |                      |                                                 |      |                          |  |
| Sex                                                                                                                                                                                                                                                                                                                                                                                                                |  | Male <input type="checkbox"/>                 |                      | Female <input type="checkbox"/>                |                      | Weight                                                         |                      | <input type="text"/>                 |                      | <input type="text"/>               |                      | gms                                                     |      | LBW (<2500 gms)                                 |                      | Y <input type="checkbox"/>                      |                      | N <input type="checkbox"/>                      |      |                          |  |
| Outcome                                                                                                                                                                                                                                                                                                                                                                                                            |  | Live birth <input type="checkbox"/>           |                      | Still birth <input type="checkbox"/>           |                      | If still birth, Fresh                                          |                      | <input type="checkbox"/>             |                      | Macerated <input type="checkbox"/> |                      | Maturity                                                |      | Preterm (<37 wks)                               |                      | <input type="checkbox"/>                        |                      | Term (37 to 42 wks)                             |      | <input type="checkbox"/> |  |
| Post term (>42 wks)                                                                                                                                                                                                                                                                                                                                                                                                |  | <input type="checkbox"/>                      |                      | Apgar score                                    |                      | <input type="text"/>                                           |                      | at 1 min                             |                      | <input type="text"/>               |                      | at 5 mins                                               |      |                                                 |                      |                                                 |                      |                                                 |      |                          |  |
| Any anomalies                                                                                                                                                                                                                                                                                                                                                                                                      |  | Y <input type="checkbox"/>                    |                      | N <input type="checkbox"/>                     |                      | If yes, list                                                   |                      | <input type="text"/>                 |                      |                                    |                      |                                                         |      |                                                 |                      |                                                 |                      |                                                 |      |                          |  |
| <u>Resuscitation</u>                                                                                                                                                                                                                                                                                                                                                                                               |  |                                               |                      |                                                |                      |                                                                |                      |                                      |                      |                                    |                      |                                                         |      |                                                 |                      |                                                 |                      |                                                 |      |                          |  |
| Suction done                                                                                                                                                                                                                                                                                                                                                                                                       |  | Y <input type="checkbox"/>                    |                      | N <input type="checkbox"/>                     |                      | Oxygen given                                                   |                      | Y <input type="checkbox"/>           |                      | N <input type="checkbox"/>         |                      | Baby breathing after 30 secs                            |      | Y <input type="checkbox"/>                      |                      | N <input type="checkbox"/>                      |                      |                                                 |      |                          |  |
| If no, use bag and mask for 30 secs                                                                                                                                                                                                                                                                                                                                                                                |  | Y <input type="checkbox"/>                    |                      | N <input type="checkbox"/>                     |                      | Baby breathing after another 30 secs                           |                      | Y <input type="checkbox"/>           |                      | N <input type="checkbox"/>         |                      |                                                         |      |                                                 |                      |                                                 |                      |                                                 |      |                          |  |
| If still not breathing (Asphyxia), continue bag and mask ventilation                                                                                                                                                                                                                                                                                                                                               |  | Y <input type="checkbox"/>                    |                      | N <input type="checkbox"/>                     |                      | Oxygen given                                                   |                      | Y <input type="checkbox"/>           |                      | N <input type="checkbox"/>         |                      |                                                         |      |                                                 |                      |                                                 |                      |                                                 |      |                          |  |
| Chest compressions done (if trained)                                                                                                                                                                                                                                                                                                                                                                               |  | Y <input type="checkbox"/>                    |                      | N <input type="checkbox"/>                     |                      | and Manage and refer using Complication Sheet G                |                      |                                      |                      |                                    |                      |                                                         |      |                                                 |                      |                                                 |                      |                                                 |      |                          |  |
| <u>Medication given</u>                                                                                                                                                                                                                                                                                                                                                                                            |  |                                               |                      |                                                |                      |                                                                |                      |                                      |                      |                                    |                      |                                                         |      |                                                 |                      |                                                 |                      |                                                 |      |                          |  |
| Injection Vitamin K                                                                                                                                                                                                                                                                                                                                                                                                |  | Y <input type="checkbox"/>                    |                      | N <input type="checkbox"/>                     |                      | Dose 1 mg for > 1500 gms                                       |                      | <input type="checkbox"/>             |                      | or 0.5 mg ≤ 1500 gms               |                      | <input type="checkbox"/>                                |      | Others <input type="checkbox"/>                 |                      | (specify)                                       |                      | <input type="text"/>                            |      |                          |  |
| <u>Breastfeeding initiation</u>                                                                                                                                                                                                                                                                                                                                                                                    |  |                                               |                      |                                                |                      |                                                                |                      |                                      |                      |                                    |                      |                                                         |      |                                                 |                      |                                                 |                      |                                                 |      |                          |  |
| Time of initiating breastfeeding                                                                                                                                                                                                                                                                                                                                                                                   |  | <input type="text"/>                          |                      | <input type="text"/>                           |                      | hrs                                                            |                      | <input type="text"/>                 |                      | <input type="text"/>               |                      | mins                                                    |      |                                                 |                      |                                                 |                      |                                                 |      |                          |  |
| Initiation of immediate skin to skin contact                                                                                                                                                                                                                                                                                                                                                                       |  | Y <input type="checkbox"/>                    |                      | N <input type="checkbox"/>                     |                      | Chlorhexidine applied on cord                                  |                      | Y <input type="checkbox"/>           |                      | N <input type="checkbox"/>         |                      |                                                         |      |                                                 |                      |                                                 |                      |                                                 |      |                          |  |
| Baby attended by                                                                                                                                                                                                                                                                                                                                                                                                   |  | Name                                          |                      | <input type="text"/>                           |                      | Signature                                                      |                      | <input type="text"/>                 |                      |                                    |                      |                                                         |      |                                                 |                      |                                                 |                      |                                                 |      |                          |  |
| Designation                                                                                                                                                                                                                                                                                                                                                                                                        |  | SN <input type="checkbox"/>                   |                      | MO <input type="checkbox"/>                    |                      | Other <input type="checkbox"/>                                 |                      |                                      |                      |                                    |                      |                                                         |      |                                                 |                      |                                                 |                      |                                                 |      |                          |  |
| COMPLETE THE CHILD SECTION OF THAYI CARD                                                                                                                                                                                                                                                                                                                                                                           |  |                                               |                      |                                                |                      |                                                                |                      |                                      |                      |                                    |                      |                                                         |      |                                                 |                      |                                                 |                      |                                                 |      |                          |  |
| <b>C.FOURTH STAGE OF LABOUR (After delivery, measure and record every 15 minutes for 2 hours for the mother except temperature that should be recorded twice. Measure and record every 15 minutes for one hour and then at two hours for the newborn weighing between 1800 and 2500 gms or that needed resuscitation. For other newborns measure once at the end of each hour. Each column represents 15 mins)</b> |  |                                               |                      |                                                |                      |                                                                |                      |                                      |                      |                                    |                      |                                                         |      |                                                 |                      |                                                 |                      |                                                 |      |                          |  |
| Time (hrs and mins)                                                                                                                                                                                                                                                                                                                                                                                                |  |                                               |                      |                                                |                      |                                                                |                      |                                      |                      |                                    |                      |                                                         |      |                                                 |                      |                                                 |                      |                                                 |      |                          |  |
| Maternal temperature (in Celsius)                                                                                                                                                                                                                                                                                                                                                                                  |  |                                               |                      |                                                |                      |                                                                |                      |                                      |                      |                                    |                      |                                                         |      |                                                 |                      |                                                 |                      |                                                 |      |                          |  |
| Maternal pulse (beats per min)                                                                                                                                                                                                                                                                                                                                                                                     |  |                                               |                      |                                                |                      |                                                                |                      |                                      |                      |                                    |                      |                                                         |      |                                                 |                      |                                                 |                      |                                                 |      |                          |  |
| Maternal blood pressure (mmHg)                                                                                                                                                                                                                                                                                                                                                                                     |  |                                               |                      |                                                |                      |                                                                |                      |                                      |                      |                                    |                      |                                                         |      |                                                 |                      |                                                 |                      |                                                 |      |                          |  |
| Uterus contracted? (Y or N)                                                                                                                                                                                                                                                                                                                                                                                        |  |                                               |                      |                                                |                      |                                                                |                      |                                      |                      |                                    |                      |                                                         |      |                                                 |                      |                                                 |                      |                                                 |      |                          |  |
| Bleeding PV (AVERAGE, HEAVY or VERY HEAVY)                                                                                                                                                                                                                                                                                                                                                                         |  |                                               |                      |                                                |                      |                                                                |                      |                                      |                      |                                    |                      |                                                         |      |                                                 |                      |                                                 |                      |                                                 |      |                          |  |
| Newborn feeding well (Y or N)                                                                                                                                                                                                                                                                                                                                                                                      |  |                                               |                      |                                                |                      |                                                                |                      |                                      |                      |                                    |                      |                                                         |      |                                                 |                      |                                                 |                      |                                                 |      |                          |  |
| Newborn colour (PINK, BLUE or PALE)                                                                                                                                                                                                                                                                                                                                                                                |  |                                               |                      |                                                |                      |                                                                |                      |                                      |                      |                                    |                      |                                                         |      |                                                 |                      |                                                 |                      |                                                 |      |                          |  |
| Newborn nasal flaring (Y or N)                                                                                                                                                                                                                                                                                                                                                                                     |  |                                               |                      |                                                |                      |                                                                |                      |                                      |                      |                                    |                      |                                                         |      |                                                 |                      |                                                 |                      |                                                 |      |                          |  |
| Newborn grunting (Y or N)                                                                                                                                                                                                                                                                                                                                                                                          |  |                                               |                      |                                                |                      |                                                                |                      |                                      |                      |                                    |                      |                                                         |      |                                                 |                      |                                                 |                      |                                                 |      |                          |  |
| Newborn chest retractions (Y or N)                                                                                                                                                                                                                                                                                                                                                                                 |  |                                               |                      |                                                |                      |                                                                |                      |                                      |                      |                                    |                      |                                                         |      |                                                 |                      |                                                 |                      |                                                 |      |                          |  |
| Newborn respiratory rate (breaths per min)                                                                                                                                                                                                                                                                                                                                                                         |  |                                               |                      |                                                |                      |                                                                |                      |                                      |                      |                                    |                      |                                                         |      |                                                 |                      |                                                 |                      |                                                 |      |                          |  |
| Newborn heart rate (Record beats per min)                                                                                                                                                                                                                                                                                                                                                                          |  |                                               |                      |                                                |                      |                                                                |                      |                                      |                      |                                    |                      |                                                         |      |                                                 |                      |                                                 |                      |                                                 |      |                          |  |
| Cord bleeding (Y or N)                                                                                                                                                                                                                                                                                                                                                                                             |  |                                               |                      |                                                |                      |                                                                |                      |                                      |                      |                                    |                      |                                                         |      |                                                 |                      |                                                 |                      |                                                 |      |                          |  |
| Remarks                                                                                                                                                                                                                                                                                                                                                                                                            |  |                                               |                      |                                                |                      |                                                                |                      |                                      |                      |                                    |                      |                                                         |      |                                                 |                      |                                                 |                      |                                                 |      |                          |  |
| Action taken                                                                                                                                                                                                                                                                                                                                                                                                       |  |                                               |                      |                                                |                      |                                                                |                      |                                      |                      |                                    |                      |                                                         |      |                                                 |                      |                                                 |                      |                                                 |      |                          |  |

**D. POST-DELIVERY ASSESSMENT OF MOTHER (Tick a, b or c. Tick all complications observed)**

a. Woman died during delivery  → Complete Outcomes Sheet and other documentation

b. Woman healthy  → Go to the next Section of this Case Sheet

c. Woman with complications

Pregnancy induced hypertension  Pre-eclampsia  Eclampsia  → Manage and refer using Complication Sheet B

Infection with or without shock  → Manage and refer using Complication Sheet D

Postpartum haemorrhage  → Manage and refer using Complication Sheet F

Other  (specify) \_\_\_\_\_ → Refer using Complication Sheet H

**E. POST-DELIVERY ASSESSMENT OF NEWBORN (Tick a, b, c or d. Tick all complications observed)**

a. Still birth  → Complete Outcomes Sheet and other documentation

b. Newborn died  → Complete Outcomes Sheet and other documentation

c. Newborn healthy  → Go to the next Section of this Case Sheet

d. Newborn with complications

Asphyxia  LBW requiring referral (<1800 gms)  Preterm  } → Manage and refer using Complication Sheet G

Birth anomalies  Infection / Sepsis  Other  (specify) \_\_\_\_\_

Date diagnosis made       Time diagnosis made   hrs   mins

Diagnosed by SN  MO  Other  Name of the staff \_\_\_\_\_ Signature \_\_\_\_\_

**SECTION 4: POSTPARTUM PERIOD**

| A.MATERNAL ASSESSMENT (Do the following assessments every 6 hours or more frequently if necessary. Each column represents 6 hours. For some items, ask the woman and for some observe, examine or measure) |       |  |  |       |  |  |  |  |
|------------------------------------------------------------------------------------------------------------------------------------------------------------------------------------------------------------|-------|--|--|-------|--|--|--|--|
| Postpartum day                                                                                                                                                                                             | Day 1 |  |  | Day 2 |  |  |  |  |
| Time (hrs and mins)                                                                                                                                                                                        |       |  |  |       |  |  |  |  |
| Fever (Y or N)                                                                                                                                                                                             |       |  |  |       |  |  |  |  |
| Bleeding PV (AVERAGE, HEAVY or VERY HEAVY)                                                                                                                                                                 |       |  |  |       |  |  |  |  |
| Headache/ blurred vision (Y or N)                                                                                                                                                                          |       |  |  |       |  |  |  |  |
| Breast pain (Y or N)                                                                                                                                                                                       |       |  |  |       |  |  |  |  |
| Abdominal/ perineal pain (Y or N)                                                                                                                                                                          |       |  |  |       |  |  |  |  |
| Vomiting (Y or N)                                                                                                                                                                                          |       |  |  |       |  |  |  |  |
| Other complaints (specify)                                                                                                                                                                                 |       |  |  |       |  |  |  |  |
| Temperature (Celsius)                                                                                                                                                                                      |       |  |  |       |  |  |  |  |
| Pulse (beats per min)                                                                                                                                                                                      |       |  |  |       |  |  |  |  |
| Blood pressure (mmHg)                                                                                                                                                                                      |       |  |  |       |  |  |  |  |
| Respiratory rate (breaths per min)                                                                                                                                                                         |       |  |  |       |  |  |  |  |
| Uterine tone (HARD or SOFT)                                                                                                                                                                                |       |  |  |       |  |  |  |  |
| Uterine height (ABOVE or BELOW UMBILICUS)                                                                                                                                                                  |       |  |  |       |  |  |  |  |
| Uterine tenderness (TENDER or NOT TENDER)                                                                                                                                                                  |       |  |  |       |  |  |  |  |
| Episiotomy/ tear (PRESENT & HEALTHY or PRESENT & UNHEALTHY)                                                                                                                                                |       |  |  |       |  |  |  |  |
| Lochia colour (RED, YELLOW, or WHITE)                                                                                                                                                                      |       |  |  |       |  |  |  |  |
| Lochia odour (NORMAL or FOUL SMELLING)                                                                                                                                                                     |       |  |  |       |  |  |  |  |
| B.NEWBORN ASSESSMENT (Do the following assessments every 6 hours or more frequently if necessary. Each column represents 6 hours. For some items, ask the woman and for some observe, examine or measure)  |       |  |  |       |  |  |  |  |
| Postpartum day                                                                                                                                                                                             | Day 1 |  |  | Day 2 |  |  |  |  |
| Time (hrs and mins)                                                                                                                                                                                        |       |  |  |       |  |  |  |  |
| Meconium passed in 24 hours (Y or N)                                                                                                                                                                       |       |  |  |       |  |  |  |  |
| Urine passed (Y or N) (should be in 48 hours)                                                                                                                                                              |       |  |  |       |  |  |  |  |
| Cry (NORMAL, WEAK, or EXCESSIVE/ IRRITABLE)                                                                                                                                                                |       |  |  |       |  |  |  |  |
| Feeding (WELL or NOT WELL)                                                                                                                                                                                 |       |  |  |       |  |  |  |  |
| Colour (PINK, BLUE or PALE)                                                                                                                                                                                |       |  |  |       |  |  |  |  |
| Nasal flaring (Y or N)                                                                                                                                                                                     |       |  |  |       |  |  |  |  |
| Grunting (Y or N)                                                                                                                                                                                          |       |  |  |       |  |  |  |  |
| Chest retractions (Y or N)                                                                                                                                                                                 |       |  |  |       |  |  |  |  |
| Respiratory rate (breaths per min)                                                                                                                                                                         |       |  |  |       |  |  |  |  |
| Heart rate (beats per min)                                                                                                                                                                                 |       |  |  |       |  |  |  |  |
| Eyes (NORMAL or ANY DISCHARGE)                                                                                                                                                                             |       |  |  |       |  |  |  |  |
| Skin (NORMAL, YELLOW or PUSTULES)                                                                                                                                                                          |       |  |  |       |  |  |  |  |
| Cord (HEALTHY or UNHEALTHY)                                                                                                                                                                                |       |  |  |       |  |  |  |  |
| Activity (ACTIVE/ ALERT, LETHARGIC or UNRESPONSIVE)                                                                                                                                                        |       |  |  |       |  |  |  |  |
| Touch temperature (TOO WARM or WARM or COLD PERIPHERIES / HYPOTHERMIC)                                                                                                                                     |       |  |  |       |  |  |  |  |
| Temperature (Celsius)                                                                                                                                                                                      |       |  |  |       |  |  |  |  |
| Other concerns (specify)                                                                                                                                                                                   |       |  |  |       |  |  |  |  |
| Remarks                                                                                                                                                                                                    |       |  |  |       |  |  |  |  |
| Action taken                                                                                                                                                                                               |       |  |  |       |  |  |  |  |

| C. COUNSELING (Check if provided counselling on the following topics at some points during the PHC stay, not necessarily at one time) |                                          |       |  |
|---------------------------------------------------------------------------------------------------------------------------------------|------------------------------------------|-------|--|
| Postpartum day                                                                                                                        | Day 1                                    | Day 2 |  |
| Feeding the newborn                                                                                                                   |                                          |       |  |
| Warmth for the newborn                                                                                                                |                                          |       |  |
| Bathing of the newborn                                                                                                                |                                          |       |  |
| Cord care: Nothing on cord                                                                                                            |                                          |       |  |
| Immunization for the newborn                                                                                                          |                                          |       |  |
| Care of skin/ eyes for the newborn                                                                                                    |                                          |       |  |
| Maternal nutrition                                                                                                                    |                                          |       |  |
| Family planning                                                                                                                       |                                          |       |  |
| Maternal danger signs                                                                                                                 | Fever                                    |       |  |
|                                                                                                                                       | Convulsions                              |       |  |
|                                                                                                                                       | Blurred vision/severe headache           |       |  |
|                                                                                                                                       | Increased PV bleeding                    |       |  |
|                                                                                                                                       | Foul PV discharge or odour               |       |  |
|                                                                                                                                       | Breathing difficulty                     |       |  |
|                                                                                                                                       | Swollen/ red /tender breasts             |       |  |
|                                                                                                                                       | Pain/ difficulty in passing urine        |       |  |
|                                                                                                                                       | Worsening abdominal pain                 |       |  |
| Worsening perineal pain                                                                                                               |                                          |       |  |
| Newborn danger signs                                                                                                                  | Breathing difficulty                     |       |  |
|                                                                                                                                       | Feeding problems                         |       |  |
|                                                                                                                                       | Convulsions                              |       |  |
|                                                                                                                                       | Diarrhoea/vomiting                       |       |  |
|                                                                                                                                       | Hypo/hyperthermia                        |       |  |
|                                                                                                                                       | Icterus/ yellow skin                     |       |  |
|                                                                                                                                       | Stiff (body arched) or floppy            |       |  |
|                                                                                                                                       | Irritability/ lethargy                   |       |  |
|                                                                                                                                       | Pustules on skin or boil                 |       |  |
|                                                                                                                                       | Not passing urine at least 6 times a day |       |  |
| Pus/ inflamed red umbilicus                                                                                                           |                                          |       |  |
| Blood in stool                                                                                                                        |                                          |       |  |
| Remarks                                                                                                                               |                                          |       |  |
| Action taken                                                                                                                          |                                          |       |  |

**D. MEDICATIONS AND IMMUNIZATIONS GIVEN FOR THE NEWBORN (Record if provided during the PHC stay)**

BCG  OPV  Hep B  Others  (specify) \_\_\_\_\_

**E. POSTPARTUM ASSESSMENT OF THE MOTHER (Tick a, b or c. Tick all complications observed)**

- a. Woman died  → Complete Outcomes Sheet and other documentation
- b. Woman healthy  → Go to the next Section of this Case Sheet
- c. Woman with complications 
  - Pregnancy induced hypertension  Pre-eclampsia  Eclampsia  → Manage and refer using Complication Sheet B
  - Infection with or without shock  → Manage and refer using Complication Sheet D
  - Postpartum haemorrhage  → Manage and refer using Complication Sheet F
  - Other  (specify) \_\_\_\_\_ → Go to Referral Sheet H

**F. POSTPARTUM ASSESSMENT OF THE NEWBORN (Tick a, b or c. Tick all complications observed)**

- a. Newborn died  → Complete Outcomes Sheet and other documentation
- b. Newborn healthy  → Go to the next Section of this Case Sheet
- c. Newborn with complications 
  - Infection / Sepsis  } → Manage and refer using Complication Sheet G
  - Other  (specify) \_\_\_\_\_

Date diagnosis made       Time diagnosis made   hrs   mins

Diagnosed by SN  MO  Other  Name of the staff \_\_\_\_\_ Signature \_\_\_\_\_



**OUTCOMES SHEET**

Fill this sheet for women and/or newborns discharged together without either being referred.

Fill this sheet also if either or both of them die at the PHC

| A. BACKGROUND INFORMATION                                                                                                                                                                                                                                                                |                                                                                                                                                                                                                                                                                                                                                                                                                                                                                                                                                                                                                                                                                                                                                                                                                                                                              |  |  |  |                                                                                                                                                                                                                                                                                                                                                                                                                   |  |  |  |  |  |  |  |  |
|------------------------------------------------------------------------------------------------------------------------------------------------------------------------------------------------------------------------------------------------------------------------------------------|------------------------------------------------------------------------------------------------------------------------------------------------------------------------------------------------------------------------------------------------------------------------------------------------------------------------------------------------------------------------------------------------------------------------------------------------------------------------------------------------------------------------------------------------------------------------------------------------------------------------------------------------------------------------------------------------------------------------------------------------------------------------------------------------------------------------------------------------------------------------------|--|--|--|-------------------------------------------------------------------------------------------------------------------------------------------------------------------------------------------------------------------------------------------------------------------------------------------------------------------------------------------------------------------------------------------------------------------|--|--|--|--|--|--|--|--|
| District _____                                                                                                                                                                                                                                                                           | Taluka _____                                                                                                                                                                                                                                                                                                                                                                                                                                                                                                                                                                                                                                                                                                                                                                                                                                                                 |  |  |  |                                                                                                                                                                                                                                                                                                                                                                                                                   |  |  |  |  |  |  |  |  |
| PHC Location _____                                                                                                                                                                                                                                                                       |                                                                                                                                                                                                                                                                                                                                                                                                                                                                                                                                                                                                                                                                                                                                                                                                                                                                              |  |  |  |                                                                                                                                                                                                                                                                                                                                                                                                                   |  |  |  |  |  |  |  |  |
| Name _____                                                                                                                                                                                                                                                                               | Thayi card number <table border="1" style="display: inline-table; border-collapse: collapse;"><tr><td style="width: 15px; height: 15px;"></td><td style="width: 15px; height: 15px;"></td></tr></table>                                                                                                                                                                                                                                                                                                      |  |  |  |                                                                                                                                                                                                                                                                                                                                                                                                                   |  |  |  |  |  |  |  |  |
|                                                                                                                                                                                                                                                                                          |                                                                                                                                                                                                                                                                                                                                                                                                                                                                                                                                                                                                                                                                                                                                                                                                                                                                              |  |  |  |                                                                                                                                                                                                                                                                                                                                                                                                                   |  |  |  |  |  |  |  |  |
| Address _____                                                                                                                                                                                                                                                                            |                                                                                                                                                                                                                                                                                                                                                                                                                                                                                                                                                                                                                                                                                                                                                                                                                                                                              |  |  |  |                                                                                                                                                                                                                                                                                                                                                                                                                   |  |  |  |  |  |  |  |  |
| Contact number                                                                                                                                                                                                                                                                           | <table border="1" style="display: inline-table; border-collapse: collapse;"><tr><td style="width: 15px; height: 15px;"></td><td style="width: 15px; height: 15px;"></td></tr></table>                                                                                                                                                                                                                                                                                                                        |  |  |  |                                                                                                                                                                                                                                                                                                                                                                                                                   |  |  |  |  |  |  |  |  |
|                                                                                                                                                                                                                                                                                          |                                                                                                                                                                                                                                                                                                                                                                                                                                                                                                                                                                                                                                                                                                                                                                                                                                                                              |  |  |  |                                                                                                                                                                                                                                                                                                                                                                                                                   |  |  |  |  |  |  |  |  |
| Date of admission                                                                                                                                                                                                                                                                        | <table border="1" style="display: inline-table; border-collapse: collapse;"><tr><td style="width: 15px; height: 15px;"></td><td style="width: 15px; height: 15px;"></td></tr></table> Time of admission <table border="1" style="display: inline-table; border-collapse: collapse;"><tr><td style="width: 15px; height: 15px;"></td><td style="width: 15px; height: 15px;"></td></tr></table> hrs <table border="1" style="display: inline-table; border-collapse: collapse;"><tr><td style="width: 15px; height: 15px;"></td><td style="width: 15px; height: 15px;"></td></tr></table> mins         |  |  |  |                                                                                                                                                                                                                                                                                                                                                                                                                   |  |  |  |  |  |  |  |  |
|                                                                                                                                                                                                                                                                                          |                                                                                                                                                                                                                                                                                                                                                                                                                                                                                                                                                                                                                                                                                                                                                                                                                                                                              |  |  |  |                                                                                                                                                                                                                                                                                                                                                                                                                   |  |  |  |  |  |  |  |  |
|                                                                                                                                                                                                                                                                                          |                                                                                                                                                                                                                                                                                                                                                                                                                                                                                                                                                                                                                                                                                                                                                                                                                                                                              |  |  |  |                                                                                                                                                                                                                                                                                                                                                                                                                   |  |  |  |  |  |  |  |  |
|                                                                                                                                                                                                                                                                                          |                                                                                                                                                                                                                                                                                                                                                                                                                                                                                                                                                                                                                                                                                                                                                                                                                                                                              |  |  |  |                                                                                                                                                                                                                                                                                                                                                                                                                   |  |  |  |  |  |  |  |  |
| Date of delivery                                                                                                                                                                                                                                                                         | <table border="1" style="display: inline-table; border-collapse: collapse;"><tr><td style="width: 15px; height: 15px;"></td><td style="width: 15px; height: 15px;"></td></tr></table> Time of delivery <table border="1" style="display: inline-table; border-collapse: collapse;"><tr><td style="width: 15px; height: 15px;"></td><td style="width: 15px; height: 15px;"></td></tr></table> hrs <table border="1" style="display: inline-table; border-collapse: collapse;"><tr><td style="width: 15px; height: 15px;"></td><td style="width: 15px; height: 15px;"></td></tr></table> mins          |  |  |  |                                                                                                                                                                                                                                                                                                                                                                                                                   |  |  |  |  |  |  |  |  |
|                                                                                                                                                                                                                                                                                          |                                                                                                                                                                                                                                                                                                                                                                                                                                                                                                                                                                                                                                                                                                                                                                                                                                                                              |  |  |  |                                                                                                                                                                                                                                                                                                                                                                                                                   |  |  |  |  |  |  |  |  |
|                                                                                                                                                                                                                                                                                          |                                                                                                                                                                                                                                                                                                                                                                                                                                                                                                                                                                                                                                                                                                                                                                                                                                                                              |  |  |  |                                                                                                                                                                                                                                                                                                                                                                                                                   |  |  |  |  |  |  |  |  |
|                                                                                                                                                                                                                                                                                          |                                                                                                                                                                                                                                                                                                                                                                                                                                                                                                                                                                                                                                                                                                                                                                                                                                                                              |  |  |  |                                                                                                                                                                                                                                                                                                                                                                                                                   |  |  |  |  |  |  |  |  |
| Date of discharge / death                                                                                                                                                                                                                                                                | <table border="1" style="display: inline-table; border-collapse: collapse;"><tr><td style="width: 15px; height: 15px;"></td><td style="width: 15px; height: 15px;"></td></tr></table> Time of discharge / death <table border="1" style="display: inline-table; border-collapse: collapse;"><tr><td style="width: 15px; height: 15px;"></td><td style="width: 15px; height: 15px;"></td></tr></table> hrs <table border="1" style="display: inline-table; border-collapse: collapse;"><tr><td style="width: 15px; height: 15px;"></td><td style="width: 15px; height: 15px;"></td></tr></table> mins |  |  |  |                                                                                                                                                                                                                                                                                                                                                                                                                   |  |  |  |  |  |  |  |  |
|                                                                                                                                                                                                                                                                                          |                                                                                                                                                                                                                                                                                                                                                                                                                                                                                                                                                                                                                                                                                                                                                                                                                                                                              |  |  |  |                                                                                                                                                                                                                                                                                                                                                                                                                   |  |  |  |  |  |  |  |  |
|                                                                                                                                                                                                                                                                                          |                                                                                                                                                                                                                                                                                                                                                                                                                                                                                                                                                                                                                                                                                                                                                                                                                                                                              |  |  |  |                                                                                                                                                                                                                                                                                                                                                                                                                   |  |  |  |  |  |  |  |  |
|                                                                                                                                                                                                                                                                                          |                                                                                                                                                                                                                                                                                                                                                                                                                                                                                                                                                                                                                                                                                                                                                                                                                                                                              |  |  |  |                                                                                                                                                                                                                                                                                                                                                                                                                   |  |  |  |  |  |  |  |  |
| B. OUTCOMES                                                                                                                                                                                                                                                                              |                                                                                                                                                                                                                                                                                                                                                                                                                                                                                                                                                                                                                                                                                                                                                                                                                                                                              |  |  |  |                                                                                                                                                                                                                                                                                                                                                                                                                   |  |  |  |  |  |  |  |  |
| Maternal outcome (Tick either a, b, c or d)                                                                                                                                                                                                                                              |                                                                                                                                                                                                                                                                                                                                                                                                                                                                                                                                                                                                                                                                                                                                                                                                                                                                              |  |  |  |                                                                                                                                                                                                                                                                                                                                                                                                                   |  |  |  |  |  |  |  |  |
| a. Woman healthy with no complications <input type="checkbox"/>                                                                                                                                                                                                                          |                                                                                                                                                                                                                                                                                                                                                                                                                                                                                                                                                                                                                                                                                                                                                                                                                                                                              |  |  |  |                                                                                                                                                                                                                                                                                                                                                                                                                   |  |  |  |  |  |  |  |  |
| b. Woman healthy after being treated for complications at the PHC <input type="checkbox"/> Specify _____                                                                                                                                                                                 |                                                                                                                                                                                                                                                                                                                                                                                                                                                                                                                                                                                                                                                                                                                                                                                                                                                                              |  |  |  |                                                                                                                                                                                                                                                                                                                                                                                                                   |  |  |  |  |  |  |  |  |
| c. Woman died <input type="checkbox"/>                                                                                                                                                                                                                                                   |                                                                                                                                                                                                                                                                                                                                                                                                                                                                                                                                                                                                                                                                                                                                                                                                                                                                              |  |  |  |                                                                                                                                                                                                                                                                                                                                                                                                                   |  |  |  |  |  |  |  |  |
| During initial assessment <input type="checkbox"/> During labour <input type="checkbox"/> During delivery <input type="checkbox"/> During postpartum period <input type="checkbox"/>                                                                                                     |                                                                                                                                                                                                                                                                                                                                                                                                                                                                                                                                                                                                                                                                                                                                                                                                                                                                              |  |  |  |                                                                                                                                                                                                                                                                                                                                                                                                                   |  |  |  |  |  |  |  |  |
| Possible cause of death _____                                                                                                                                                                                                                                                            |                                                                                                                                                                                                                                                                                                                                                                                                                                                                                                                                                                                                                                                                                                                                                                                                                                                                              |  |  |  |                                                                                                                                                                                                                                                                                                                                                                                                                   |  |  |  |  |  |  |  |  |
| d. Woman referred for complication (if newborn died) <input type="checkbox"/> Specify complication _____                                                                                                                                                                                 |                                                                                                                                                                                                                                                                                                                                                                                                                                                                                                                                                                                                                                                                                                                                                                                                                                                                              |  |  |  |                                                                                                                                                                                                                                                                                                                                                                                                                   |  |  |  |  |  |  |  |  |
| Newborn outcome (Tick either a, b, c or d)                                                                                                                                                                                                                                               |                                                                                                                                                                                                                                                                                                                                                                                                                                                                                                                                                                                                                                                                                                                                                                                                                                                                              |  |  |  |                                                                                                                                                                                                                                                                                                                                                                                                                   |  |  |  |  |  |  |  |  |
| a. Live birth <input type="checkbox"/>                                                                                                                                                                                                                                                   |                                                                                                                                                                                                                                                                                                                                                                                                                                                                                                                                                                                                                                                                                                                                                                                                                                                                              |  |  |  |                                                                                                                                                                                                                                                                                                                                                                                                                   |  |  |  |  |  |  |  |  |
| Newborn healthy with no complications <input type="checkbox"/>                                                                                                                                                                                                                           |                                                                                                                                                                                                                                                                                                                                                                                                                                                                                                                                                                                                                                                                                                                                                                                                                                                                              |  |  |  |                                                                                                                                                                                                                                                                                                                                                                                                                   |  |  |  |  |  |  |  |  |
| Newborn healthy after being treated for complications at the PHC <input type="checkbox"/> Specify _____                                                                                                                                                                                  |                                                                                                                                                                                                                                                                                                                                                                                                                                                                                                                                                                                                                                                                                                                                                                                                                                                                              |  |  |  |                                                                                                                                                                                                                                                                                                                                                                                                                   |  |  |  |  |  |  |  |  |
| b. Newborn referred for complication (if mother died) <input type="checkbox"/> Specify complication _____                                                                                                                                                                                |                                                                                                                                                                                                                                                                                                                                                                                                                                                                                                                                                                                                                                                                                                                                                                                                                                                                              |  |  |  |                                                                                                                                                                                                                                                                                                                                                                                                                   |  |  |  |  |  |  |  |  |
| c. Still birth <input type="checkbox"/> Fresh <input type="checkbox"/> Macerated <input type="checkbox"/>                                                                                                                                                                                |                                                                                                                                                                                                                                                                                                                                                                                                                                                                                                                                                                                                                                                                                                                                                                                                                                                                              |  |  |  |                                                                                                                                                                                                                                                                                                                                                                                                                   |  |  |  |  |  |  |  |  |
| d. Newborn died <input type="checkbox"/>                                                                                                                                                                                                                                                 |                                                                                                                                                                                                                                                                                                                                                                                                                                                                                                                                                                                                                                                                                                                                                                                                                                                                              |  |  |  |                                                                                                                                                                                                                                                                                                                                                                                                                   |  |  |  |  |  |  |  |  |
| During delivery <input type="checkbox"/> During postpartum period <input type="checkbox"/>                                                                                                                                                                                               |                                                                                                                                                                                                                                                                                                                                                                                                                                                                                                                                                                                                                                                                                                                                                                                                                                                                              |  |  |  |                                                                                                                                                                                                                                                                                                                                                                                                                   |  |  |  |  |  |  |  |  |
| Possible cause of death _____                                                                                                                                                                                                                                                            |                                                                                                                                                                                                                                                                                                                                                                                                                                                                                                                                                                                                                                                                                                                                                                                                                                                                              |  |  |  |                                                                                                                                                                                                                                                                                                                                                                                                                   |  |  |  |  |  |  |  |  |
| C. DELIVERY DETAILS                                                                                                                                                                                                                                                                      |                                                                                                                                                                                                                                                                                                                                                                                                                                                                                                                                                                                                                                                                                                                                                                                                                                                                              |  |  |  |                                                                                                                                                                                                                                                                                                                                                                                                                   |  |  |  |  |  |  |  |  |
| Mode of delivery Spontaneous cephalic <input type="checkbox"/> Instrumental <input type="checkbox"/> Breech <input type="checkbox"/>                                                                                                                                                     |                                                                                                                                                                                                                                                                                                                                                                                                                                                                                                                                                                                                                                                                                                                                                                                                                                                                              |  |  |  |                                                                                                                                                                                                                                                                                                                                                                                                                   |  |  |  |  |  |  |  |  |
| Maturity Preterm (<37 wks) <input type="checkbox"/> Term (37 to 42 wks) <input type="checkbox"/> Post term (>42 wks) <input type="checkbox"/> Sex Male <input type="checkbox"/> Female <input type="checkbox"/>                                                                          |                                                                                                                                                                                                                                                                                                                                                                                                                                                                                                                                                                                                                                                                                                                                                                                                                                                                              |  |  |  |                                                                                                                                                                                                                                                                                                                                                                                                                   |  |  |  |  |  |  |  |  |
| Weight <table border="1" style="display: inline-table; border-collapse: collapse;"><tr><td style="width: 15px; height: 15px;"></td><td style="width: 15px; height: 15px;"></td><td style="width: 15px; height: 15px;"></td><td style="width: 15px; height: 15px;"></td></tr></table> gms |                                                                                                                                                                                                                                                                                                                                                                                                                                                                                                                                                                                                                                                                                                                                                                                                                                                                              |  |  |  | Breastfeeding initiated Time <table border="1" style="display: inline-table; border-collapse: collapse;"><tr><td style="width: 15px; height: 15px;"></td><td style="width: 15px; height: 15px;"></td></tr></table> hrs <table border="1" style="display: inline-table; border-collapse: collapse;"><tr><td style="width: 15px; height: 15px;"></td><td style="width: 15px; height: 15px;"></td></tr></table> mins |  |  |  |  |  |  |  |  |
|                                                                                                                                                                                                                                                                                          |                                                                                                                                                                                                                                                                                                                                                                                                                                                                                                                                                                                                                                                                                                                                                                                                                                                                              |  |  |  |                                                                                                                                                                                                                                                                                                                                                                                                                   |  |  |  |  |  |  |  |  |
|                                                                                                                                                                                                                                                                                          |                                                                                                                                                                                                                                                                                                                                                                                                                                                                                                                                                                                                                                                                                                                                                                                                                                                                              |  |  |  |                                                                                                                                                                                                                                                                                                                                                                                                                   |  |  |  |  |  |  |  |  |
|                                                                                                                                                                                                                                                                                          |                                                                                                                                                                                                                                                                                                                                                                                                                                                                                                                                                                                                                                                                                                                                                                                                                                                                              |  |  |  |                                                                                                                                                                                                                                                                                                                                                                                                                   |  |  |  |  |  |  |  |  |
| Newborn Immunization and medications provided BCG <input type="checkbox"/> 0 OPV <input type="checkbox"/> 0 Hepatitis B <input type="checkbox"/> Vit K <input type="checkbox"/>                                                                                                          |                                                                                                                                                                                                                                                                                                                                                                                                                                                                                                                                                                                                                                                                                                                                                                                                                                                                              |  |  |  |                                                                                                                                                                                                                                                                                                                                                                                                                   |  |  |  |  |  |  |  |  |
| D. FOLLOW UP IN THE COMMUNITY                                                                                                                                                                                                                                                            |                                                                                                                                                                                                                                                                                                                                                                                                                                                                                                                                                                                                                                                                                                                                                                                                                                                                              |  |  |  |                                                                                                                                                                                                                                                                                                                                                                                                                   |  |  |  |  |  |  |  |  |
| Informed ANM and ASHA Y <input type="checkbox"/> N <input type="checkbox"/>                                                                                                                                                                                                              |                                                                                                                                                                                                                                                                                                                                                                                                                                                                                                                                                                                                                                                                                                                                                                                                                                                                              |  |  |  |                                                                                                                                                                                                                                                                                                                                                                                                                   |  |  |  |  |  |  |  |  |
| Name of the ANM _____                                                                                                                                                                                                                                                                    | Telephone number _____                                                                                                                                                                                                                                                                                                                                                                                                                                                                                                                                                                                                                                                                                                                                                                                                                                                       |  |  |  |                                                                                                                                                                                                                                                                                                                                                                                                                   |  |  |  |  |  |  |  |  |
| Name of the ASHA _____                                                                                                                                                                                                                                                                   | Telephone number _____                                                                                                                                                                                                                                                                                                                                                                                                                                                                                                                                                                                                                                                                                                                                                                                                                                                       |  |  |  |                                                                                                                                                                                                                                                                                                                                                                                                                   |  |  |  |  |  |  |  |  |
| Follow up instructions for ANM/ ASHA Y <input type="checkbox"/> N <input type="checkbox"/> If Yes, Specify                                                                                                                                                                               |                                                                                                                                                                                                                                                                                                                                                                                                                                                                                                                                                                                                                                                                                                                                                                                                                                                                              |  |  |  |                                                                                                                                                                                                                                                                                                                                                                                                                   |  |  |  |  |  |  |  |  |
| _____                                                                                                                                                                                                                                                                                    |                                                                                                                                                                                                                                                                                                                                                                                                                                                                                                                                                                                                                                                                                                                                                                                                                                                                              |  |  |  |                                                                                                                                                                                                                                                                                                                                                                                                                   |  |  |  |  |  |  |  |  |
| _____                                                                                                                                                                                                                                                                                    |                                                                                                                                                                                                                                                                                                                                                                                                                                                                                                                                                                                                                                                                                                                                                                                                                                                                              |  |  |  |                                                                                                                                                                                                                                                                                                                                                                                                                   |  |  |  |  |  |  |  |  |
| Date of follow up at PHC _____                                                                                                                                                                                                                                                           |                                                                                                                                                                                                                                                                                                                                                                                                                                                                                                                                                                                                                                                                                                                                                                                                                                                                              |  |  |  |                                                                                                                                                                                                                                                                                                                                                                                                                   |  |  |  |  |  |  |  |  |
| Name of the staff _____                                                                                                                                                                                                                                                                  | Signature _____                                                                                                                                                                                                                                                                                                                                                                                                                                                                                                                                                                                                                                                                                                                                                                                                                                                              |  |  |  |                                                                                                                                                                                                                                                                                                                                                                                                                   |  |  |  |  |  |  |  |  |

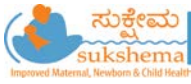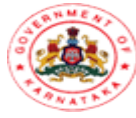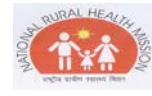

COMPLICATION CASE SHEET A

For initial management and referral for pregnant women with prolonged/ obstructed labour/ rupture of membranes >12 hours  
Send a copy of the case sheet along with this sheet to the referral facility

|                                                                                                                                                                                                                                                                                                                                                                                                                                                                                                                                                                                                                                                                                                                                                                                                                                                                                                                                                                     |                                                                                                                                                                                                                                                                                                                                                                                                                                                                                                                                                                                                                                                                                                                                                                                                                                                                                                                                                                                                                                                                                                                                                                                                                                                                                                                                                                                                                                                                                                                                                                                                                                                                                                                                                                                                                                                                                                                                                                                                                                                                                                                                                                                                                                                                                                                                                                                                                                                                                                                      |  |  |  |  |  |  |  |  |
|---------------------------------------------------------------------------------------------------------------------------------------------------------------------------------------------------------------------------------------------------------------------------------------------------------------------------------------------------------------------------------------------------------------------------------------------------------------------------------------------------------------------------------------------------------------------------------------------------------------------------------------------------------------------------------------------------------------------------------------------------------------------------------------------------------------------------------------------------------------------------------------------------------------------------------------------------------------------|----------------------------------------------------------------------------------------------------------------------------------------------------------------------------------------------------------------------------------------------------------------------------------------------------------------------------------------------------------------------------------------------------------------------------------------------------------------------------------------------------------------------------------------------------------------------------------------------------------------------------------------------------------------------------------------------------------------------------------------------------------------------------------------------------------------------------------------------------------------------------------------------------------------------------------------------------------------------------------------------------------------------------------------------------------------------------------------------------------------------------------------------------------------------------------------------------------------------------------------------------------------------------------------------------------------------------------------------------------------------------------------------------------------------------------------------------------------------------------------------------------------------------------------------------------------------------------------------------------------------------------------------------------------------------------------------------------------------------------------------------------------------------------------------------------------------------------------------------------------------------------------------------------------------------------------------------------------------------------------------------------------------------------------------------------------------------------------------------------------------------------------------------------------------------------------------------------------------------------------------------------------------------------------------------------------------------------------------------------------------------------------------------------------------------------------------------------------------------------------------------------------------|--|--|--|--|--|--|--|--|
| <b>A.BACKGROUND INFORMATION</b>                                                                                                                                                                                                                                                                                                                                                                                                                                                                                                                                                                                                                                                                                                                                                                                                                                                                                                                                     |                                                                                                                                                                                                                                                                                                                                                                                                                                                                                                                                                                                                                                                                                                                                                                                                                                                                                                                                                                                                                                                                                                                                                                                                                                                                                                                                                                                                                                                                                                                                                                                                                                                                                                                                                                                                                                                                                                                                                                                                                                                                                                                                                                                                                                                                                                                                                                                                                                                                                                                      |  |  |  |  |  |  |  |  |
| District _____ Taluka _____ PHC Location _____                                                                                                                                                                                                                                                                                                                                                                                                                                                                                                                                                                                                                                                                                                                                                                                                                                                                                                                      |                                                                                                                                                                                                                                                                                                                                                                                                                                                                                                                                                                                                                                                                                                                                                                                                                                                                                                                                                                                                                                                                                                                                                                                                                                                                                                                                                                                                                                                                                                                                                                                                                                                                                                                                                                                                                                                                                                                                                                                                                                                                                                                                                                                                                                                                                                                                                                                                                                                                                                                      |  |  |  |  |  |  |  |  |
| Name _____ Thaiy card number <table border="1" style="display: inline-table; border-collapse: collapse;"><tr><td style="width: 20px; height: 20px;"></td><td style="width: 20px; height: 20px;"></td></tr></table>                                                                                                                                                                                                                                                                                                                                                                                                                                                                          |                                                                                                                                                                                                                                                                                                                                                                                                                                                                                                                                                                                                                                                                                                                                                                                                                                                                                                                                                                                                                                                                                                                                                                                                                                                                                                                                                                                                                                                                                                                                                                                                                                                                                                                                                                                                                                                                                                                                                                                                                                                                                                                                                                                                                                                                                                                                                                                                                                                                                                                      |  |  |  |  |  |  |  |  |
|                                                                                                                                                                                                                                                                                                                                                                                                                                                                                                                                                                                                                                                                                                                                                                                                                                                                                                                                                                     |                                                                                                                                                                                                                                                                                                                                                                                                                                                                                                                                                                                                                                                                                                                                                                                                                                                                                                                                                                                                                                                                                                                                                                                                                                                                                                                                                                                                                                                                                                                                                                                                                                                                                                                                                                                                                                                                                                                                                                                                                                                                                                                                                                                                                                                                                                                                                                                                                                                                                                                      |  |  |  |  |  |  |  |  |
| Address _____                                                                                                                                                                                                                                                                                                                                                                                                                                                                                                                                                                                                                                                                                                                                                                                                                                                                                                                                                       |                                                                                                                                                                                                                                                                                                                                                                                                                                                                                                                                                                                                                                                                                                                                                                                                                                                                                                                                                                                                                                                                                                                                                                                                                                                                                                                                                                                                                                                                                                                                                                                                                                                                                                                                                                                                                                                                                                                                                                                                                                                                                                                                                                                                                                                                                                                                                                                                                                                                                                                      |  |  |  |  |  |  |  |  |
| <b>B.SPECIFIC DIAGNOSIS AND INITIAL MANAGEMENT</b>                                                                                                                                                                                                                                                                                                                                                                                                                                                                                                                                                                                                                                                                                                                                                                                                                                                                                                                  |                                                                                                                                                                                                                                                                                                                                                                                                                                                                                                                                                                                                                                                                                                                                                                                                                                                                                                                                                                                                                                                                                                                                                                                                                                                                                                                                                                                                                                                                                                                                                                                                                                                                                                                                                                                                                                                                                                                                                                                                                                                                                                                                                                                                                                                                                                                                                                                                                                                                                                                      |  |  |  |  |  |  |  |  |
| <b>Diagnosis (Tick a, b or c)</b>                                                                                                                                                                                                                                                                                                                                                                                                                                                                                                                                                                                                                                                                                                                                                                                                                                                                                                                                   | <b>Initial management at the PHC (Tick when management done)</b>                                                                                                                                                                                                                                                                                                                                                                                                                                                                                                                                                                                                                                                                                                                                                                                                                                                                                                                                                                                                                                                                                                                                                                                                                                                                                                                                                                                                                                                                                                                                                                                                                                                                                                                                                                                                                                                                                                                                                                                                                                                                                                                                                                                                                                                                                                                                                                                                                                                     |  |  |  |  |  |  |  |  |
| <p><b>a. <input type="checkbox"/> Prolonged labour</b> (Any one of the following must be present. Tick boxes as appropriate)</p> <p><input type="checkbox"/> Plotted cervical dilatation line in the partograph is to the right of Line A at the four hour and eight hour assessments</p> <p><input type="checkbox"/> Contractions do not increase in frequency and duration</p> <p><input type="checkbox"/> Cervix not dilated beyond 4 cm after 8 hrs of regular contractions</p> <p><input type="checkbox"/> Cervix not dilating at least 1 cm an hour in active labour (regular contractions and initial PV of 3-4 cm)</p> <p><input type="checkbox"/> No cervical change with repeat PV after 4 hours in active phase of labour</p> <p><input type="checkbox"/> Full dilation of cervix but no descent of foetal head despite maternal pushing efforts</p> <p><input type="checkbox"/> Two contractions or less in 10 minutes lasting less than 40 seconds</p> | <p style="text-align: center;"><u>THESE ARE OBSTETRIC EMERGENCIES</u></p> <p><input type="checkbox"/> Call and determine the nearest facility where a caesarean section can be done if necessary</p> <p><input type="checkbox"/> Arrange transport</p> <p><input type="checkbox"/> Keep the woman nil per orally (NPO)</p> <p><input type="checkbox"/> Do NOT give Oxytocin</p> <p><input type="checkbox"/> Insert 16-18 gauge IV and give IV Normal Saline or Ringer's Lactate or 5% Dextrose Normal Saline at 30 drops per min</p> <p><input type="checkbox"/> Insert Foley's catheter in case of prolonged/obstructed labour</p> <p>Reason if not given _____</p> <p><b>Give the following antibiotics</b></p> <p><input type="checkbox"/> Ampicillin 1g Orally <input type="checkbox"/> or IV <input type="checkbox"/> and</p> <p><input type="checkbox"/> Metronidazole 400mg Orally <input type="checkbox"/> or 500mg IV <input type="checkbox"/> and</p> <p><input type="checkbox"/> Gentamicin 80mg IM <input type="checkbox"/> or IV <input type="checkbox"/></p> <p>Reason if not given _____</p> <p>Any other antibiotics given (specify) _____</p> <p><b>If gestational age is between 24 and 34 weeks</b></p> <p><input type="checkbox"/> Give corticosteroids either Betamethasone IM 12mg <input type="checkbox"/> or Dexamethasone IM 6 mg <input type="checkbox"/></p> <p>Reason if not given _____</p> <p>Date <table border="1" style="display: inline-table; border-collapse: collapse;"><tr><td style="width: 20px; height: 20px;"></td><td style="width: 20px; height: 20px;"></td><td style="width: 20px; height: 20px;"></td><td style="width: 20px; height: 20px;"></td></tr></table> Time <table border="1" style="display: inline-table; border-collapse: collapse;"><tr><td style="width: 20px; height: 20px;"></td><td style="width: 20px; height: 20px;"></td><td style="width: 20px; height: 20px;"></td><td style="width: 20px; height: 20px;"></td></tr></table></p> <p><b>Arrange for the following during transportation</b></p> <p><input type="checkbox"/> Keep the woman in left lateral position</p> <p><input type="checkbox"/> Continue fluid and carry extra bottles to last till she reaches the facility</p> <p><input type="checkbox"/> Give oxygen if foetal distress is present</p> <p><input type="checkbox"/> Keep a delivery set and essential drugs handy</p> <p><input type="checkbox"/> SN accompanies the woman and monitors fluid intake and urine output</p> |  |  |  |  |  |  |  |  |
|                                                                                                                                                                                                                                                                                                                                                                                                                                                                                                                                                                                                                                                                                                                                                                                                                                                                                                                                                                     |                                                                                                                                                                                                                                                                                                                                                                                                                                                                                                                                                                                                                                                                                                                                                                                                                                                                                                                                                                                                                                                                                                                                                                                                                                                                                                                                                                                                                                                                                                                                                                                                                                                                                                                                                                                                                                                                                                                                                                                                                                                                                                                                                                                                                                                                                                                                                                                                                                                                                                                      |  |  |  |  |  |  |  |  |
|                                                                                                                                                                                                                                                                                                                                                                                                                                                                                                                                                                                                                                                                                                                                                                                                                                                                                                                                                                     |                                                                                                                                                                                                                                                                                                                                                                                                                                                                                                                                                                                                                                                                                                                                                                                                                                                                                                                                                                                                                                                                                                                                                                                                                                                                                                                                                                                                                                                                                                                                                                                                                                                                                                                                                                                                                                                                                                                                                                                                                                                                                                                                                                                                                                                                                                                                                                                                                                                                                                                      |  |  |  |  |  |  |  |  |
| <p><b>b. <input type="checkbox"/> Obstructed labour</b> (Any two of the following must be present. Tick boxes as appropriate)</p> <p><input type="checkbox"/> Plotted cervical dilatation line in the partograph is to the right of Line A at the four hour and eight hour assessments</p> <p><input type="checkbox"/> No cervical change (secondary arrest) with repeat PV after 4 hours in active phase of labour</p> <p><input type="checkbox"/> Significant caput and moulding</p> <p><input type="checkbox"/> Cervix that is not well applied to presenting part</p> <p><input type="checkbox"/> Swollen, oedematous cervix</p> <p><input type="checkbox"/> Ballooning lower uterine segment</p> <p><input type="checkbox"/> Formation of retraction band felt over abdomen</p> <p><input type="checkbox"/> Foetal or maternal distress</p> <p><input type="checkbox"/> Labour that is longer than 24 hours duration</p>                                       |                                                                                                                                                                                                                                                                                                                                                                                                                                                                                                                                                                                                                                                                                                                                                                                                                                                                                                                                                                                                                                                                                                                                                                                                                                                                                                                                                                                                                                                                                                                                                                                                                                                                                                                                                                                                                                                                                                                                                                                                                                                                                                                                                                                                                                                                                                                                                                                                                                                                                                                      |  |  |  |  |  |  |  |  |
| <p><b>c. <input type="checkbox"/> Woman has rupture of membranes for greater than 12 hours after 37 weeks of pregnancy with or without contractions</b></p>                                                                                                                                                                                                                                                                                                                                                                                                                                                                                                                                                                                                                                                                                                                                                                                                         |                                                                                                                                                                                                                                                                                                                                                                                                                                                                                                                                                                                                                                                                                                                                                                                                                                                                                                                                                                                                                                                                                                                                                                                                                                                                                                                                                                                                                                                                                                                                                                                                                                                                                                                                                                                                                                                                                                                                                                                                                                                                                                                                                                                                                                                                                                                                                                                                                                                                                                                      |  |  |  |  |  |  |  |  |
| <b>C. CONDITION AT THE TIME OF REFERRAL</b>                                                                                                                                                                                                                                                                                                                                                                                                                                                                                                                                                                                                                                                                                                                                                                                                                                                                                                                         |                                                                                                                                                                                                                                                                                                                                                                                                                                                                                                                                                                                                                                                                                                                                                                                                                                                                                                                                                                                                                                                                                                                                                                                                                                                                                                                                                                                                                                                                                                                                                                                                                                                                                                                                                                                                                                                                                                                                                                                                                                                                                                                                                                                                                                                                                                                                                                                                                                                                                                                      |  |  |  |  |  |  |  |  |
| Consciousness Conscious <input type="checkbox"/> Semiconscious <input type="checkbox"/> Unconscious <input type="checkbox"/> Pulse _____/min BP _____mmHg                                                                                                                                                                                                                                                                                                                                                                                                                                                                                                                                                                                                                                                                                                                                                                                                           |                                                                                                                                                                                                                                                                                                                                                                                                                                                                                                                                                                                                                                                                                                                                                                                                                                                                                                                                                                                                                                                                                                                                                                                                                                                                                                                                                                                                                                                                                                                                                                                                                                                                                                                                                                                                                                                                                                                                                                                                                                                                                                                                                                                                                                                                                                                                                                                                                                                                                                                      |  |  |  |  |  |  |  |  |
| Temperature _____°C Respiration _____/min FHR _____/min other (specify) _____                                                                                                                                                                                                                                                                                                                                                                                                                                                                                                                                                                                                                                                                                                                                                                                                                                                                                       |                                                                                                                                                                                                                                                                                                                                                                                                                                                                                                                                                                                                                                                                                                                                                                                                                                                                                                                                                                                                                                                                                                                                                                                                                                                                                                                                                                                                                                                                                                                                                                                                                                                                                                                                                                                                                                                                                                                                                                                                                                                                                                                                                                                                                                                                                                                                                                                                                                                                                                                      |  |  |  |  |  |  |  |  |
| <b>D.REFERRAL DETAILS</b>                                                                                                                                                                                                                                                                                                                                                                                                                                                                                                                                                                                                                                                                                                                                                                                                                                                                                                                                           |                                                                                                                                                                                                                                                                                                                                                                                                                                                                                                                                                                                                                                                                                                                                                                                                                                                                                                                                                                                                                                                                                                                                                                                                                                                                                                                                                                                                                                                                                                                                                                                                                                                                                                                                                                                                                                                                                                                                                                                                                                                                                                                                                                                                                                                                                                                                                                                                                                                                                                                      |  |  |  |  |  |  |  |  |
| Date diagnosis made <table border="1" style="display: inline-table; border-collapse: collapse;"><tr><td style="width: 20px; height: 20px;"></td><td style="width: 20px; height: 20px;"></td><td style="width: 20px; height: 20px;"></td><td style="width: 20px; height: 20px;"></td></tr></table> Time diagnosis made <table border="1" style="display: inline-table; border-collapse: collapse;"><tr><td style="width: 20px; height: 20px;"></td><td style="width: 20px; height: 20px;"></td></tr></table> hrs <table border="1" style="display: inline-table; border-collapse: collapse;"><tr><td style="width: 20px; height: 20px;"></td><td style="width: 20px; height: 20px;"></td></tr></table> mins                                                                                                                                                                                                                                                          |                                                                                                                                                                                                                                                                                                                                                                                                                                                                                                                                                                                                                                                                                                                                                                                                                                                                                                                                                                                                                                                                                                                                                                                                                                                                                                                                                                                                                                                                                                                                                                                                                                                                                                                                                                                                                                                                                                                                                                                                                                                                                                                                                                                                                                                                                                                                                                                                                                                                                                                      |  |  |  |  |  |  |  |  |
|                                                                                                                                                                                                                                                                                                                                                                                                                                                                                                                                                                                                                                                                                                                                                                                                                                                                                                                                                                     |                                                                                                                                                                                                                                                                                                                                                                                                                                                                                                                                                                                                                                                                                                                                                                                                                                                                                                                                                                                                                                                                                                                                                                                                                                                                                                                                                                                                                                                                                                                                                                                                                                                                                                                                                                                                                                                                                                                                                                                                                                                                                                                                                                                                                                                                                                                                                                                                                                                                                                                      |  |  |  |  |  |  |  |  |
|                                                                                                                                                                                                                                                                                                                                                                                                                                                                                                                                                                                                                                                                                                                                                                                                                                                                                                                                                                     |                                                                                                                                                                                                                                                                                                                                                                                                                                                                                                                                                                                                                                                                                                                                                                                                                                                                                                                                                                                                                                                                                                                                                                                                                                                                                                                                                                                                                                                                                                                                                                                                                                                                                                                                                                                                                                                                                                                                                                                                                                                                                                                                                                                                                                                                                                                                                                                                                                                                                                                      |  |  |  |  |  |  |  |  |
|                                                                                                                                                                                                                                                                                                                                                                                                                                                                                                                                                                                                                                                                                                                                                                                                                                                                                                                                                                     |                                                                                                                                                                                                                                                                                                                                                                                                                                                                                                                                                                                                                                                                                                                                                                                                                                                                                                                                                                                                                                                                                                                                                                                                                                                                                                                                                                                                                                                                                                                                                                                                                                                                                                                                                                                                                                                                                                                                                                                                                                                                                                                                                                                                                                                                                                                                                                                                                                                                                                                      |  |  |  |  |  |  |  |  |
| Diagnosed by SN <input type="checkbox"/> MO <input type="checkbox"/> Other <input type="checkbox"/> Staff name _____ Signature _____                                                                                                                                                                                                                                                                                                                                                                                                                                                                                                                                                                                                                                                                                                                                                                                                                                |                                                                                                                                                                                                                                                                                                                                                                                                                                                                                                                                                                                                                                                                                                                                                                                                                                                                                                                                                                                                                                                                                                                                                                                                                                                                                                                                                                                                                                                                                                                                                                                                                                                                                                                                                                                                                                                                                                                                                                                                                                                                                                                                                                                                                                                                                                                                                                                                                                                                                                                      |  |  |  |  |  |  |  |  |
| Details of facility to which the woman is referred Name _____ Location _____ District _____                                                                                                                                                                                                                                                                                                                                                                                                                                                                                                                                                                                                                                                                                                                                                                                                                                                                         |                                                                                                                                                                                                                                                                                                                                                                                                                                                                                                                                                                                                                                                                                                                                                                                                                                                                                                                                                                                                                                                                                                                                                                                                                                                                                                                                                                                                                                                                                                                                                                                                                                                                                                                                                                                                                                                                                                                                                                                                                                                                                                                                                                                                                                                                                                                                                                                                                                                                                                                      |  |  |  |  |  |  |  |  |
| _____ Taluka _____ Type CHC <input type="checkbox"/> TH <input type="checkbox"/> DH <input type="checkbox"/> Private <input type="checkbox"/> Other <input type="checkbox"/> (specify) _____                                                                                                                                                                                                                                                                                                                                                                                                                                                                                                                                                                                                                                                                                                                                                                        |                                                                                                                                                                                                                                                                                                                                                                                                                                                                                                                                                                                                                                                                                                                                                                                                                                                                                                                                                                                                                                                                                                                                                                                                                                                                                                                                                                                                                                                                                                                                                                                                                                                                                                                                                                                                                                                                                                                                                                                                                                                                                                                                                                                                                                                                                                                                                                                                                                                                                                                      |  |  |  |  |  |  |  |  |
| Person to contact _____ Telephone # _____                                                                                                                                                                                                                                                                                                                                                                                                                                                                                                                                                                                                                                                                                                                                                                                                                                                                                                                           |                                                                                                                                                                                                                                                                                                                                                                                                                                                                                                                                                                                                                                                                                                                                                                                                                                                                                                                                                                                                                                                                                                                                                                                                                                                                                                                                                                                                                                                                                                                                                                                                                                                                                                                                                                                                                                                                                                                                                                                                                                                                                                                                                                                                                                                                                                                                                                                                                                                                                                                      |  |  |  |  |  |  |  |  |
| Date left PHC <table border="1" style="display: inline-table; border-collapse: collapse;"><tr><td style="width: 20px; height: 20px;"></td><td style="width: 20px; height: 20px;"></td><td style="width: 20px; height: 20px;"></td><td style="width: 20px; height: 20px;"></td></tr></table> Time left PHC <table border="1" style="display: inline-table; border-collapse: collapse;"><tr><td style="width: 20px; height: 20px;"></td><td style="width: 20px; height: 20px;"></td></tr></table> <table border="1" style="display: inline-table; border-collapse: collapse;"><tr><td style="width: 20px; height: 20px;"></td><td style="width: 20px; height: 20px;"></td></tr></table>                                                                                                                                                                                                                                                                               |                                                                                                                                                                                                                                                                                                                                                                                                                                                                                                                                                                                                                                                                                                                                                                                                                                                                                                                                                                                                                                                                                                                                                                                                                                                                                                                                                                                                                                                                                                                                                                                                                                                                                                                                                                                                                                                                                                                                                                                                                                                                                                                                                                                                                                                                                                                                                                                                                                                                                                                      |  |  |  |  |  |  |  |  |
|                                                                                                                                                                                                                                                                                                                                                                                                                                                                                                                                                                                                                                                                                                                                                                                                                                                                                                                                                                     |                                                                                                                                                                                                                                                                                                                                                                                                                                                                                                                                                                                                                                                                                                                                                                                                                                                                                                                                                                                                                                                                                                                                                                                                                                                                                                                                                                                                                                                                                                                                                                                                                                                                                                                                                                                                                                                                                                                                                                                                                                                                                                                                                                                                                                                                                                                                                                                                                                                                                                                      |  |  |  |  |  |  |  |  |
|                                                                                                                                                                                                                                                                                                                                                                                                                                                                                                                                                                                                                                                                                                                                                                                                                                                                                                                                                                     |                                                                                                                                                                                                                                                                                                                                                                                                                                                                                                                                                                                                                                                                                                                                                                                                                                                                                                                                                                                                                                                                                                                                                                                                                                                                                                                                                                                                                                                                                                                                                                                                                                                                                                                                                                                                                                                                                                                                                                                                                                                                                                                                                                                                                                                                                                                                                                                                                                                                                                                      |  |  |  |  |  |  |  |  |
|                                                                                                                                                                                                                                                                                                                                                                                                                                                                                                                                                                                                                                                                                                                                                                                                                                                                                                                                                                     |                                                                                                                                                                                                                                                                                                                                                                                                                                                                                                                                                                                                                                                                                                                                                                                                                                                                                                                                                                                                                                                                                                                                                                                                                                                                                                                                                                                                                                                                                                                                                                                                                                                                                                                                                                                                                                                                                                                                                                                                                                                                                                                                                                                                                                                                                                                                                                                                                                                                                                                      |  |  |  |  |  |  |  |  |
| Type of vehicle used for transportation 108 <input type="checkbox"/> Ambulance Govt. <input type="checkbox"/> Ambulance Pvt <input type="checkbox"/> Other specify <input type="checkbox"/> _____                                                                                                                                                                                                                                                                                                                                                                                                                                                                                                                                                                                                                                                                                                                                                                   |                                                                                                                                                                                                                                                                                                                                                                                                                                                                                                                                                                                                                                                                                                                                                                                                                                                                                                                                                                                                                                                                                                                                                                                                                                                                                                                                                                                                                                                                                                                                                                                                                                                                                                                                                                                                                                                                                                                                                                                                                                                                                                                                                                                                                                                                                                                                                                                                                                                                                                                      |  |  |  |  |  |  |  |  |
| Outcome of referral Discharged healthy <input type="checkbox"/> Died <input type="checkbox"/> Date <table border="1" style="display: inline-table; border-collapse: collapse;"><tr><td style="width: 20px; height: 20px;"></td><td style="width: 20px; height: 20px;"></td><td style="width: 20px; height: 20px;"></td><td style="width: 20px; height: 20px;"></td></tr></table> Time <table border="1" style="display: inline-table; border-collapse: collapse;"><tr><td style="width: 20px; height: 20px;"></td><td style="width: 20px; height: 20px;"></td></tr></table> hrs <table border="1" style="display: inline-table; border-collapse: collapse;"><tr><td style="width: 20px; height: 20px;"></td><td style="width: 20px; height: 20px;"></td></tr></table> mins                                                                                                                                                                                          |                                                                                                                                                                                                                                                                                                                                                                                                                                                                                                                                                                                                                                                                                                                                                                                                                                                                                                                                                                                                                                                                                                                                                                                                                                                                                                                                                                                                                                                                                                                                                                                                                                                                                                                                                                                                                                                                                                                                                                                                                                                                                                                                                                                                                                                                                                                                                                                                                                                                                                                      |  |  |  |  |  |  |  |  |
|                                                                                                                                                                                                                                                                                                                                                                                                                                                                                                                                                                                                                                                                                                                                                                                                                                                                                                                                                                     |                                                                                                                                                                                                                                                                                                                                                                                                                                                                                                                                                                                                                                                                                                                                                                                                                                                                                                                                                                                                                                                                                                                                                                                                                                                                                                                                                                                                                                                                                                                                                                                                                                                                                                                                                                                                                                                                                                                                                                                                                                                                                                                                                                                                                                                                                                                                                                                                                                                                                                                      |  |  |  |  |  |  |  |  |
|                                                                                                                                                                                                                                                                                                                                                                                                                                                                                                                                                                                                                                                                                                                                                                                                                                                                                                                                                                     |                                                                                                                                                                                                                                                                                                                                                                                                                                                                                                                                                                                                                                                                                                                                                                                                                                                                                                                                                                                                                                                                                                                                                                                                                                                                                                                                                                                                                                                                                                                                                                                                                                                                                                                                                                                                                                                                                                                                                                                                                                                                                                                                                                                                                                                                                                                                                                                                                                                                                                                      |  |  |  |  |  |  |  |  |
|                                                                                                                                                                                                                                                                                                                                                                                                                                                                                                                                                                                                                                                                                                                                                                                                                                                                                                                                                                     |                                                                                                                                                                                                                                                                                                                                                                                                                                                                                                                                                                                                                                                                                                                                                                                                                                                                                                                                                                                                                                                                                                                                                                                                                                                                                                                                                                                                                                                                                                                                                                                                                                                                                                                                                                                                                                                                                                                                                                                                                                                                                                                                                                                                                                                                                                                                                                                                                                                                                                                      |  |  |  |  |  |  |  |  |

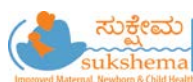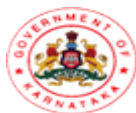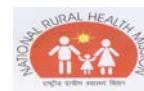

## COMPLICATION CASE SHEET B

For initial management and referral for women with pregnancy induced hypertension/ pre-eclampsia/ eclampsia (pregnant, in labour or postpartum). Send a copy of the case sheet along with this sheet to the referral facility

| A.BACKGROUND INFORMATION                                                                                                                                                                                                                             |                                                                                                                                                                                                                                                                                                                                                                                                                                                                                                                                                                                                                                                                                                                                                                                                                                                                                                                                                                                                                                                                                                                                                                                                                                                                                                 |  |  |  |  |  |  |  |  |
|------------------------------------------------------------------------------------------------------------------------------------------------------------------------------------------------------------------------------------------------------|-------------------------------------------------------------------------------------------------------------------------------------------------------------------------------------------------------------------------------------------------------------------------------------------------------------------------------------------------------------------------------------------------------------------------------------------------------------------------------------------------------------------------------------------------------------------------------------------------------------------------------------------------------------------------------------------------------------------------------------------------------------------------------------------------------------------------------------------------------------------------------------------------------------------------------------------------------------------------------------------------------------------------------------------------------------------------------------------------------------------------------------------------------------------------------------------------------------------------------------------------------------------------------------------------|--|--|--|--|--|--|--|--|
| District _____ Taluka _____ PHC Location _____                                                                                                                                                                                                       |                                                                                                                                                                                                                                                                                                                                                                                                                                                                                                                                                                                                                                                                                                                                                                                                                                                                                                                                                                                                                                                                                                                                                                                                                                                                                                 |  |  |  |  |  |  |  |  |
| Name _____ Thaiyi card number <table border="1" style="display: inline-table; vertical-align: middle;"><tr><td> </td><td> </td><td> </td><td> </td><td> </td><td> </td><td> </td><td> </td></tr></table>                                             |                                                                                                                                                                                                                                                                                                                                                                                                                                                                                                                                                                                                                                                                                                                                                                                                                                                                                                                                                                                                                                                                                                                                                                                                                                                                                                 |  |  |  |  |  |  |  |  |
|                                                                                                                                                                                                                                                      |                                                                                                                                                                                                                                                                                                                                                                                                                                                                                                                                                                                                                                                                                                                                                                                                                                                                                                                                                                                                                                                                                                                                                                                                                                                                                                 |  |  |  |  |  |  |  |  |
| Address _____                                                                                                                                                                                                                                        |                                                                                                                                                                                                                                                                                                                                                                                                                                                                                                                                                                                                                                                                                                                                                                                                                                                                                                                                                                                                                                                                                                                                                                                                                                                                                                 |  |  |  |  |  |  |  |  |
| B.SPECIFIC DIAGNOSIS AND INITIAL MANAGEMENT                                                                                                                                                                                                          |                                                                                                                                                                                                                                                                                                                                                                                                                                                                                                                                                                                                                                                                                                                                                                                                                                                                                                                                                                                                                                                                                                                                                                                                                                                                                                 |  |  |  |  |  |  |  |  |
| Diagnosis (Tick a, b, c, d or e)                                                                                                                                                                                                                     | Initial management at the PHC (Tick when management done)                                                                                                                                                                                                                                                                                                                                                                                                                                                                                                                                                                                                                                                                                                                                                                                                                                                                                                                                                                                                                                                                                                                                                                                                                                       |  |  |  |  |  |  |  |  |
| a. <input type="checkbox"/> Mild PIH (Tick boxes; all three must apply)<br><input type="checkbox"/> BP $\geq 140/90$ and $\leq 160/110$<br><input type="checkbox"/> No proteinuria<br><input type="checkbox"/> Gestation $\geq 20$ weeks             | <input type="checkbox"/> If either in labour or not in labour, call and determine the nearest facility where further laboratory assessment can be done and where labour induction, augmentation of labour and caesarean section could be done if necessary<br><input type="checkbox"/> If the delivery is imminent, conduct the delivery<br><input type="checkbox"/> If postpartum, call and determine the nearest facility that can do further laboratory assessment and management<br><input type="checkbox"/> Arrange transport                                                                                                                                                                                                                                                                                                                                                                                                                                                                                                                                                                                                                                                                                                                                                              |  |  |  |  |  |  |  |  |
| b. <input type="checkbox"/> Mild pre-eclampsia (Tick boxes; all three must be present)<br><input type="checkbox"/> BP $\geq 140/90$ and $\leq 160/110$<br><input type="checkbox"/> Proteinuria<br><input type="checkbox"/> Gestation $\geq 20$ weeks |                                                                                                                                                                                                                                                                                                                                                                                                                                                                                                                                                                                                                                                                                                                                                                                                                                                                                                                                                                                                                                                                                                                                                                                                                                                                                                 |  |  |  |  |  |  |  |  |
| c. <input type="checkbox"/> Severe PIH (Tick boxes; all three must apply)<br><input type="checkbox"/> BP $\geq 160/110$<br><input type="checkbox"/> No proteinuria<br><input type="checkbox"/> Gestation $\geq 20$ weeks                             | <input type="checkbox"/> If either in labour or not in labour, call and determine the nearest facility where labour induction, augmentation of labour and caesarean section could be done if necessary<br><input type="checkbox"/> If the delivery is imminent, conduct the delivery and refer to the same facility for observation and care<br><input type="checkbox"/> If postpartum, call and determine the nearest facility that can do further laboratory assessment and management<br><input type="checkbox"/> Arrange transport<br><b>Give the following</b><br><input type="checkbox"/> Antihypertensive, either Hydralazine 5mg IV <input type="checkbox"/> or Nifedipine 5mg Orally <input type="checkbox"/><br>Reason if not given _____<br><input type="checkbox"/> Start IV fluids Ringer's Lactate or Normal Saline or 5% Dextrose Normal Saline at 30 drops per min<br>Reason if not given _____<br><b>If gestational age is between 24 and 34 weeks</b><br><input type="checkbox"/> Give corticosteroids either Betamethasone IM 12mg <input type="checkbox"/> or Dexamethasone IM 6 mg <input type="checkbox"/><br>Reason if not given _____                                                                                                                                   |  |  |  |  |  |  |  |  |
| d. <input type="checkbox"/> Severe pre-eclampsia (Tick boxes; all three must be present)<br><input type="checkbox"/> BP $\geq 160/110$<br><input type="checkbox"/> Proteinuria<br><input type="checkbox"/> Gestation $\geq 20$ weeks                 | <p style="text-align: center;"><b>THIS IS AN OBSTETRIC EMERGENCY</b></p> <input type="checkbox"/> If either in labour or not in labour, call and determine the nearest facility where labour induction, labour augmentation and caesarean section could be done if necessary<br><input type="checkbox"/> If the delivery is imminent, conduct the delivery and refer to the same facility for observation and care<br><input type="checkbox"/> If postpartum, call and determine the nearest facility that can do further laboratory assessment and management<br><input type="checkbox"/> Arrange transport<br><b>Give the following</b><br><input type="checkbox"/> Oxygen<br><input type="checkbox"/> Antihypertensive, either Hydralazine 5mg IV <input type="checkbox"/> or Nifedipine 5mg Orally <input type="checkbox"/><br>Reason if not given _____<br><input type="checkbox"/> Magnesium Sulphate (preferred) 10ml (5gm) IM in each buttock total 20ml (10gm) or<br><input type="checkbox"/> Diazepam 20mg (4ml) Rectally in 10ml syringe <input type="checkbox"/> or 10mg IV slowly over 2 mins <input type="checkbox"/><br>Reason if not given _____<br><input type="checkbox"/> Start IV fluids Ringer's Lactate or Normal Saline or 5% Dextrose Normal Saline at 60 drops per min |  |  |  |  |  |  |  |  |

|                                                                                                                                                                                                                                                                                                                             |                                                                                                                                                                                                                                                                                                                                                                                                                                                                                                                                                                                                                                                                                                                                                                                                                                                                                                                                                                                                                                                                                                                                                                                                                                                                                                                                                                                                                                                                                                                                                                                                                                                                                                                                                                                                                                                                                                                                                                                                                                                                  |
|-----------------------------------------------------------------------------------------------------------------------------------------------------------------------------------------------------------------------------------------------------------------------------------------------------------------------------|------------------------------------------------------------------------------------------------------------------------------------------------------------------------------------------------------------------------------------------------------------------------------------------------------------------------------------------------------------------------------------------------------------------------------------------------------------------------------------------------------------------------------------------------------------------------------------------------------------------------------------------------------------------------------------------------------------------------------------------------------------------------------------------------------------------------------------------------------------------------------------------------------------------------------------------------------------------------------------------------------------------------------------------------------------------------------------------------------------------------------------------------------------------------------------------------------------------------------------------------------------------------------------------------------------------------------------------------------------------------------------------------------------------------------------------------------------------------------------------------------------------------------------------------------------------------------------------------------------------------------------------------------------------------------------------------------------------------------------------------------------------------------------------------------------------------------------------------------------------------------------------------------------------------------------------------------------------------------------------------------------------------------------------------------------------|
|                                                                                                                                                                                                                                                                                                                             | <input type="checkbox"/> Insert Foley's catheter<br><b>After giving Magnesium Sulphate, if respiratory rate decreases to &lt;16/min or if patellar deep tendon reflexes are absent,</b><br><input type="checkbox"/> Give Calcium Gluconate 1g IV over 10 mins<br><b>If gestational age is between 24 and 34 weeks</b><br><input type="checkbox"/> Give corticosteroids either Betamethasone IM 12mg <input type="checkbox"/> or Dexamethasone IM 6 mg <input type="checkbox"/><br>Reason if not given _____                                                                                                                                                                                                                                                                                                                                                                                                                                                                                                                                                                                                                                                                                                                                                                                                                                                                                                                                                                                                                                                                                                                                                                                                                                                                                                                                                                                                                                                                                                                                                      |
| e. <input type="checkbox"/> <b>Eclampsia</b> (First three must be present. Tick the fourth as appropriate)<br><input type="checkbox"/> BP $\geq$ 140/90<br><input type="checkbox"/> Fits/convulsions<br><input type="checkbox"/> Gestation $\geq$ 20 weeks up to 6 weeks postpartum<br><input type="checkbox"/> Proteinuria | <p style="text-align: center;"><b>THIS IS AN OBSTETRIC EMERGENCY</b></p> <input type="checkbox"/> <b>If either in labour or not in labour, call and determine the nearest facility where further laboratory assessment can be done and where labour induction, augmentation of labour and caesarean section could be done if necessary or</b><br><input type="checkbox"/> <b>If postpartum, call and determine the nearest facility that can do further laboratory assessment and management</b><br><input type="checkbox"/> <b>If the delivery is imminent, conduct the delivery and refer to the same facility for observation and care</b><br><input type="checkbox"/> <b>Arrange transport</b><br><input type="checkbox"/> <b>Clean mouth and nose, and put mouth gag. Do NOT restrain</b><br><b>Give following</b><br><input type="checkbox"/> Oxygen<br><input type="checkbox"/> Magnesium Sulphate (preferred) 10ml (5gm) IM in each buttock total 20ml (10gm) <b>or</b><br><input type="checkbox"/> Diazepam 20mg (4ml) Rectally in 10ml syringe <input type="checkbox"/> or 10mg IV slowly over 2 mins <input type="checkbox"/><br>Reason if not given _____<br><input type="checkbox"/> Start IV fluids Ringer's Lactate or Normal Saline or 5% Dextrose Normal Saline slowly<br><input type="checkbox"/> Insert Foley's catheter<br>Reason if not given _____<br><b>If diastolic BP &gt;110 mmHg,</b><br><input type="checkbox"/> Give antihypertensive, either Hydralazine 5mg IV <input type="checkbox"/> or Nifedipine 5mg Orally <input type="checkbox"/><br>Reason if not given _____<br><b>After giving Magnesium Sulphate, if respiratory rate decreases to &lt;16/min or if patellar deep tendon reflexes are absent,</b><br><input type="checkbox"/> Give Calcium Gluconate 1g IV over 10 mins<br><b>If gestational age is between 24 and 34 weeks</b><br><input type="checkbox"/> Give corticosteroids either Betamethasone IM 12mg <input type="checkbox"/> or Dexamethasone IM 6 mg <input type="checkbox"/><br>Reason if not given _____ |

Date of management       Time of management   hrs   mins

**Arrange for the following during transportation**

- Keep the woman in left lateral position
- Continue fluid and carry extra bottles to last till she reaches the facility
- Give oxygen (if required)
- Keep a delivery set and essential drugs handy
- SN accompanies the woman and monitors fluid intake and urine output
- Ensure baby is kept warm, feedings continued if the woman is postpartum

**C. CONDITION AT THE TIME OF REFERRAL**

Consciousness Conscious  Semiconscious  Unconscious  Pulse \_\_\_\_\_/min BP \_\_\_\_\_mmHg  
Temperature \_\_\_\_°C Respiration \_\_\_\_\_/min FHR \_\_\_\_\_/min Patellar deep tendon reflex Present  Absent   
Urine output \_\_\_\_\_cc/hr Other specify \_\_\_\_\_

**D. REFERRAL DETAILS**

Date diagnosis made       Time diagnosis made   hrs   mins

Diagnosed by SN  MO  Other  Staff name \_\_\_\_\_ Signature \_\_\_\_\_

**Details of facility to which the woman is referred**

Name \_\_\_\_\_ Location \_\_\_\_\_ District \_\_\_\_\_ Taluka \_\_\_\_\_

Type CHC  TH  DH  Private  Other  (specify) \_\_\_\_\_

Person to contact \_\_\_\_\_ Telephone # \_\_\_\_\_

Date left PHC       Time left PHC

Type of vehicle used for transportation 108  Ambulance Govt.  Ambulance Pvt  Other specify  \_\_\_\_\_

Outcome of referral Discharged healthy  Died  Date       Time   hrs   mins



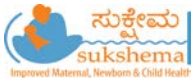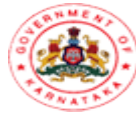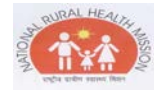

## COMPLICATION CASE SHEET C

For initial management and referral for pregnant women with antepartum haemorrhage

Send a copy of the case sheet along with this sheet to the referral facility

| A.BACKGROUND INFORMATION                                                                                                                                                                                                                                                                                                                                                                                                    |                                                                                                                                                                                                                                                                                                                                                                                                                                                                                                                                                                                                                                                                                                                                                                                                                                                                                                                                                                                                                                                                                                                                                                                                                                                                                                                                                                                                                                                                                                                                                                                                                                                                                                                                                                                                                                                                                                                                                                                                                                                                                                                                                                                                                                                                                                                                                                                                                                                                                                                                                                                                                                                                                                                                                                                                                                                                                                                                                                                                                                                                                                          |
|-----------------------------------------------------------------------------------------------------------------------------------------------------------------------------------------------------------------------------------------------------------------------------------------------------------------------------------------------------------------------------------------------------------------------------|----------------------------------------------------------------------------------------------------------------------------------------------------------------------------------------------------------------------------------------------------------------------------------------------------------------------------------------------------------------------------------------------------------------------------------------------------------------------------------------------------------------------------------------------------------------------------------------------------------------------------------------------------------------------------------------------------------------------------------------------------------------------------------------------------------------------------------------------------------------------------------------------------------------------------------------------------------------------------------------------------------------------------------------------------------------------------------------------------------------------------------------------------------------------------------------------------------------------------------------------------------------------------------------------------------------------------------------------------------------------------------------------------------------------------------------------------------------------------------------------------------------------------------------------------------------------------------------------------------------------------------------------------------------------------------------------------------------------------------------------------------------------------------------------------------------------------------------------------------------------------------------------------------------------------------------------------------------------------------------------------------------------------------------------------------------------------------------------------------------------------------------------------------------------------------------------------------------------------------------------------------------------------------------------------------------------------------------------------------------------------------------------------------------------------------------------------------------------------------------------------------------------------------------------------------------------------------------------------------------------------------------------------------------------------------------------------------------------------------------------------------------------------------------------------------------------------------------------------------------------------------------------------------------------------------------------------------------------------------------------------------------------------------------------------------------------------------------------------------|
| District _____ Taluka _____ PHC Location _____                                                                                                                                                                                                                                                                                                                                                                              |                                                                                                                                                                                                                                                                                                                                                                                                                                                                                                                                                                                                                                                                                                                                                                                                                                                                                                                                                                                                                                                                                                                                                                                                                                                                                                                                                                                                                                                                                                                                                                                                                                                                                                                                                                                                                                                                                                                                                                                                                                                                                                                                                                                                                                                                                                                                                                                                                                                                                                                                                                                                                                                                                                                                                                                                                                                                                                                                                                                                                                                                                                          |
| Name _____ Thaiyi card number _____                                                                                                                                                                                                                                                                                                                                                                                         |                                                                                                                                                                                                                                                                                                                                                                                                                                                                                                                                                                                                                                                                                                                                                                                                                                                                                                                                                                                                                                                                                                                                                                                                                                                                                                                                                                                                                                                                                                                                                                                                                                                                                                                                                                                                                                                                                                                                                                                                                                                                                                                                                                                                                                                                                                                                                                                                                                                                                                                                                                                                                                                                                                                                                                                                                                                                                                                                                                                                                                                                                                          |
| Address _____                                                                                                                                                                                                                                                                                                                                                                                                               |                                                                                                                                                                                                                                                                                                                                                                                                                                                                                                                                                                                                                                                                                                                                                                                                                                                                                                                                                                                                                                                                                                                                                                                                                                                                                                                                                                                                                                                                                                                                                                                                                                                                                                                                                                                                                                                                                                                                                                                                                                                                                                                                                                                                                                                                                                                                                                                                                                                                                                                                                                                                                                                                                                                                                                                                                                                                                                                                                                                                                                                                                                          |
| B.SPECIFIC DIAGNOSIS AND INITIAL MANAGEMENT                                                                                                                                                                                                                                                                                                                                                                                 |                                                                                                                                                                                                                                                                                                                                                                                                                                                                                                                                                                                                                                                                                                                                                                                                                                                                                                                                                                                                                                                                                                                                                                                                                                                                                                                                                                                                                                                                                                                                                                                                                                                                                                                                                                                                                                                                                                                                                                                                                                                                                                                                                                                                                                                                                                                                                                                                                                                                                                                                                                                                                                                                                                                                                                                                                                                                                                                                                                                                                                                                                                          |
| Diagnosis (Tick a, b or c)                                                                                                                                                                                                                                                                                                                                                                                                  | Initial management at the PHC (Tick when management done)                                                                                                                                                                                                                                                                                                                                                                                                                                                                                                                                                                                                                                                                                                                                                                                                                                                                                                                                                                                                                                                                                                                                                                                                                                                                                                                                                                                                                                                                                                                                                                                                                                                                                                                                                                                                                                                                                                                                                                                                                                                                                                                                                                                                                                                                                                                                                                                                                                                                                                                                                                                                                                                                                                                                                                                                                                                                                                                                                                                                                                                |
| <p>a. <input type="checkbox"/> <b>Placental abruption</b> (First two must be present. Tick third as appropriate)</p> <p><input type="checkbox"/> Abdominal pain (if contractions are present and the pain is present in between contractions)</p> <p><input type="checkbox"/> Tense or tender uterus on palpation</p> <p><input type="checkbox"/> Bleeding from the vagina (if concealed there may be no bleeding seen)</p> | <p><b>THESE ARE OBSTETRIC EMERGENCIES – DO NOT PERFORM VAGINAL EXAM</b></p> <p><input type="checkbox"/> Call and determine the nearest facility where a caesarean section can be done if necessary and the required blood type is available</p> <p><input type="checkbox"/> Arrange transport <input type="checkbox"/> Arrange for a blood donor <input type="checkbox"/> Give oxygen</p> <p><input type="checkbox"/> Insert Foley's catheter <input type="checkbox"/> Keep the woman NPO <input type="checkbox"/> Do NOT give Oxytocin</p> <p>Record vital signs Pulse ___/min BP _____mmHg Respiration ___/min Temp ___°C</p> <p><b>If the woman is in shock (systolic BP &lt;90 mmHg, and/or pulse &gt;110/minute) or she is bleeding heavily (soaking one pad in less than 5 minutes)</b></p> <p><input type="checkbox"/> Insert 16-18 gauge IV and give IV Normal Saline or Ringer's Lactate or 5 % Dextrose Normal Saline at 60 drops per min for the first 1 litre (2 bottles) <input type="checkbox"/> Next 500ml (1 bottle) at 30 drops per min <input type="checkbox"/> Repeat if necessary</p> <p><b>If the systolic BP increases to ≥100 mmHg and pulse slows down to &lt;100/min,</b></p> <p><input type="checkbox"/> Slow the IV drip to 3 drops per min <input type="checkbox"/> Keep the woman warm, keep her feet elevated</p> <p><b>If the woman is not in shock or she is not bleeding heavily</b></p> <p><input type="checkbox"/> Insert 16-18 gauge IV and give IV Normal Saline or Ringer's Lactate or 5% Dextrose Normal Saline at 30 drops per min 500ml (1 bottle) <input type="checkbox"/> Repeat if necessary</p> <p><b>If ruptured uterus is suspected, give the following antibiotics</b></p> <p><input type="checkbox"/> Ampicillin 1gm IV (preferred) <input type="checkbox"/> or 500mg Orally <input type="checkbox"/> and</p> <p><input type="checkbox"/> Metronidazole 500mg IV (preferred) <input type="checkbox"/> or 400mg Orally <input type="checkbox"/> and</p> <p><input type="checkbox"/> Gentamicin 80mg IM <input type="checkbox"/> or IV <input type="checkbox"/></p> <p><input type="checkbox"/> Any other antibiotics given (specify) _____</p> <p>Reason if not given _____</p> <p><b>If gestational age is between 24 and 34 weeks</b></p> <p><input type="checkbox"/> Give corticosteroids either Betamethasone IM 12mg <input type="checkbox"/> or Dexamethasone IM 6 mg <input type="checkbox"/></p> <p>Reason if not given _____</p> <p>Date _____ Time _____</p> <p><b>Arrange for the following during transportation</b></p> <p><input type="checkbox"/> Keep the woman's legs elevated <input type="checkbox"/> Continue to keep the woman warm</p> <p><input type="checkbox"/> Continue fluid and carry extra bottles to last till she reaches the facility</p> <p><input type="checkbox"/> Give oxygen if foetal distress is present <input type="checkbox"/> Keep a delivery set and essential drugs handy</p> <p><input type="checkbox"/> SN accompanies the woman to monitors fluid intake, urine output and other vitals every 10mins</p> |
| <p>b. <input type="checkbox"/> <b>Placenta praevia</b> (Tick boxes; all must apply)</p> <p><input type="checkbox"/> No abdominal pain (the woman is pain free or if having contractions has no pain between contractions)</p> <p><input type="checkbox"/> Bleeding from the vagina now or prior</p> <p><input type="checkbox"/> Relaxed uterus on palpation / uterus irritable</p>                                          |                                                                                                                                                                                                                                                                                                                                                                                                                                                                                                                                                                                                                                                                                                                                                                                                                                                                                                                                                                                                                                                                                                                                                                                                                                                                                                                                                                                                                                                                                                                                                                                                                                                                                                                                                                                                                                                                                                                                                                                                                                                                                                                                                                                                                                                                                                                                                                                                                                                                                                                                                                                                                                                                                                                                                                                                                                                                                                                                                                                                                                                                                                          |
| <p>c. <input type="checkbox"/> <b>Ruptured uterus</b> (Tick boxes; all must be present)</p> <p><input type="checkbox"/> History of severe abdominal pain that may have suddenly decreased</p> <p><input type="checkbox"/> Bleeding from vagina or into abdomen</p> <p><input type="checkbox"/> Abnormal uterine contour on exam (Bandl's ring)</p> <p><input type="checkbox"/> Easily palpable foetal parts</p>             |                                                                                                                                                                                                                                                                                                                                                                                                                                                                                                                                                                                                                                                                                                                                                                                                                                                                                                                                                                                                                                                                                                                                                                                                                                                                                                                                                                                                                                                                                                                                                                                                                                                                                                                                                                                                                                                                                                                                                                                                                                                                                                                                                                                                                                                                                                                                                                                                                                                                                                                                                                                                                                                                                                                                                                                                                                                                                                                                                                                                                                                                                                          |
| C. CONDITION AT THE TIME OF REFERRAL                                                                                                                                                                                                                                                                                                                                                                                        |                                                                                                                                                                                                                                                                                                                                                                                                                                                                                                                                                                                                                                                                                                                                                                                                                                                                                                                                                                                                                                                                                                                                                                                                                                                                                                                                                                                                                                                                                                                                                                                                                                                                                                                                                                                                                                                                                                                                                                                                                                                                                                                                                                                                                                                                                                                                                                                                                                                                                                                                                                                                                                                                                                                                                                                                                                                                                                                                                                                                                                                                                                          |
| Consciousness Conscious <input type="checkbox"/> Semiconscious <input type="checkbox"/> Unconscious <input type="checkbox"/> Pulse ___/min BP _____mmHg Temperature ___°C                                                                                                                                                                                                                                                   |                                                                                                                                                                                                                                                                                                                                                                                                                                                                                                                                                                                                                                                                                                                                                                                                                                                                                                                                                                                                                                                                                                                                                                                                                                                                                                                                                                                                                                                                                                                                                                                                                                                                                                                                                                                                                                                                                                                                                                                                                                                                                                                                                                                                                                                                                                                                                                                                                                                                                                                                                                                                                                                                                                                                                                                                                                                                                                                                                                                                                                                                                                          |
| Respiration ___/min FHR ___/min Urine output ___cc/hr Other specify _____                                                                                                                                                                                                                                                                                                                                                   |                                                                                                                                                                                                                                                                                                                                                                                                                                                                                                                                                                                                                                                                                                                                                                                                                                                                                                                                                                                                                                                                                                                                                                                                                                                                                                                                                                                                                                                                                                                                                                                                                                                                                                                                                                                                                                                                                                                                                                                                                                                                                                                                                                                                                                                                                                                                                                                                                                                                                                                                                                                                                                                                                                                                                                                                                                                                                                                                                                                                                                                                                                          |
| D.REFERRAL DETAILS                                                                                                                                                                                                                                                                                                                                                                                                          |                                                                                                                                                                                                                                                                                                                                                                                                                                                                                                                                                                                                                                                                                                                                                                                                                                                                                                                                                                                                                                                                                                                                                                                                                                                                                                                                                                                                                                                                                                                                                                                                                                                                                                                                                                                                                                                                                                                                                                                                                                                                                                                                                                                                                                                                                                                                                                                                                                                                                                                                                                                                                                                                                                                                                                                                                                                                                                                                                                                                                                                                                                          |
| Date diagnosis made _____                                                                                                                                                                                                                                                                                                                                                                                                   | Time diagnosis made _____ hrs _____ mins                                                                                                                                                                                                                                                                                                                                                                                                                                                                                                                                                                                                                                                                                                                                                                                                                                                                                                                                                                                                                                                                                                                                                                                                                                                                                                                                                                                                                                                                                                                                                                                                                                                                                                                                                                                                                                                                                                                                                                                                                                                                                                                                                                                                                                                                                                                                                                                                                                                                                                                                                                                                                                                                                                                                                                                                                                                                                                                                                                                                                                                                 |
| Diagnosed by SN <input type="checkbox"/> MO <input type="checkbox"/> Other <input type="checkbox"/> Staff name _____                                                                                                                                                                                                                                                                                                        | Signature _____                                                                                                                                                                                                                                                                                                                                                                                                                                                                                                                                                                                                                                                                                                                                                                                                                                                                                                                                                                                                                                                                                                                                                                                                                                                                                                                                                                                                                                                                                                                                                                                                                                                                                                                                                                                                                                                                                                                                                                                                                                                                                                                                                                                                                                                                                                                                                                                                                                                                                                                                                                                                                                                                                                                                                                                                                                                                                                                                                                                                                                                                                          |
| Details of facility to which the woman is referred                                                                                                                                                                                                                                                                                                                                                                          |                                                                                                                                                                                                                                                                                                                                                                                                                                                                                                                                                                                                                                                                                                                                                                                                                                                                                                                                                                                                                                                                                                                                                                                                                                                                                                                                                                                                                                                                                                                                                                                                                                                                                                                                                                                                                                                                                                                                                                                                                                                                                                                                                                                                                                                                                                                                                                                                                                                                                                                                                                                                                                                                                                                                                                                                                                                                                                                                                                                                                                                                                                          |
| Name _____                                                                                                                                                                                                                                                                                                                                                                                                                  | Location _____ District _____ Taluka _____                                                                                                                                                                                                                                                                                                                                                                                                                                                                                                                                                                                                                                                                                                                                                                                                                                                                                                                                                                                                                                                                                                                                                                                                                                                                                                                                                                                                                                                                                                                                                                                                                                                                                                                                                                                                                                                                                                                                                                                                                                                                                                                                                                                                                                                                                                                                                                                                                                                                                                                                                                                                                                                                                                                                                                                                                                                                                                                                                                                                                                                               |
| Type CHC <input type="checkbox"/> TH <input type="checkbox"/> DH <input type="checkbox"/> Private <input type="checkbox"/> Other <input type="checkbox"/> (specify) _____                                                                                                                                                                                                                                                   |                                                                                                                                                                                                                                                                                                                                                                                                                                                                                                                                                                                                                                                                                                                                                                                                                                                                                                                                                                                                                                                                                                                                                                                                                                                                                                                                                                                                                                                                                                                                                                                                                                                                                                                                                                                                                                                                                                                                                                                                                                                                                                                                                                                                                                                                                                                                                                                                                                                                                                                                                                                                                                                                                                                                                                                                                                                                                                                                                                                                                                                                                                          |
| Person to contact _____                                                                                                                                                                                                                                                                                                                                                                                                     | Telephone # _____                                                                                                                                                                                                                                                                                                                                                                                                                                                                                                                                                                                                                                                                                                                                                                                                                                                                                                                                                                                                                                                                                                                                                                                                                                                                                                                                                                                                                                                                                                                                                                                                                                                                                                                                                                                                                                                                                                                                                                                                                                                                                                                                                                                                                                                                                                                                                                                                                                                                                                                                                                                                                                                                                                                                                                                                                                                                                                                                                                                                                                                                                        |
| Date left PHC _____                                                                                                                                                                                                                                                                                                                                                                                                         | Time left PHC _____ hrs _____ mins                                                                                                                                                                                                                                                                                                                                                                                                                                                                                                                                                                                                                                                                                                                                                                                                                                                                                                                                                                                                                                                                                                                                                                                                                                                                                                                                                                                                                                                                                                                                                                                                                                                                                                                                                                                                                                                                                                                                                                                                                                                                                                                                                                                                                                                                                                                                                                                                                                                                                                                                                                                                                                                                                                                                                                                                                                                                                                                                                                                                                                                                       |
| Type of vehicle used for transportation 108 <input type="checkbox"/> Ambulance Govt <input type="checkbox"/> Ambulance Pvt <input type="checkbox"/> Other specify <input type="checkbox"/> _____                                                                                                                                                                                                                            |                                                                                                                                                                                                                                                                                                                                                                                                                                                                                                                                                                                                                                                                                                                                                                                                                                                                                                                                                                                                                                                                                                                                                                                                                                                                                                                                                                                                                                                                                                                                                                                                                                                                                                                                                                                                                                                                                                                                                                                                                                                                                                                                                                                                                                                                                                                                                                                                                                                                                                                                                                                                                                                                                                                                                                                                                                                                                                                                                                                                                                                                                                          |
| Outcome of referral Discharged healthy <input type="checkbox"/> Died <input type="checkbox"/>                                                                                                                                                                                                                                                                                                                               | Date _____ Time _____ hrs _____ mins                                                                                                                                                                                                                                                                                                                                                                                                                                                                                                                                                                                                                                                                                                                                                                                                                                                                                                                                                                                                                                                                                                                                                                                                                                                                                                                                                                                                                                                                                                                                                                                                                                                                                                                                                                                                                                                                                                                                                                                                                                                                                                                                                                                                                                                                                                                                                                                                                                                                                                                                                                                                                                                                                                                                                                                                                                                                                                                                                                                                                                                                     |



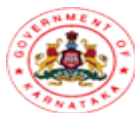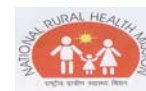

## COMPLICATION CASE SHEET D

For initial management and referral for women with infection/sepsis (pregnant or postpartum)

Send a copy of the case sheet along with this sheet to the referral facility

| A.BACKGROUND INFORMATION                                                                                                                                                                                                                                                                                                                                                                                          |                                                                                                                                                                                                                                                                                                                                                                                                                                                                                                                                                                                                                                                                                                                                                                                                                                                                                                                                                                                                                                                                                                               |  |  |  |  |  |  |  |  |
|-------------------------------------------------------------------------------------------------------------------------------------------------------------------------------------------------------------------------------------------------------------------------------------------------------------------------------------------------------------------------------------------------------------------|---------------------------------------------------------------------------------------------------------------------------------------------------------------------------------------------------------------------------------------------------------------------------------------------------------------------------------------------------------------------------------------------------------------------------------------------------------------------------------------------------------------------------------------------------------------------------------------------------------------------------------------------------------------------------------------------------------------------------------------------------------------------------------------------------------------------------------------------------------------------------------------------------------------------------------------------------------------------------------------------------------------------------------------------------------------------------------------------------------------|--|--|--|--|--|--|--|--|
| District _____ Taluka _____ PHC Location _____                                                                                                                                                                                                                                                                                                                                                                    |                                                                                                                                                                                                                                                                                                                                                                                                                                                                                                                                                                                                                                                                                                                                                                                                                                                                                                                                                                                                                                                                                                               |  |  |  |  |  |  |  |  |
| Name _____ Thaiyi card number <table border="1" style="display: inline-table; vertical-align: middle;"><tr><td> </td><td> </td><td> </td><td> </td><td> </td><td> </td><td> </td><td> </td></tr></table>                                                                                                                                                                                                          |                                                                                                                                                                                                                                                                                                                                                                                                                                                                                                                                                                                                                                                                                                                                                                                                                                                                                                                                                                                                                                                                                                               |  |  |  |  |  |  |  |  |
|                                                                                                                                                                                                                                                                                                                                                                                                                   |                                                                                                                                                                                                                                                                                                                                                                                                                                                                                                                                                                                                                                                                                                                                                                                                                                                                                                                                                                                                                                                                                                               |  |  |  |  |  |  |  |  |
| Address _____                                                                                                                                                                                                                                                                                                                                                                                                     |                                                                                                                                                                                                                                                                                                                                                                                                                                                                                                                                                                                                                                                                                                                                                                                                                                                                                                                                                                                                                                                                                                               |  |  |  |  |  |  |  |  |
| B.SPECIFIC DIAGNOSIS AND INITIAL MANAGEMENT                                                                                                                                                                                                                                                                                                                                                                       |                                                                                                                                                                                                                                                                                                                                                                                                                                                                                                                                                                                                                                                                                                                                                                                                                                                                                                                                                                                                                                                                                                               |  |  |  |  |  |  |  |  |
| Record vital signs Pulse ___/min BP _____mmHg Respiration ___breaths/min Temperature ____°C                                                                                                                                                                                                                                                                                                                       |                                                                                                                                                                                                                                                                                                                                                                                                                                                                                                                                                                                                                                                                                                                                                                                                                                                                                                                                                                                                                                                                                                               |  |  |  |  |  |  |  |  |
| If the woman is in septic shock (systolic BP <90 mmHg, and/or pulse >110/minute) give the following                                                                                                                                                                                                                                                                                                               |                                                                                                                                                                                                                                                                                                                                                                                                                                                                                                                                                                                                                                                                                                                                                                                                                                                                                                                                                                                                                                                                                                               |  |  |  |  |  |  |  |  |
| <input type="checkbox"/> Insert 16-18 gauge IV and give IV Normal Saline or Ringer's Lactate or 5% Dextrose Normal Saline at 60 drops per min for the first 1 litre (2 bottles) <input type="checkbox"/> Next 500ml (1 bottle) at 30 drops per min <input type="checkbox"/> Repeat if necessary                                                                                                                   |                                                                                                                                                                                                                                                                                                                                                                                                                                                                                                                                                                                                                                                                                                                                                                                                                                                                                                                                                                                                                                                                                                               |  |  |  |  |  |  |  |  |
| <input type="checkbox"/> If the systolic BP increases to $\geq 100$ mmHg and pulse slows down to <100/min, slow the IV drip to 3 drops per min                                                                                                                                                                                                                                                                    |                                                                                                                                                                                                                                                                                                                                                                                                                                                                                                                                                                                                                                                                                                                                                                                                                                                                                                                                                                                                                                                                                                               |  |  |  |  |  |  |  |  |
| <input type="checkbox"/> Give the following antibiotics Ampicillin 2g IV <input type="checkbox"/> and Metronidazole 400mg Orally <input type="checkbox"/> or 500mg IV <input type="checkbox"/> and Gentamicin 80mg IM <input type="checkbox"/> or IV <input type="checkbox"/>                                                                                                                                     |                                                                                                                                                                                                                                                                                                                                                                                                                                                                                                                                                                                                                                                                                                                                                                                                                                                                                                                                                                                                                                                                                                               |  |  |  |  |  |  |  |  |
| <input type="checkbox"/> Keep the woman warm, keep her feet elevated <input type="checkbox"/> Give oxygen <input type="checkbox"/> Insert Foley's catheter <input type="checkbox"/> Keep the woman NPO                                                                                                                                                                                                            |                                                                                                                                                                                                                                                                                                                                                                                                                                                                                                                                                                                                                                                                                                                                                                                                                                                                                                                                                                                                                                                                                                               |  |  |  |  |  |  |  |  |
| Diagnosis (Tick a, b, c, d, e or f)                                                                                                                                                                                                                                                                                                                                                                               | Initial management at the PHC (Tick when management done. If in septic shock and antibiotics are already administered, do not repeat the antibiotics)                                                                                                                                                                                                                                                                                                                                                                                                                                                                                                                                                                                                                                                                                                                                                                                                                                                                                                                                                         |  |  |  |  |  |  |  |  |
| a. <input type="checkbox"/> Acute pyelonephritis (Tick boxes, all must be present)<br><input type="checkbox"/> Burning sensation while passing urine<br><input type="checkbox"/> Flank pain<br><input type="checkbox"/> Fever (temperature $\geq 38$ °C) and chills                                                                                                                                               | <input type="checkbox"/> Call and determine the nearest facility with intensive care unit (ICU) for admission and treatment<br><input type="checkbox"/> Arrange transport<br>Give the following antibiotics<br><input type="checkbox"/> Ampicillin 2g IV and<br><input type="checkbox"/> Gentamicin 80mg IM <input type="checkbox"/> or IV <input type="checkbox"/><br>Reason if not given _____<br><input type="checkbox"/> IV Normal Saline or Ringer's Lactate or 5% Dextrose Normal Saline at 30 drops per min<br><input type="checkbox"/> Paracetamol 500mg Orally                                                                                                                                                                                                                                                                                                                                                                                                                                                                                                                                       |  |  |  |  |  |  |  |  |
| b. <input type="checkbox"/> Amnionitis in pregnancy (First 3 must be present. Tick the 4 <sup>th</sup> as appropriate)<br><input type="checkbox"/> Fever (temperature $\geq 38$ °C)<br><input type="checkbox"/> Rupture of membranes<br><input type="checkbox"/> Abdominal pain<br><input type="checkbox"/> Foul smelling or purulent discharge per vagina                                                        | <input type="checkbox"/> Call and determine the nearest facility where labour induction, labour augmentation, caesarean section and ICU are available if needed<br><input type="checkbox"/> Arrange transport<br><input type="checkbox"/> If the delivery is imminent, conduct the delivery<br>Give the following antibiotics (If the condition is poor, IV is preferred)<br><input type="checkbox"/> Ampicillin 1gm Orally <input type="checkbox"/> or IV <input type="checkbox"/> and<br><input type="checkbox"/> Metronidazole 400mg Orally <input type="checkbox"/> or 500mg IV <input type="checkbox"/> and<br><input type="checkbox"/> Gentamicin 80mg IM <input type="checkbox"/> or IV <input type="checkbox"/><br>Reason if not given _____<br><input type="checkbox"/> Paracetamol 500mg Orally                                                                                                                                                                                                                                                                                                     |  |  |  |  |  |  |  |  |
| c. <input type="checkbox"/> Endometritis/ Puerperal sepsis in postpartum (First 4 must be present. Tick the 5 <sup>th</sup> as appropriate)<br><input type="checkbox"/> Fever (temperature $\geq 38$ °C)<br><input type="checkbox"/> Abdominal pain<br><input type="checkbox"/> Tender uterus<br><input type="checkbox"/> Foul smelling or purulent lochia<br><input type="checkbox"/> Increased vaginal bleeding | <input type="checkbox"/> Call and determine the nearest facility where dilatation and curettage (D&C) and intensive care unit (ICU) are available<br><input type="checkbox"/> Arrange transport<br><input type="checkbox"/> If the delivery is imminent, conduct the delivery<br>Give the following antibiotics (If the condition is poor, IV is preferred)<br><input type="checkbox"/> Ampicillin 1g Orally <input type="checkbox"/> or IV <input type="checkbox"/> and<br><input type="checkbox"/> Metronidazole 400mg Orally <input type="checkbox"/> or 500mg IV <input type="checkbox"/> and<br><input type="checkbox"/> Gentamicin 80mg IM <input type="checkbox"/> or IV <input type="checkbox"/><br>Reason if not given _____<br><input type="checkbox"/> Paracetamol 500mg Orally<br><input type="checkbox"/> If bleeding heavily, give either Oxytocin 10 IU IM <input type="checkbox"/> or IV <input type="checkbox"/> or Misoprostol 600 mcg Rectally <input type="checkbox"/> or Orally <input type="checkbox"/> or Methergine 0.2 mg IM <input type="checkbox"/> or IV <input type="checkbox"/> |  |  |  |  |  |  |  |  |
| d. <input type="checkbox"/> Mastitis (Both must be present)<br><input type="checkbox"/> Red and tender breast<br><input type="checkbox"/> Fever (temperature $\geq 38$ °C)                                                                                                                                                                                                                                        | <input type="checkbox"/> Give warm compress on the breasts before feeding<br><input type="checkbox"/> Encourage continuous breastfeeding and emptying of breasts<br>Give the following antibiotics, either<br><input type="checkbox"/> Cloxacillin 500 mg Orally four times daily for 10 days or<br><input type="checkbox"/> Erythromycin 250 mg Orally three times daily for 10 days or                                                                                                                                                                                                                                                                                                                                                                                                                                                                                                                                                                                                                                                                                                                      |  |  |  |  |  |  |  |  |



|                                                                                                                                                                                                                                                                                                                                                                                                                                                                                                                                                                                                                                                                                                                                                                                                                                                                                                                                                                                                                                                                                                                                                                                                                                                                                                                                                                                                                                                                                                                                                                |                                                                                                                                                                                                                                                                                                                                                                                                                                                                                                                                                                                                                                                                                                                                                                                                                                                                                                                                                                                                                                                                                                                                                                                                                                               |
|----------------------------------------------------------------------------------------------------------------------------------------------------------------------------------------------------------------------------------------------------------------------------------------------------------------------------------------------------------------------------------------------------------------------------------------------------------------------------------------------------------------------------------------------------------------------------------------------------------------------------------------------------------------------------------------------------------------------------------------------------------------------------------------------------------------------------------------------------------------------------------------------------------------------------------------------------------------------------------------------------------------------------------------------------------------------------------------------------------------------------------------------------------------------------------------------------------------------------------------------------------------------------------------------------------------------------------------------------------------------------------------------------------------------------------------------------------------------------------------------------------------------------------------------------------------|-----------------------------------------------------------------------------------------------------------------------------------------------------------------------------------------------------------------------------------------------------------------------------------------------------------------------------------------------------------------------------------------------------------------------------------------------------------------------------------------------------------------------------------------------------------------------------------------------------------------------------------------------------------------------------------------------------------------------------------------------------------------------------------------------------------------------------------------------------------------------------------------------------------------------------------------------------------------------------------------------------------------------------------------------------------------------------------------------------------------------------------------------------------------------------------------------------------------------------------------------|
|                                                                                                                                                                                                                                                                                                                                                                                                                                                                                                                                                                                                                                                                                                                                                                                                                                                                                                                                                                                                                                                                                                                                                                                                                                                                                                                                                                                                                                                                                                                                                                | <input type="checkbox"/> Ampicillin 500mg Orally three times daily for 10 days<br>Reason if not given _____<br><input type="checkbox"/> <b>Review after 3 days, if no improvement, change the antibiotic</b><br><input type="checkbox"/> <b>If there is improvement, continue for another 7 days.</b><br><input type="checkbox"/> <b>Refer if abscess develops or if there is no improvement despite changing the antibiotic</b>                                                                                                                                                                                                                                                                                                                                                                                                                                                                                                                                                                                                                                                                                                                                                                                                              |
| e. <input type="checkbox"/> <b>Breast abscess</b> (First 3 must be present. Tick the 4 <sup>th</sup> as appropriate)<br><input type="checkbox"/> Tender, discreet fluctuant mass in the breast<br><input type="checkbox"/> Fever (temperature $\geq 38^{\circ}\text{C}$ ) and chills<br><input type="checkbox"/> Pain in the breast<br><input type="checkbox"/> Pus draining                                                                                                                                                                                                                                                                                                                                                                                                                                                                                                                                                                                                                                                                                                                                                                                                                                                                                                                                                                                                                                                                                                                                                                                   | <input type="checkbox"/> <b>Call and determine the nearest facility where breast abscess can be surgically drained, if necessary</b><br><input type="checkbox"/> <b>Arrange transport</b><br><input type="checkbox"/> <b>Apply warm compress, give breast support, encourage mother to breastfeed</b><br><b>Give the following antibiotics, either</b><br><input type="checkbox"/> Cloxacillin 500 mg Orally or<br><input type="checkbox"/> Ampicillin 500mg Orally or<br><input type="checkbox"/> Erythromycin 250mg Orally<br>Reason if not given _____<br><input type="checkbox"/> <b>Paracetamol 500mg Orally</b>                                                                                                                                                                                                                                                                                                                                                                                                                                                                                                                                                                                                                         |
| f. <input type="checkbox"/> <b>Wound infection / abscess</b> (First 2 must be present. Tick the 3 <sup>rd</sup> as appropriate)<br><input type="checkbox"/> Fever (temperature $\geq 38^{\circ}\text{C}$ )<br><input type="checkbox"/> Red, swollen, painful wound<br><input type="checkbox"/> Pus draining                                                                                                                                                                                                                                                                                                                                                                                                                                                                                                                                                                                                                                                                                                                                                                                                                                                                                                                                                                                                                                                                                                                                                                                                                                                    | <b>If the wound infection is mild (no abscess), give the following antibiotics</b><br><input type="checkbox"/> Ampicillin 500mg four times daily Orally and<br><input type="checkbox"/> Metronidazole 400mg three times daily Orally<br><input type="checkbox"/> <b>Have the woman return after one day for reassessment</b><br><input type="checkbox"/> <b>If there is improvement after the 1<sup>st</sup> day, continue for another 4 days</b><br><input type="checkbox"/> <b>Refer if there is no improvement after 1<sup>st</sup> day</b><br><br><b>If there is wound abscess</b><br><input type="checkbox"/> <b>Call and determine the nearest facility where abscess can be surgically drained</b><br><input type="checkbox"/> <b>Arrange transport</b><br><b>Give the following antibiotics</b><br><input type="checkbox"/> Ampicillin 1g Orally <input type="checkbox"/> or IV <input type="checkbox"/> and<br><input type="checkbox"/> Metronidazole 400mg Orally <input type="checkbox"/> or 500mg IV <input type="checkbox"/> and<br><input type="checkbox"/> Gentamicin 80mg IM <input type="checkbox"/> or IV <input type="checkbox"/><br>Reason if not given _____<br><input type="checkbox"/> <b>Paracetamol 500mg Orally</b> |
| Date of management <input type="text"/> <input type="text"/> <input type="text"/> <input type="text"/> <input type="text"/> <input type="text"/> Time of management <input type="text"/> <input type="text"/> hrs <input type="text"/> <input type="text"/> mins                                                                                                                                                                                                                                                                                                                                                                                                                                                                                                                                                                                                                                                                                                                                                                                                                                                                                                                                                                                                                                                                                                                                                                                                                                                                                               |                                                                                                                                                                                                                                                                                                                                                                                                                                                                                                                                                                                                                                                                                                                                                                                                                                                                                                                                                                                                                                                                                                                                                                                                                                               |
| <b>Arrange for the following during transportation</b><br><input type="checkbox"/> In case of shock<br><input type="checkbox"/> Continue fluids and carry extra bottles to last till she reaches the facility<br><input type="checkbox"/> Give oxygen (if required)<br><input type="checkbox"/> SN accompanies the woman and monitors fluid intake and urine output and other vitals every 10 mins<br><input type="checkbox"/> If the woman is pregnant, keep a delivery set and essential drugs handy<br><input type="checkbox"/> If delivered, ensure baby is kept warm, feedings continued                                                                                                                                                                                                                                                                                                                                                                                                                                                                                                                                                                                                                                                                                                                                                                                                                                                                                                                                                                  |                                                                                                                                                                                                                                                                                                                                                                                                                                                                                                                                                                                                                                                                                                                                                                                                                                                                                                                                                                                                                                                                                                                                                                                                                                               |
| <b>C. CONDITION AT THE TIME OF REFERRAL</b>                                                                                                                                                                                                                                                                                                                                                                                                                                                                                                                                                                                                                                                                                                                                                                                                                                                                                                                                                                                                                                                                                                                                                                                                                                                                                                                                                                                                                                                                                                                    |                                                                                                                                                                                                                                                                                                                                                                                                                                                                                                                                                                                                                                                                                                                                                                                                                                                                                                                                                                                                                                                                                                                                                                                                                                               |
| Consciousness: Conscious <input type="checkbox"/> Semiconscious <input type="checkbox"/> Unconscious <input type="checkbox"/> Pulse: _____/min BP: _____mmHg<br>Temperature: _____ $^{\circ}\text{C}$ Respiration: _____/min Other specify _____                                                                                                                                                                                                                                                                                                                                                                                                                                                                                                                                                                                                                                                                                                                                                                                                                                                                                                                                                                                                                                                                                                                                                                                                                                                                                                               |                                                                                                                                                                                                                                                                                                                                                                                                                                                                                                                                                                                                                                                                                                                                                                                                                                                                                                                                                                                                                                                                                                                                                                                                                                               |
| <b>D. REFERRAL DETAILS</b>                                                                                                                                                                                                                                                                                                                                                                                                                                                                                                                                                                                                                                                                                                                                                                                                                                                                                                                                                                                                                                                                                                                                                                                                                                                                                                                                                                                                                                                                                                                                     |                                                                                                                                                                                                                                                                                                                                                                                                                                                                                                                                                                                                                                                                                                                                                                                                                                                                                                                                                                                                                                                                                                                                                                                                                                               |
| Date diagnosis made <input type="text"/> <input type="text"/> <input type="text"/> <input type="text"/> <input type="text"/> <input type="text"/> Time diagnosis made <input type="text"/> <input type="text"/> hrs <input type="text"/> <input type="text"/> mins<br>Diagnosed by SN <input type="checkbox"/> MO <input type="checkbox"/> Other <input type="checkbox"/> Staff name _____ Signature _____<br><b>Details of facility to which the woman is referred</b><br>Name _____ Location _____ District _____ Taluka _____<br>Type CHC <input type="checkbox"/> TH <input type="checkbox"/> DH <input type="checkbox"/> Private <input type="checkbox"/> Other <input type="checkbox"/> (specify) _____<br>Person to contact _____ Telephone # _____<br>Date left PHC <input type="text"/> <input type="text"/> <input type="text"/> <input type="text"/> <input type="text"/> <input type="text"/> Time left PHC <input type="text"/> <input type="text"/> hrs <input type="text"/> <input type="text"/> mins<br>Type of vehicle used for transportation 108 <input type="checkbox"/> Ambulance Govt <input type="checkbox"/> Ambulance Pvt <input type="checkbox"/> Other specify <input type="checkbox"/> _____<br>Outcome of referral Discharged healthy <input type="checkbox"/> Died <input type="checkbox"/> Date <input type="text"/> <input type="text"/> <input type="text"/> <input type="text"/> <input type="text"/> <input type="text"/> Time <input type="text"/> <input type="text"/> hrs <input type="text"/> <input type="text"/> mins |                                                                                                                                                                                                                                                                                                                                                                                                                                                                                                                                                                                                                                                                                                                                                                                                                                                                                                                                                                                                                                                                                                                                                                                                                                               |

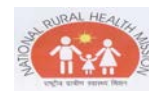

## COMPLICATION CASE SHEET E

For initial management and referral for women with preterm labour with or without rupture of membranes / premature rupture of membranes with or without preterm labour. Send a copy of the case sheet along with this sheet to the referral facility

| A.BACKGROUND INFORMATION                                                                                                                                                                                                                                                                                                                                                                                                            |                                                                                                                                                                                                                                                                                                                                                                                                                                                                                                                                                                                                                                                                                                                                                                                                                                         |  |  |  |  |  |  |  |  |  |  |
|-------------------------------------------------------------------------------------------------------------------------------------------------------------------------------------------------------------------------------------------------------------------------------------------------------------------------------------------------------------------------------------------------------------------------------------|-----------------------------------------------------------------------------------------------------------------------------------------------------------------------------------------------------------------------------------------------------------------------------------------------------------------------------------------------------------------------------------------------------------------------------------------------------------------------------------------------------------------------------------------------------------------------------------------------------------------------------------------------------------------------------------------------------------------------------------------------------------------------------------------------------------------------------------------|--|--|--|--|--|--|--|--|--|--|
| District _____ Taluka _____ PHC Location _____                                                                                                                                                                                                                                                                                                                                                                                      |                                                                                                                                                                                                                                                                                                                                                                                                                                                                                                                                                                                                                                                                                                                                                                                                                                         |  |  |  |  |  |  |  |  |  |  |
| Name _____ Thaiyi card number <table border="1" style="display: inline-table; vertical-align: middle;"><tr><td> </td><td> </td><td> </td><td> </td><td> </td><td> </td><td> </td><td> </td></tr></table>                                                                                                                                                                                                                            |                                                                                                                                                                                                                                                                                                                                                                                                                                                                                                                                                                                                                                                                                                                                                                                                                                         |  |  |  |  |  |  |  |  |  |  |
|                                                                                                                                                                                                                                                                                                                                                                                                                                     |                                                                                                                                                                                                                                                                                                                                                                                                                                                                                                                                                                                                                                                                                                                                                                                                                                         |  |  |  |  |  |  |  |  |  |  |
| Address _____                                                                                                                                                                                                                                                                                                                                                                                                                       |                                                                                                                                                                                                                                                                                                                                                                                                                                                                                                                                                                                                                                                                                                                                                                                                                                         |  |  |  |  |  |  |  |  |  |  |
| B.SPECIFIC DIAGNOSIS AND INITIAL MANAGEMENT                                                                                                                                                                                                                                                                                                                                                                                         |                                                                                                                                                                                                                                                                                                                                                                                                                                                                                                                                                                                                                                                                                                                                                                                                                                         |  |  |  |  |  |  |  |  |  |  |
| Diagnosis (Tick a, b, c or d)                                                                                                                                                                                                                                                                                                                                                                                                       | Initial management at the PHC (Tick when management done)                                                                                                                                                                                                                                                                                                                                                                                                                                                                                                                                                                                                                                                                                                                                                                               |  |  |  |  |  |  |  |  |  |  |
| <b>a. <input type="checkbox"/> Preterm labour with or without rupture of membranes and with fever</b> (The first three must apply. Tick fourth as appropriate)<br><input type="checkbox"/> Gestational age between 24 and 37 weeks<br><input type="checkbox"/> Active labour<br><input type="checkbox"/> Temp $\geq 38$ C<br><input type="checkbox"/> Rupture of membranes                                                          | <input type="checkbox"/> Call and determine the facility for preterm delivery and special newborn care<br><input type="checkbox"/> Arrange transport<br><b>Give the following antibiotics</b><br><input type="checkbox"/> Ampicillin 1g Orally <input type="checkbox"/> or IV <input type="checkbox"/> and<br><input type="checkbox"/> Metronidazole 400mg Orally <input type="checkbox"/> or 500mg IV <input type="checkbox"/> and<br><input type="checkbox"/> Gentamicin 80mg IM <input type="checkbox"/> or IV <input type="checkbox"/><br>Reason if not given _____<br><b>If gestational age is between 24 and 34 weeks</b><br><input type="checkbox"/> Give corticosteroids either Betamethasone IM 12mg <input type="checkbox"/> or Dexamethasone IM 6 mg <input type="checkbox"/><br>Reason if not given _____                   |  |  |  |  |  |  |  |  |  |  |
| <b>b. <input type="checkbox"/> Preterm labour with or without rupture of membranes and no fever</b> (The first three must apply. Tick fourth as appropriate)<br><input type="checkbox"/> Gestational age between 24 and 37 weeks<br><input type="checkbox"/> Active labour<br><input type="checkbox"/> No fever<br><input type="checkbox"/> Rupture of membranes                                                                    | <input type="checkbox"/> Call and determine the facility for preterm delivery and special newborn care<br><input type="checkbox"/> Arrange transport<br><b>Give the following antibiotic</b><br><input type="checkbox"/> Ampicillin 1g Orally <input type="checkbox"/> or IV <input type="checkbox"/><br>Reason if not given _____<br><b>If gestational age is between 24 and 34 weeks</b><br><input type="checkbox"/> Give corticosteroids either Betamethasone IM 12mg <input type="checkbox"/> or Dexamethasone IM 6 mg <input type="checkbox"/><br>Reason if not given _____                                                                                                                                                                                                                                                        |  |  |  |  |  |  |  |  |  |  |
| <b>c. <input type="checkbox"/> Preterm rupture of membranes without labour and without fever</b> (Tick boxes; all must apply)<br><input type="checkbox"/> Gestational age between 24 and 37 weeks<br><input type="checkbox"/> Rupture of membranes<br><input type="checkbox"/> Not in active labour<br><input type="checkbox"/> No fever                                                                                            | <input type="checkbox"/> Call and determine the facility for labour induction, preterm delivery and special newborn care<br><input type="checkbox"/> Arrange transport<br><b>Give the following antibiotics</b><br><input type="checkbox"/> Erythromycin 250 mg Orally and<br><input type="checkbox"/> Amoxicillin 500 mg Orally<br>Reason if not given _____<br><b>If gestational age is between 24 and 34 weeks</b><br><input type="checkbox"/> Give corticosteroids either Betamethasone IM 12mg <input type="checkbox"/> or Dexamethasone IM 6 mg <input type="checkbox"/><br>Reason if not given _____                                                                                                                                                                                                                             |  |  |  |  |  |  |  |  |  |  |
| <b>d. <input type="checkbox"/> Preterm rupture of membranes without labour and with fever</b> (Tick boxes; all must apply)<br><input type="checkbox"/> Gestational age between 24 and 37 weeks<br><input type="checkbox"/> Rupture of membranes<br><input type="checkbox"/> Not in active labour<br><input type="checkbox"/> Temp $\geq 38$ C                                                                                       | <input type="checkbox"/> Call and determine the facility for labour induction, preterm delivery and special newborn care<br><input type="checkbox"/> Arrange transport<br><b>Give the following antibiotics</b><br><input type="checkbox"/> Ampicillin 1g Orally <input type="checkbox"/> or IV <input type="checkbox"/> and<br><input type="checkbox"/> Metronidazole 400mg Orally <input type="checkbox"/> or 500mg IV <input type="checkbox"/> and<br><input type="checkbox"/> Gentamicin 80mg IM <input type="checkbox"/> or IV <input type="checkbox"/><br>Reason if not given _____<br><b>If gestational age is between 24 and 34 weeks</b><br><input type="checkbox"/> Give corticosteroids either Betamethasone IM 12mg <input type="checkbox"/> or Dexamethasone IM 6 mg <input type="checkbox"/><br>Reason if not given _____ |  |  |  |  |  |  |  |  |  |  |
| Date of management <table border="1" style="display: inline-table; vertical-align: middle;"><tr><td> </td><td> </td><td> </td><td> </td><td> </td><td> </td></tr></table> Time of management <table border="1" style="display: inline-table; vertical-align: middle;"><tr><td> </td><td> </td></tr></table> hrs <table border="1" style="display: inline-table; vertical-align: middle;"><tr><td> </td><td> </td></tr></table> mins |                                                                                                                                                                                                                                                                                                                                                                                                                                                                                                                                                                                                                                                                                                                                                                                                                                         |  |  |  |  |  |  |  |  |  |  |
|                                                                                                                                                                                                                                                                                                                                                                                                                                     |                                                                                                                                                                                                                                                                                                                                                                                                                                                                                                                                                                                                                                                                                                                                                                                                                                         |  |  |  |  |  |  |  |  |  |  |
|                                                                                                                                                                                                                                                                                                                                                                                                                                     |                                                                                                                                                                                                                                                                                                                                                                                                                                                                                                                                                                                                                                                                                                                                                                                                                                         |  |  |  |  |  |  |  |  |  |  |
|                                                                                                                                                                                                                                                                                                                                                                                                                                     |                                                                                                                                                                                                                                                                                                                                                                                                                                                                                                                                                                                                                                                                                                                                                                                                                                         |  |  |  |  |  |  |  |  |  |  |
| <b>Arrange for the following during transportation</b><br><input type="checkbox"/> Give oxygen<br><input type="checkbox"/> Keep the woman in left lateral position                                                                                                                                                                                                                                                                  |                                                                                                                                                                                                                                                                                                                                                                                                                                                                                                                                                                                                                                                                                                                                                                                                                                         |  |  |  |  |  |  |  |  |  |  |

| C. CONDITION AT THE TIME OF REFERRAL                                                                                                                                                                                            |                                                                                                                                                                                                              |
|---------------------------------------------------------------------------------------------------------------------------------------------------------------------------------------------------------------------------------|--------------------------------------------------------------------------------------------------------------------------------------------------------------------------------------------------------------|
| Consciousness: Conscious <input type="checkbox"/> Semiconscious <input type="checkbox"/> Unconscious <input type="checkbox"/> Pulse: _____/min BP: _____mmHg<br>Temperature: _____°C Respiration: _____/min Other specify _____ |                                                                                                                                                                                                              |
| D. REFERRAL DETAILS                                                                                                                                                                                                             |                                                                                                                                                                                                              |
| Date diagnosis made                                                                                                                                                                                                             | <input type="text"/> <input type="text"/> <input type="text"/> <input type="text"/> <input type="text"/> <input type="text"/>                                                                                |
| Time diagnosis made                                                                                                                                                                                                             | <input type="text"/> <input type="text"/> hrs <input type="text"/> <input type="text"/> mins                                                                                                                 |
| Diagnosed by SN <input type="checkbox"/> MO <input type="checkbox"/> Other <input type="checkbox"/> Staff name                                                                                                                  | _____ Signature _____                                                                                                                                                                                        |
| Details of facility to which the woman is referred<br>Name _____ Location _____ District _____ Taluka _____                                                                                                                     |                                                                                                                                                                                                              |
| Type CHC <input type="checkbox"/> TH <input type="checkbox"/> DH <input type="checkbox"/> Private <input type="checkbox"/> Other <input type="checkbox"/> (specify) _____                                                       |                                                                                                                                                                                                              |
| Person to contact                                                                                                                                                                                                               | Telephone # _____                                                                                                                                                                                            |
| Date left PHC                                                                                                                                                                                                                   | <input type="text"/> <input type="text"/> <input type="text"/> <input type="text"/> <input type="text"/> <input type="text"/>                                                                                |
| Time left PHC                                                                                                                                                                                                                   | <input type="text"/> <input type="text"/> hrs <input type="text"/> <input type="text"/> mins                                                                                                                 |
| Type of vehicle used for transportation 108 <input type="checkbox"/> Ambulance Govt <input type="checkbox"/> Ambulance Pvt <input type="checkbox"/> Other specify <input type="checkbox"/> _____                                |                                                                                                                                                                                                              |
| Outcome of referral                                                                                                                                                                                                             | Discharged healthy <input type="checkbox"/> Died <input type="checkbox"/> Date <input type="text"/> <input type="text"/> <input type="text"/> <input type="text"/> <input type="text"/> <input type="text"/> |
|                                                                                                                                                                                                                                 | Time <input type="text"/> <input type="text"/> hrs <input type="text"/> <input type="text"/> mins                                                                                                            |

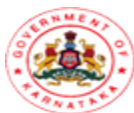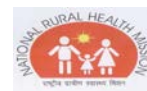

## COMPLICATION CASE SHEET F

For initial management and referral for women with postpartum haemorrhage

Send a copy of the case sheet along with this sheet to the referral facility

| A.BACKGROUND INFORMATION                                                                                                                                                                                                                                                                                                                                                                                                                                                                                                                                                                                                                                                                                                                                                                                                                                                                                                                                                                                                                                                                                                                                   |                                                                                                                                                                                                                                                                                                                                                                                                                                                                                                                                                                                                                                                                                                                                                                                                                                                                                                                                                                                                                                                                                                                                                                                                                                                                                                                                   |  |  |  |  |  |  |  |  |
|------------------------------------------------------------------------------------------------------------------------------------------------------------------------------------------------------------------------------------------------------------------------------------------------------------------------------------------------------------------------------------------------------------------------------------------------------------------------------------------------------------------------------------------------------------------------------------------------------------------------------------------------------------------------------------------------------------------------------------------------------------------------------------------------------------------------------------------------------------------------------------------------------------------------------------------------------------------------------------------------------------------------------------------------------------------------------------------------------------------------------------------------------------|-----------------------------------------------------------------------------------------------------------------------------------------------------------------------------------------------------------------------------------------------------------------------------------------------------------------------------------------------------------------------------------------------------------------------------------------------------------------------------------------------------------------------------------------------------------------------------------------------------------------------------------------------------------------------------------------------------------------------------------------------------------------------------------------------------------------------------------------------------------------------------------------------------------------------------------------------------------------------------------------------------------------------------------------------------------------------------------------------------------------------------------------------------------------------------------------------------------------------------------------------------------------------------------------------------------------------------------|--|--|--|--|--|--|--|--|
| District _____ Taluka _____ PHC Location _____                                                                                                                                                                                                                                                                                                                                                                                                                                                                                                                                                                                                                                                                                                                                                                                                                                                                                                                                                                                                                                                                                                             |                                                                                                                                                                                                                                                                                                                                                                                                                                                                                                                                                                                                                                                                                                                                                                                                                                                                                                                                                                                                                                                                                                                                                                                                                                                                                                                                   |  |  |  |  |  |  |  |  |
| Name _____ Thaiyi card number <table border="1" style="display: inline-table; vertical-align: middle;"><tr><td> </td><td> </td><td> </td><td> </td><td> </td><td> </td><td> </td><td> </td></tr></table>                                                                                                                                                                                                                                                                                                                                                                                                                                                                                                                                                                                                                                                                                                                                                                                                                                                                                                                                                   |                                                                                                                                                                                                                                                                                                                                                                                                                                                                                                                                                                                                                                                                                                                                                                                                                                                                                                                                                                                                                                                                                                                                                                                                                                                                                                                                   |  |  |  |  |  |  |  |  |
|                                                                                                                                                                                                                                                                                                                                                                                                                                                                                                                                                                                                                                                                                                                                                                                                                                                                                                                                                                                                                                                                                                                                                            |                                                                                                                                                                                                                                                                                                                                                                                                                                                                                                                                                                                                                                                                                                                                                                                                                                                                                                                                                                                                                                                                                                                                                                                                                                                                                                                                   |  |  |  |  |  |  |  |  |
| Address _____                                                                                                                                                                                                                                                                                                                                                                                                                                                                                                                                                                                                                                                                                                                                                                                                                                                                                                                                                                                                                                                                                                                                              |                                                                                                                                                                                                                                                                                                                                                                                                                                                                                                                                                                                                                                                                                                                                                                                                                                                                                                                                                                                                                                                                                                                                                                                                                                                                                                                                   |  |  |  |  |  |  |  |  |
| B.SPECIFIC DIAGNOSIS AND INITIAL MANAGEMENT                                                                                                                                                                                                                                                                                                                                                                                                                                                                                                                                                                                                                                                                                                                                                                                                                                                                                                                                                                                                                                                                                                                |                                                                                                                                                                                                                                                                                                                                                                                                                                                                                                                                                                                                                                                                                                                                                                                                                                                                                                                                                                                                                                                                                                                                                                                                                                                                                                                                   |  |  |  |  |  |  |  |  |
| <input type="checkbox"/> Shout for help. Mobilize all available health personnel<br>Record vital signs Pulse ___/min BP _____mmHg Respiration ___breaths/min Temperature ____°C<br><input type="checkbox"/> Insert 16-18 gauge IV and give Normal Saline or Ringer's Lactate or 5 % Dextrose Normal Saline at 30 drops per min<br><input type="checkbox"/> Insert Foley's catheter<br><b>If the woman is in shock</b> (systolic BP <90 mmHg, and/or pulse >110/minute) or she is bleeding heavily (soaking one pad in less than 5 minutes) give the following<br><input type="checkbox"/> Give IV Normal Saline or Ringer's Lactate or 5 % Dextrose Normal Saline at 60 drops per min for the first 1 litre (2 bottles)<br><input type="checkbox"/> Next 500ml (1 bottle) at 30 drops per min <input type="checkbox"/> Repeat if necessary<br><input type="checkbox"/> <b>If the systolic BP increases to ≥100 mmHg and pulse slows down to &lt;100/min</b> , slow the IV drip to 3 drops per min<br><input type="checkbox"/> Keep the woman warm, keep her feet elevated <input type="checkbox"/> Give oxygen <input type="checkbox"/> Keep the woman NPO |                                                                                                                                                                                                                                                                                                                                                                                                                                                                                                                                                                                                                                                                                                                                                                                                                                                                                                                                                                                                                                                                                                                                                                                                                                                                                                                                   |  |  |  |  |  |  |  |  |
| Diagnosis (Tick a, b, c, or d)                                                                                                                                                                                                                                                                                                                                                                                                                                                                                                                                                                                                                                                                                                                                                                                                                                                                                                                                                                                                                                                                                                                             | Initial management at the PHC (Tick when management done)                                                                                                                                                                                                                                                                                                                                                                                                                                                                                                                                                                                                                                                                                                                                                                                                                                                                                                                                                                                                                                                                                                                                                                                                                                                                         |  |  |  |  |  |  |  |  |
| a. <input type="checkbox"/> Retained placenta/ fragments within first 24 hours postpartum (Tick boxes; both must be present)<br><input type="checkbox"/> Increased bleeding<br><input type="checkbox"/> Placenta not delivered either completely or partially                                                                                                                                                                                                                                                                                                                                                                                                                                                                                                                                                                                                                                                                                                                                                                                                                                                                                              | <input type="checkbox"/> Give Oxytocin 20 IU in IV infusion in 500 ml of Ringer's Lactate or Dextrose Normal Saline at 60 drops per minute<br>Give the following antibiotics (prophylaxis prior to performing manual removal)<br><input type="checkbox"/> Ampicillin 1g IV <input type="checkbox"/> or Orally <input type="checkbox"/> and<br><input type="checkbox"/> Metronidazole 500mg IV <input type="checkbox"/> or 400 mg Orally <input type="checkbox"/> and<br><input type="checkbox"/> Gentamicin 80mg IV <input type="checkbox"/> or IM <input type="checkbox"/><br>Reason if not given _____<br><br><input type="checkbox"/> Perform manual removal of placenta or fragments<br>Reason if not done _____<br><b>If unable to perform manual removal</b><br><input type="checkbox"/> Call and determine the nearest facility where blood and surgical intervention is available, if necessary<br><input type="checkbox"/> Arrange transport<br><input type="checkbox"/> Continue Oxytocin 20 IU in 500ml of Ringer's Lactate or Normal Saline or 5 % Dextrose Normal Saline at 30 drops per min<br><input type="checkbox"/> Perform bimanual compression of the uterus if bleeding is heavy during transport                                                                                                            |  |  |  |  |  |  |  |  |
| b. <input type="checkbox"/> Atonic uterus (Tick boxes; all must be present)<br><input type="checkbox"/> Increased bleeding<br><input type="checkbox"/> Placenta expelled<br><input type="checkbox"/> Soft and flabby uterus                                                                                                                                                                                                                                                                                                                                                                                                                                                                                                                                                                                                                                                                                                                                                                                                                                                                                                                                | <input type="checkbox"/> Massage the uterus to expel any clots<br><input type="checkbox"/> If not given earlier, give Oxytocin 10 IU IM<br><input type="checkbox"/> Give Oxytocin 20 IU in IV infusion in 500 ml of Ringer's Lactate or Normal Saline or 5% Dextrose Normal Saline at 60 drops per minute<br><input type="checkbox"/> Follow up with Oxytocin 10 IU in IV infusion in 500 ml of Ringer's Lactate or Normal Saline or 5% Dextrose Normal Saline at 40 drops per minute<br>Reason if not given _____<br><br><b>If bleeding continues, give one of the following additional uterotonic, either</b><br><input type="checkbox"/> Methergine/ Ergotamine 0.2 mg IM per dose <input type="checkbox"/> can be repeated every 15 minutes for a total of 5 doses. <b>Do NOT give if high blood pressure is present.</b> Repeat doses given <input type="checkbox"/> Number of doses: _____ or<br><input type="checkbox"/> Prostaglandin/ Carboprost 0.25 mg IM per dose <input type="checkbox"/> can be repeated every 15 minutes for a total of 8 doses. <b>Do NOT give if patient has asthma.</b> Repeat doses given <input type="checkbox"/> Number of doses: _____ or<br><input type="checkbox"/> Misoprostol 600 mcg Orally <input type="checkbox"/> or Rectally <input type="checkbox"/><br>Reason if not given _____ |  |  |  |  |  |  |  |  |

|                                                                                                                                                                                                                                                                                                                                                                                                                                                                                                                                                                                                                                   |                                                                                                                                                                                                                                                                                                                                                                                                                                                                                                                                                                                                                                                                                                                                                                                                                                                |
|-----------------------------------------------------------------------------------------------------------------------------------------------------------------------------------------------------------------------------------------------------------------------------------------------------------------------------------------------------------------------------------------------------------------------------------------------------------------------------------------------------------------------------------------------------------------------------------------------------------------------------------|------------------------------------------------------------------------------------------------------------------------------------------------------------------------------------------------------------------------------------------------------------------------------------------------------------------------------------------------------------------------------------------------------------------------------------------------------------------------------------------------------------------------------------------------------------------------------------------------------------------------------------------------------------------------------------------------------------------------------------------------------------------------------------------------------------------------------------------------|
|                                                                                                                                                                                                                                                                                                                                                                                                                                                                                                                                                                                                                                   | <p><b>If bleeding continues and uterus is flabby</b></p> <input type="checkbox"/> Perform bimanual compression of uterus<br><input type="checkbox"/> Call and determine the nearest facility where blood and surgical intervention is available, if necessary<br><input type="checkbox"/> Arrange transport<br><input type="checkbox"/> Continue Oxytocin 20 IU in 500ml of Ringer's Lactate or Dextrose Normal Saline at 30 drops per min                                                                                                                                                                                                                                                                                                                                                                                                     |
| <p>c. <input type="checkbox"/> Perineal/cervical tears (Tick boxes; all must be present)</p> <input type="checkbox"/> Increased bleeding<br><input type="checkbox"/> Placenta expelled<br><input type="checkbox"/> Uterus well contracted                                                                                                                                                                                                                                                                                                                                                                                         | <input type="checkbox"/> Suture, if easily accessible (first and second degree tears)<br><br><p><b>If not easily accessible or identified (or third and fourth degree tears)</b></p> <input type="checkbox"/> Pack the vagina with sterile dressing<br><p><b>Give the following prophylactic antibiotic in case of fourth degree tear</b></p> <input type="checkbox"/> Ampicillin 500 mg Orally<br><input type="checkbox"/> Metronidazole 400 mg Orally<br>Reason if not given _____<br><input type="checkbox"/> Call and determine the facility for surgical intervention, if necessary<br><input type="checkbox"/> Arrange transport                                                                                                                                                                                                         |
| <p>d. <input type="checkbox"/> Delayed PPH due to retained placental fragments (Tick the box)</p> <input type="checkbox"/> Bleeding 24 hours after delivery not due to any other cause                                                                                                                                                                                                                                                                                                                                                                                                                                            | <input type="checkbox"/> Call and determine the nearest facility for dilatation and curettage (D&C), if necessary<br><input type="checkbox"/> Arrange transport<br><input type="checkbox"/> Give either Oxytocin 10 IU IM <input type="checkbox"/> or IV <input type="checkbox"/> or Misoprostol 600 mcg Rectally <input type="checkbox"/> or Orally <input type="checkbox"/><br><p><b>If there is foul smelling discharge, give the following antibiotics</b></p> <input type="checkbox"/> Ampicillin 1 gm Orally <input type="checkbox"/> or IV <input type="checkbox"/> and<br><input type="checkbox"/> Metronidazole 400 mg Orally <input type="checkbox"/> or 500 mg IV <input type="checkbox"/> and<br><input type="checkbox"/> Gentamicin 80 mg IM <input type="checkbox"/> or IV <input type="checkbox"/><br>Reason if not given _____ |
| Date of management <input type="text"/> <input type="text"/> <input type="text"/> <input type="text"/> <input type="text"/> <input type="text"/> Time of management <input type="text"/> <input type="text"/> hrs <input type="text"/> <input type="text"/> mins                                                                                                                                                                                                                                                                                                                                                                  |                                                                                                                                                                                                                                                                                                                                                                                                                                                                                                                                                                                                                                                                                                                                                                                                                                                |
| <p><b>Arrange for the following during transportation</b></p> <input type="checkbox"/> In case of shock<br><input type="checkbox"/> Continue fluids and carry extra bottles to last till she reaches the facility<br><input type="checkbox"/> Give oxygen (if required)<br><input type="checkbox"/> Keep the woman warm and raise her legs<br><input type="checkbox"/> SN accompanies the woman and monitors fluid intake, urine output and other vital signs every 10 mins<br><input type="checkbox"/> Call and arrange for blood / donor, if necessary<br><input type="checkbox"/> Ensure baby is kept warm, feedings continued |                                                                                                                                                                                                                                                                                                                                                                                                                                                                                                                                                                                                                                                                                                                                                                                                                                                |
| <b>C. CONDITION AT THE TIME OF REFERRAL</b>                                                                                                                                                                                                                                                                                                                                                                                                                                                                                                                                                                                       |                                                                                                                                                                                                                                                                                                                                                                                                                                                                                                                                                                                                                                                                                                                                                                                                                                                |
| Consciousness: Conscious <input type="checkbox"/> Semiconscious <input type="checkbox"/> Unconscious <input type="checkbox"/> Pulse: _____/min BP: _____mmHg<br>Temperature: _____°C Respiration: _____/min Urine output: _____cc/hr Other specify _____                                                                                                                                                                                                                                                                                                                                                                          |                                                                                                                                                                                                                                                                                                                                                                                                                                                                                                                                                                                                                                                                                                                                                                                                                                                |
| <b>D. REFERRAL DETAILS</b>                                                                                                                                                                                                                                                                                                                                                                                                                                                                                                                                                                                                        |                                                                                                                                                                                                                                                                                                                                                                                                                                                                                                                                                                                                                                                                                                                                                                                                                                                |
| Date diagnosis made <input type="text"/> <input type="text"/> <input type="text"/> <input type="text"/> <input type="text"/> <input type="text"/> Time diagnosis made <input type="text"/> <input type="text"/> hrs <input type="text"/> <input type="text"/> mins                                                                                                                                                                                                                                                                                                                                                                |                                                                                                                                                                                                                                                                                                                                                                                                                                                                                                                                                                                                                                                                                                                                                                                                                                                |
| Diagnosed by SN <input type="checkbox"/> MO <input type="checkbox"/> Other <input type="checkbox"/> Staff name _____ Signature _____                                                                                                                                                                                                                                                                                                                                                                                                                                                                                              |                                                                                                                                                                                                                                                                                                                                                                                                                                                                                                                                                                                                                                                                                                                                                                                                                                                |
| <b>Details of facility to which the woman is referred</b><br>Name _____ Location _____ District _____ Taluka _____                                                                                                                                                                                                                                                                                                                                                                                                                                                                                                                |                                                                                                                                                                                                                                                                                                                                                                                                                                                                                                                                                                                                                                                                                                                                                                                                                                                |
| Type CHC <input type="checkbox"/> TH <input type="checkbox"/> DH <input type="checkbox"/> Private <input type="checkbox"/> Other <input type="checkbox"/> (specify) _____                                                                                                                                                                                                                                                                                                                                                                                                                                                         |                                                                                                                                                                                                                                                                                                                                                                                                                                                                                                                                                                                                                                                                                                                                                                                                                                                |
| Person to contact _____ Telephone # _____                                                                                                                                                                                                                                                                                                                                                                                                                                                                                                                                                                                         |                                                                                                                                                                                                                                                                                                                                                                                                                                                                                                                                                                                                                                                                                                                                                                                                                                                |
| Date left PHC <input type="text"/> <input type="text"/> <input type="text"/> <input type="text"/> <input type="text"/> <input type="text"/> Time left PHC <input type="text"/> <input type="text"/> hrs <input type="text"/> <input type="text"/> mins                                                                                                                                                                                                                                                                                                                                                                            |                                                                                                                                                                                                                                                                                                                                                                                                                                                                                                                                                                                                                                                                                                                                                                                                                                                |
| Type of vehicle used for transportation 108 <input type="checkbox"/> Ambulance Govt <input type="checkbox"/> Ambulance Pvt <input type="checkbox"/> Other specify <input type="checkbox"/> _____                                                                                                                                                                                                                                                                                                                                                                                                                                  |                                                                                                                                                                                                                                                                                                                                                                                                                                                                                                                                                                                                                                                                                                                                                                                                                                                |
| <b>Outcome of referral</b> Discharged healthy <input type="checkbox"/> Died <input type="checkbox"/> Date <input type="text"/> <input type="text"/> <input type="text"/> <input type="text"/> <input type="text"/> <input type="text"/> Time <input type="text"/> <input type="text"/> hrs <input type="text"/> <input type="text"/> mins                                                                                                                                                                                                                                                                                         |                                                                                                                                                                                                                                                                                                                                                                                                                                                                                                                                                                                                                                                                                                                                                                                                                                                |

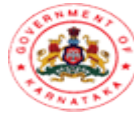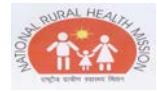

**COMPLICATION CASE SHEET G**

For initial management and referral of newborns with complications

Send a copy of the case sheet along with this sheet to the referral facility

|                                                                                                                                                                                                                                                                                                                                                                                                                                                                                                                                                                                                                                                                                                                                                                                                                                                                                                                                                                                                                                                                                                                                                                                                                                                                                                                                                                                                                                                                                                                                                                                                                                                                                                                                                                                                                                              |                                                                                                                                                                                                                                                                                                                                                                                                                                                                                                                                                                                                                                                                                                                                                                                                                                                                                                                                                                                                                                                                                                                                                                                                                                                                                                                                                                                                                                                                                                                                                                                                                                                                                                                                                                                                                           |  |  |  |  |  |  |  |  |  |  |
|----------------------------------------------------------------------------------------------------------------------------------------------------------------------------------------------------------------------------------------------------------------------------------------------------------------------------------------------------------------------------------------------------------------------------------------------------------------------------------------------------------------------------------------------------------------------------------------------------------------------------------------------------------------------------------------------------------------------------------------------------------------------------------------------------------------------------------------------------------------------------------------------------------------------------------------------------------------------------------------------------------------------------------------------------------------------------------------------------------------------------------------------------------------------------------------------------------------------------------------------------------------------------------------------------------------------------------------------------------------------------------------------------------------------------------------------------------------------------------------------------------------------------------------------------------------------------------------------------------------------------------------------------------------------------------------------------------------------------------------------------------------------------------------------------------------------------------------------|---------------------------------------------------------------------------------------------------------------------------------------------------------------------------------------------------------------------------------------------------------------------------------------------------------------------------------------------------------------------------------------------------------------------------------------------------------------------------------------------------------------------------------------------------------------------------------------------------------------------------------------------------------------------------------------------------------------------------------------------------------------------------------------------------------------------------------------------------------------------------------------------------------------------------------------------------------------------------------------------------------------------------------------------------------------------------------------------------------------------------------------------------------------------------------------------------------------------------------------------------------------------------------------------------------------------------------------------------------------------------------------------------------------------------------------------------------------------------------------------------------------------------------------------------------------------------------------------------------------------------------------------------------------------------------------------------------------------------------------------------------------------------------------------------------------------------|--|--|--|--|--|--|--|--|--|--|
| <b>A.BACKGROUND INFORMATION</b>                                                                                                                                                                                                                                                                                                                                                                                                                                                                                                                                                                                                                                                                                                                                                                                                                                                                                                                                                                                                                                                                                                                                                                                                                                                                                                                                                                                                                                                                                                                                                                                                                                                                                                                                                                                                              |                                                                                                                                                                                                                                                                                                                                                                                                                                                                                                                                                                                                                                                                                                                                                                                                                                                                                                                                                                                                                                                                                                                                                                                                                                                                                                                                                                                                                                                                                                                                                                                                                                                                                                                                                                                                                           |  |  |  |  |  |  |  |  |  |  |
| District _____ Taluka _____ PHC Location _____                                                                                                                                                                                                                                                                                                                                                                                                                                                                                                                                                                                                                                                                                                                                                                                                                                                                                                                                                                                                                                                                                                                                                                                                                                                                                                                                                                                                                                                                                                                                                                                                                                                                                                                                                                                               |                                                                                                                                                                                                                                                                                                                                                                                                                                                                                                                                                                                                                                                                                                                                                                                                                                                                                                                                                                                                                                                                                                                                                                                                                                                                                                                                                                                                                                                                                                                                                                                                                                                                                                                                                                                                                           |  |  |  |  |  |  |  |  |  |  |
| Name _____ Thaiy card number <table border="1" style="display: inline-table; border-collapse: collapse;"><tr><td style="width: 20px; height: 20px;"></td><td style="width: 20px; height: 20px;"></td></tr></table>                                                                                                                                                                                                                                                                                                                                                                                                                                                                                                                                                                                                                                                                                                                                                                                                                                                                                                                                                                                                                                                                                                                                                                                                                                                                                                                                                   |                                                                                                                                                                                                                                                                                                                                                                                                                                                                                                                                                                                                                                                                                                                                                                                                                                                                                                                                                                                                                                                                                                                                                                                                                                                                                                                                                                                                                                                                                                                                                                                                                                                                                                                                                                                                                           |  |  |  |  |  |  |  |  |  |  |
|                                                                                                                                                                                                                                                                                                                                                                                                                                                                                                                                                                                                                                                                                                                                                                                                                                                                                                                                                                                                                                                                                                                                                                                                                                                                                                                                                                                                                                                                                                                                                                                                                                                                                                                                                                                                                                              |                                                                                                                                                                                                                                                                                                                                                                                                                                                                                                                                                                                                                                                                                                                                                                                                                                                                                                                                                                                                                                                                                                                                                                                                                                                                                                                                                                                                                                                                                                                                                                                                                                                                                                                                                                                                                           |  |  |  |  |  |  |  |  |  |  |
| Address _____                                                                                                                                                                                                                                                                                                                                                                                                                                                                                                                                                                                                                                                                                                                                                                                                                                                                                                                                                                                                                                                                                                                                                                                                                                                                                                                                                                                                                                                                                                                                                                                                                                                                                                                                                                                                                                |                                                                                                                                                                                                                                                                                                                                                                                                                                                                                                                                                                                                                                                                                                                                                                                                                                                                                                                                                                                                                                                                                                                                                                                                                                                                                                                                                                                                                                                                                                                                                                                                                                                                                                                                                                                                                           |  |  |  |  |  |  |  |  |  |  |
| <b>B.SPECIFIC DIAGNOSIS AND INITIAL MANAGEMENT</b>                                                                                                                                                                                                                                                                                                                                                                                                                                                                                                                                                                                                                                                                                                                                                                                                                                                                                                                                                                                                                                                                                                                                                                                                                                                                                                                                                                                                                                                                                                                                                                                                                                                                                                                                                                                           | <b>THESE ARE ALL NEWBORN EMERGENCIES</b>                                                                                                                                                                                                                                                                                                                                                                                                                                                                                                                                                                                                                                                                                                                                                                                                                                                                                                                                                                                                                                                                                                                                                                                                                                                                                                                                                                                                                                                                                                                                                                                                                                                                                                                                                                                  |  |  |  |  |  |  |  |  |  |  |
| <b>Diagnosis (Tick as applicable a-f)</b>                                                                                                                                                                                                                                                                                                                                                                                                                                                                                                                                                                                                                                                                                                                                                                                                                                                                                                                                                                                                                                                                                                                                                                                                                                                                                                                                                                                                                                                                                                                                                                                                                                                                                                                                                                                                    | <b>Initial management at the PHC (Tick when management done)</b>                                                                                                                                                                                                                                                                                                                                                                                                                                                                                                                                                                                                                                                                                                                                                                                                                                                                                                                                                                                                                                                                                                                                                                                                                                                                                                                                                                                                                                                                                                                                                                                                                                                                                                                                                          |  |  |  |  |  |  |  |  |  |  |
| <p><b>a.</b> <input type="checkbox"/> Preterm birth &lt; 37 weeks gestation</p> <p><b>b.</b> <input type="checkbox"/> Low birth weight requiring referral (less than 1800 gms)</p> <p><b>c.</b> <input type="checkbox"/> <b>Asphyxia</b> (Tick as appropriate)<br/> <input type="checkbox"/> Not breathing after 30 secs bag and mask<br/> <input type="checkbox"/> APGAR &lt; 7 at 5 mins</p> <p><b>d.</b> <input type="checkbox"/> <b>Infection / Sepsis</b> (Tick as appropriate)<br/> <input type="checkbox"/> <b>Respiratory distress</b><br/> <input type="checkbox"/> Grunting <input type="checkbox"/> RR &gt;60 breaths/min<br/> <input type="checkbox"/> Severe chest indrawing <input type="checkbox"/> Nasal flaring<br/> <input type="checkbox"/> <b>Temperature instability</b><br/> <input type="checkbox"/> Temp <math>\geq 37.5^{\circ}\text{C}</math> or <math>\leq 35.5^{\circ}\text{C}</math><br/> <input type="checkbox"/> <b>Skin problems</b> - 10 or more skin pustules or big boil<br/> <input type="checkbox"/> <b>Abnormal activity</b><br/> <input type="checkbox"/> Convulsions <input type="checkbox"/> Lethargic or unconscious<br/> <input type="checkbox"/> Little movement <input type="checkbox"/> Floppy or stiff baby<br/> <input type="checkbox"/> <b>Feeding problems</b> – unable to feed<br/> <input type="checkbox"/> <b>Blue or pale baby</b></p> <p><b>e.</b> <input type="checkbox"/> <b>Birth anomalies (specify)</b> _____</p> <p><b>f. Others</b> (Tick as appropriate)<br/> <input type="checkbox"/> Jaundice <input type="checkbox"/> Bleeding from any site<br/> <input type="checkbox"/> No urine after 48 hrs <input type="checkbox"/> Abdominal distension<br/> <input type="checkbox"/> Persistent vomiting or diarrhea<br/> <input type="checkbox"/> <b>Other (specify)</b>.....</p> | <p><input type="checkbox"/> Call and determine the nearest facility for special newborn care</p> <p><input type="checkbox"/> Arrange transport</p> <p><input type="checkbox"/> Keep the baby warm, preferably using KMC</p> <p><b>Give fluids, either</b></p> <p><input type="checkbox"/> Breast milk/breastfeeding or</p> <p><input type="checkbox"/> 5ml/kg expressed breast milk by palladai or</p> <p><input type="checkbox"/> 5ml/kg expressed breast milk by OG tube or</p> <p><input type="checkbox"/> 5ml/kg of 10% Dextrose by palladai or</p> <p><input type="checkbox"/> 5ml/kg of 10% Dextrose by OG tube</p> <p><input type="checkbox"/> Give ventilation with bag and mask, and oxygen if necessary</p> <p><input type="checkbox"/> Chest compressions given (if trained)</p> <p><input type="checkbox"/> During transport, continue feeding and bag and mask, if necessary</p> <p><b>If you suspect infection give following antibiotics</b></p> <p><input type="checkbox"/> Ampicillin 50 mg/kg IM and</p> <p><input type="checkbox"/> Gentamicin 5 mg/kg IM</p> <p>Time antibiotics given <table border="1" style="display: inline-table; border-collapse: collapse;"><tr><td style="width: 20px; height: 20px;"></td><td style="width: 20px; height: 20px;"></td></tr></table> hrs <table border="1" style="display: inline-table; border-collapse: collapse;"><tr><td style="width: 20px; height: 20px;"></td><td style="width: 20px; height: 20px;"></td></tr></table> mins</p> <p>Reason if not given _____</p> <p><input type="checkbox"/> Check baby received vitamin K and if not, then give as follows</p> <p><input type="checkbox"/> 1 mg if weight &gt; 1500 gms</p> <p><input type="checkbox"/> 0.5 mg if weight <math>\leq</math> 1500 gms</p> <p><input type="checkbox"/> Given before</p> |  |  |  |  |  |  |  |  |  |  |
|                                                                                                                                                                                                                                                                                                                                                                                                                                                                                                                                                                                                                                                                                                                                                                                                                                                                                                                                                                                                                                                                                                                                                                                                                                                                                                                                                                                                                                                                                                                                                                                                                                                                                                                                                                                                                                              |                                                                                                                                                                                                                                                                                                                                                                                                                                                                                                                                                                                                                                                                                                                                                                                                                                                                                                                                                                                                                                                                                                                                                                                                                                                                                                                                                                                                                                                                                                                                                                                                                                                                                                                                                                                                                           |  |  |  |  |  |  |  |  |  |  |
|                                                                                                                                                                                                                                                                                                                                                                                                                                                                                                                                                                                                                                                                                                                                                                                                                                                                                                                                                                                                                                                                                                                                                                                                                                                                                                                                                                                                                                                                                                                                                                                                                                                                                                                                                                                                                                              |                                                                                                                                                                                                                                                                                                                                                                                                                                                                                                                                                                                                                                                                                                                                                                                                                                                                                                                                                                                                                                                                                                                                                                                                                                                                                                                                                                                                                                                                                                                                                                                                                                                                                                                                                                                                                           |  |  |  |  |  |  |  |  |  |  |
| <b>C. CONDITION AT THE TIME OF REFERRAL</b>                                                                                                                                                                                                                                                                                                                                                                                                                                                                                                                                                                                                                                                                                                                                                                                                                                                                                                                                                                                                                                                                                                                                                                                                                                                                                                                                                                                                                                                                                                                                                                                                                                                                                                                                                                                                  |                                                                                                                                                                                                                                                                                                                                                                                                                                                                                                                                                                                                                                                                                                                                                                                                                                                                                                                                                                                                                                                                                                                                                                                                                                                                                                                                                                                                                                                                                                                                                                                                                                                                                                                                                                                                                           |  |  |  |  |  |  |  |  |  |  |
| Activity Active <input type="checkbox"/> Lethargic <input type="checkbox"/> Irritable <input type="checkbox"/> Heart rate _____/min Respiratory rate _____/min                                                                                                                                                                                                                                                                                                                                                                                                                                                                                                                                                                                                                                                                                                                                                                                                                                                                                                                                                                                                                                                                                                                                                                                                                                                                                                                                                                                                                                                                                                                                                                                                                                                                               |                                                                                                                                                                                                                                                                                                                                                                                                                                                                                                                                                                                                                                                                                                                                                                                                                                                                                                                                                                                                                                                                                                                                                                                                                                                                                                                                                                                                                                                                                                                                                                                                                                                                                                                                                                                                                           |  |  |  |  |  |  |  |  |  |  |
| Temperature: _____ <sup>o</sup> C Other specify _____                                                                                                                                                                                                                                                                                                                                                                                                                                                                                                                                                                                                                                                                                                                                                                                                                                                                                                                                                                                                                                                                                                                                                                                                                                                                                                                                                                                                                                                                                                                                                                                                                                                                                                                                                                                        |                                                                                                                                                                                                                                                                                                                                                                                                                                                                                                                                                                                                                                                                                                                                                                                                                                                                                                                                                                                                                                                                                                                                                                                                                                                                                                                                                                                                                                                                                                                                                                                                                                                                                                                                                                                                                           |  |  |  |  |  |  |  |  |  |  |
| <b>D. REFERRAL DETAILS</b>                                                                                                                                                                                                                                                                                                                                                                                                                                                                                                                                                                                                                                                                                                                                                                                                                                                                                                                                                                                                                                                                                                                                                                                                                                                                                                                                                                                                                                                                                                                                                                                                                                                                                                                                                                                                                   |                                                                                                                                                                                                                                                                                                                                                                                                                                                                                                                                                                                                                                                                                                                                                                                                                                                                                                                                                                                                                                                                                                                                                                                                                                                                                                                                                                                                                                                                                                                                                                                                                                                                                                                                                                                                                           |  |  |  |  |  |  |  |  |  |  |
| Date diagnosis made <table border="1" style="display: inline-table; border-collapse: collapse;"><tr><td style="width: 20px; height: 20px;"></td><td style="width: 20px; height: 20px;"></td></tr></table> Time diagnosis made <table border="1" style="display: inline-table; border-collapse: collapse;"><tr><td style="width: 20px; height: 20px;"></td><td style="width: 20px; height: 20px;"></td></tr></table> hrs <table border="1" style="display: inline-table; border-collapse: collapse;"><tr><td style="width: 20px; height: 20px;"></td><td style="width: 20px; height: 20px;"></td></tr></table> mins                                                                                                                                                                                                                                                                                                                                                                                                                                                                                                                                                                                                                                                                                                                                                                                                                                                                                                                                                                                                                                           |                                                                                                                                                                                                                                                                                                                                                                                                                                                                                                                                                                                                                                                                                                                                                                                                                                                                                                                                                                                                                                                                                                                                                                                                                                                                                                                                                                                                                                                                                                                                                                                                                                                                                                                                                                                                                           |  |  |  |  |  |  |  |  |  |  |
|                                                                                                                                                                                                                                                                                                                                                                                                                                                                                                                                                                                                                                                                                                                                                                                                                                                                                                                                                                                                                                                                                                                                                                                                                                                                                                                                                                                                                                                                                                                                                                                                                                                                                                                                                                                                                                              |                                                                                                                                                                                                                                                                                                                                                                                                                                                                                                                                                                                                                                                                                                                                                                                                                                                                                                                                                                                                                                                                                                                                                                                                                                                                                                                                                                                                                                                                                                                                                                                                                                                                                                                                                                                                                           |  |  |  |  |  |  |  |  |  |  |
|                                                                                                                                                                                                                                                                                                                                                                                                                                                                                                                                                                                                                                                                                                                                                                                                                                                                                                                                                                                                                                                                                                                                                                                                                                                                                                                                                                                                                                                                                                                                                                                                                                                                                                                                                                                                                                              |                                                                                                                                                                                                                                                                                                                                                                                                                                                                                                                                                                                                                                                                                                                                                                                                                                                                                                                                                                                                                                                                                                                                                                                                                                                                                                                                                                                                                                                                                                                                                                                                                                                                                                                                                                                                                           |  |  |  |  |  |  |  |  |  |  |
|                                                                                                                                                                                                                                                                                                                                                                                                                                                                                                                                                                                                                                                                                                                                                                                                                                                                                                                                                                                                                                                                                                                                                                                                                                                                                                                                                                                                                                                                                                                                                                                                                                                                                                                                                                                                                                              |                                                                                                                                                                                                                                                                                                                                                                                                                                                                                                                                                                                                                                                                                                                                                                                                                                                                                                                                                                                                                                                                                                                                                                                                                                                                                                                                                                                                                                                                                                                                                                                                                                                                                                                                                                                                                           |  |  |  |  |  |  |  |  |  |  |
| Diagnosed by SN <input type="checkbox"/> MO <input type="checkbox"/> Other <input type="checkbox"/> Staff name _____ Signature _____                                                                                                                                                                                                                                                                                                                                                                                                                                                                                                                                                                                                                                                                                                                                                                                                                                                                                                                                                                                                                                                                                                                                                                                                                                                                                                                                                                                                                                                                                                                                                                                                                                                                                                         |                                                                                                                                                                                                                                                                                                                                                                                                                                                                                                                                                                                                                                                                                                                                                                                                                                                                                                                                                                                                                                                                                                                                                                                                                                                                                                                                                                                                                                                                                                                                                                                                                                                                                                                                                                                                                           |  |  |  |  |  |  |  |  |  |  |
| Details of facility to which the woman is referred                                                                                                                                                                                                                                                                                                                                                                                                                                                                                                                                                                                                                                                                                                                                                                                                                                                                                                                                                                                                                                                                                                                                                                                                                                                                                                                                                                                                                                                                                                                                                                                                                                                                                                                                                                                           |                                                                                                                                                                                                                                                                                                                                                                                                                                                                                                                                                                                                                                                                                                                                                                                                                                                                                                                                                                                                                                                                                                                                                                                                                                                                                                                                                                                                                                                                                                                                                                                                                                                                                                                                                                                                                           |  |  |  |  |  |  |  |  |  |  |
| Name _____ Location _____ District _____ Taluka _____                                                                                                                                                                                                                                                                                                                                                                                                                                                                                                                                                                                                                                                                                                                                                                                                                                                                                                                                                                                                                                                                                                                                                                                                                                                                                                                                                                                                                                                                                                                                                                                                                                                                                                                                                                                        |                                                                                                                                                                                                                                                                                                                                                                                                                                                                                                                                                                                                                                                                                                                                                                                                                                                                                                                                                                                                                                                                                                                                                                                                                                                                                                                                                                                                                                                                                                                                                                                                                                                                                                                                                                                                                           |  |  |  |  |  |  |  |  |  |  |
| Type CHC <input type="checkbox"/> TH <input type="checkbox"/> DH <input type="checkbox"/> Private <input type="checkbox"/> Other <input type="checkbox"/> (specify) _____                                                                                                                                                                                                                                                                                                                                                                                                                                                                                                                                                                                                                                                                                                                                                                                                                                                                                                                                                                                                                                                                                                                                                                                                                                                                                                                                                                                                                                                                                                                                                                                                                                                                    |                                                                                                                                                                                                                                                                                                                                                                                                                                                                                                                                                                                                                                                                                                                                                                                                                                                                                                                                                                                                                                                                                                                                                                                                                                                                                                                                                                                                                                                                                                                                                                                                                                                                                                                                                                                                                           |  |  |  |  |  |  |  |  |  |  |
| Person to contact _____ Telephone # _____                                                                                                                                                                                                                                                                                                                                                                                                                                                                                                                                                                                                                                                                                                                                                                                                                                                                                                                                                                                                                                                                                                                                                                                                                                                                                                                                                                                                                                                                                                                                                                                                                                                                                                                                                                                                    |                                                                                                                                                                                                                                                                                                                                                                                                                                                                                                                                                                                                                                                                                                                                                                                                                                                                                                                                                                                                                                                                                                                                                                                                                                                                                                                                                                                                                                                                                                                                                                                                                                                                                                                                                                                                                           |  |  |  |  |  |  |  |  |  |  |
| Date left PHC <table border="1" style="display: inline-table; border-collapse: collapse;"><tr><td style="width: 20px; height: 20px;"></td><td style="width: 20px; height: 20px;"></td></tr></table> Time left PHC <table border="1" style="display: inline-table; border-collapse: collapse;"><tr><td style="width: 20px; height: 20px;"></td><td style="width: 20px; height: 20px;"></td></tr></table> hrs <table border="1" style="display: inline-table; border-collapse: collapse;"><tr><td style="width: 20px; height: 20px;"></td><td style="width: 20px; height: 20px;"></td></tr></table> mins                                                                                                                                                                                                                                                                                                                                                                                                                                                                                                                                                                                                                                                                                                                                                                                                                                                                                                                                                                                                                                                       |                                                                                                                                                                                                                                                                                                                                                                                                                                                                                                                                                                                                                                                                                                                                                                                                                                                                                                                                                                                                                                                                                                                                                                                                                                                                                                                                                                                                                                                                                                                                                                                                                                                                                                                                                                                                                           |  |  |  |  |  |  |  |  |  |  |
|                                                                                                                                                                                                                                                                                                                                                                                                                                                                                                                                                                                                                                                                                                                                                                                                                                                                                                                                                                                                                                                                                                                                                                                                                                                                                                                                                                                                                                                                                                                                                                                                                                                                                                                                                                                                                                              |                                                                                                                                                                                                                                                                                                                                                                                                                                                                                                                                                                                                                                                                                                                                                                                                                                                                                                                                                                                                                                                                                                                                                                                                                                                                                                                                                                                                                                                                                                                                                                                                                                                                                                                                                                                                                           |  |  |  |  |  |  |  |  |  |  |
|                                                                                                                                                                                                                                                                                                                                                                                                                                                                                                                                                                                                                                                                                                                                                                                                                                                                                                                                                                                                                                                                                                                                                                                                                                                                                                                                                                                                                                                                                                                                                                                                                                                                                                                                                                                                                                              |                                                                                                                                                                                                                                                                                                                                                                                                                                                                                                                                                                                                                                                                                                                                                                                                                                                                                                                                                                                                                                                                                                                                                                                                                                                                                                                                                                                                                                                                                                                                                                                                                                                                                                                                                                                                                           |  |  |  |  |  |  |  |  |  |  |
|                                                                                                                                                                                                                                                                                                                                                                                                                                                                                                                                                                                                                                                                                                                                                                                                                                                                                                                                                                                                                                                                                                                                                                                                                                                                                                                                                                                                                                                                                                                                                                                                                                                                                                                                                                                                                                              |                                                                                                                                                                                                                                                                                                                                                                                                                                                                                                                                                                                                                                                                                                                                                                                                                                                                                                                                                                                                                                                                                                                                                                                                                                                                                                                                                                                                                                                                                                                                                                                                                                                                                                                                                                                                                           |  |  |  |  |  |  |  |  |  |  |
| Type of vehicle used for transportation 108 <input type="checkbox"/> Ambulance Govt <input type="checkbox"/> Ambulance Pvt <input type="checkbox"/> Other specify <input type="checkbox"/> _____                                                                                                                                                                                                                                                                                                                                                                                                                                                                                                                                                                                                                                                                                                                                                                                                                                                                                                                                                                                                                                                                                                                                                                                                                                                                                                                                                                                                                                                                                                                                                                                                                                             |                                                                                                                                                                                                                                                                                                                                                                                                                                                                                                                                                                                                                                                                                                                                                                                                                                                                                                                                                                                                                                                                                                                                                                                                                                                                                                                                                                                                                                                                                                                                                                                                                                                                                                                                                                                                                           |  |  |  |  |  |  |  |  |  |  |
| Outcome of referral Discharged healthy <input type="checkbox"/> Died <input type="checkbox"/> Date <table border="1" style="display: inline-table; border-collapse: collapse;"><tr><td style="width: 20px; height: 20px;"></td><td style="width: 20px; height: 20px;"></td></tr></table> Time <table border="1" style="display: inline-table; border-collapse: collapse;"><tr><td style="width: 20px; height: 20px;"></td><td style="width: 20px; height: 20px;"></td></tr></table> hrs <table border="1" style="display: inline-table; border-collapse: collapse;"><tr><td style="width: 20px; height: 20px;"></td><td style="width: 20px; height: 20px;"></td></tr></table> mins                                                                                                                                                                                                                                                                                                                                                                                                                                                                                                                                                                                                                                                                                                                                                                                                                                                                                                                                                                           |                                                                                                                                                                                                                                                                                                                                                                                                                                                                                                                                                                                                                                                                                                                                                                                                                                                                                                                                                                                                                                                                                                                                                                                                                                                                                                                                                                                                                                                                                                                                                                                                                                                                                                                                                                                                                           |  |  |  |  |  |  |  |  |  |  |
|                                                                                                                                                                                                                                                                                                                                                                                                                                                                                                                                                                                                                                                                                                                                                                                                                                                                                                                                                                                                                                                                                                                                                                                                                                                                                                                                                                                                                                                                                                                                                                                                                                                                                                                                                                                                                                              |                                                                                                                                                                                                                                                                                                                                                                                                                                                                                                                                                                                                                                                                                                                                                                                                                                                                                                                                                                                                                                                                                                                                                                                                                                                                                                                                                                                                                                                                                                                                                                                                                                                                                                                                                                                                                           |  |  |  |  |  |  |  |  |  |  |
|                                                                                                                                                                                                                                                                                                                                                                                                                                                                                                                                                                                                                                                                                                                                                                                                                                                                                                                                                                                                                                                                                                                                                                                                                                                                                                                                                                                                                                                                                                                                                                                                                                                                                                                                                                                                                                              |                                                                                                                                                                                                                                                                                                                                                                                                                                                                                                                                                                                                                                                                                                                                                                                                                                                                                                                                                                                                                                                                                                                                                                                                                                                                                                                                                                                                                                                                                                                                                                                                                                                                                                                                                                                                                           |  |  |  |  |  |  |  |  |  |  |
|                                                                                                                                                                                                                                                                                                                                                                                                                                                                                                                                                                                                                                                                                                                                                                                                                                                                                                                                                                                                                                                                                                                                                                                                                                                                                                                                                                                                                                                                                                                                                                                                                                                                                                                                                                                                                                              |                                                                                                                                                                                                                                                                                                                                                                                                                                                                                                                                                                                                                                                                                                                                                                                                                                                                                                                                                                                                                                                                                                                                                                                                                                                                                                                                                                                                                                                                                                                                                                                                                                                                                                                                                                                                                           |  |  |  |  |  |  |  |  |  |  |



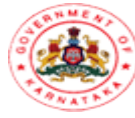

## COMPLICATION SHEET H

For initial management and referral of other maternal complication  
Send a copy of the case sheet along with this sheet to the referral facility

| A. BACKGROUND INFORMATION                                                                                                                                                                        |                                                                                                                                                                                                                                                                                        |
|--------------------------------------------------------------------------------------------------------------------------------------------------------------------------------------------------|----------------------------------------------------------------------------------------------------------------------------------------------------------------------------------------------------------------------------------------------------------------------------------------|
| District _____                                                                                                                                                                                   | Taluka _____ PHC Location _____                                                                                                                                                                                                                                                        |
| Name _____                                                                                                                                                                                       | Thayi card number <input type="text"/>                                                                         |
| Address _____                                                                                                                                                                                    |                                                                                                                                                                                                                                                                                        |
| Contact number                                                                                                                                                                                   | <input type="text"/>                                                                      |
| Date of admission                                                                                                                                                                                | <input type="text"/> Time of admission <input type="text"/> <input type="text"/> hrs <input type="text"/> <input type="text"/> mins |
| Date of delivery                                                                                                                                                                                 | <input type="text"/> Time of delivery <input type="text"/> <input type="text"/> hrs <input type="text"/> <input type="text"/> mins  |
| Date of referral                                                                                                                                                                                 | <input type="text"/> Time of referral <input type="text"/> <input type="text"/> hrs <input type="text"/> <input type="text"/> mins  |
| B. PARTICULARS OF REFERRAL                                                                                                                                                                       |                                                                                                                                                                                                                                                                                        |
| Provisional diagnosis: _____                                                                                                                                                                     |                                                                                                                                                                                                                                                                                        |
| Chief complaints: _____<br>_____                                                                                                                                                                 |                                                                                                                                                                                                                                                                                        |
| Summary of management (Pre-referral treatment/ procedures):<br>_____<br>_____<br>_____                                                                                                           |                                                                                                                                                                                                                                                                                        |
| Investigations: _____<br>_____                                                                                                                                                                   |                                                                                                                                                                                                                                                                                        |
| C. CONDITION AT THE TIME OF REFERRAL                                                                                                                                                             |                                                                                                                                                                                                                                                                                        |
| Consciousness: Conscious <input type="checkbox"/> Semiconscious <input type="checkbox"/> Unconscious <input type="checkbox"/>                                                                    | Pulse: _____/min BP: _____mmHg                                                                                                                                                                                                                                                         |
| Temperature: _____°C                                                                                                                                                                             | Respiration: _____/min Others specify _____                                                                                                                                                                                                                                            |
| D. REFERRAL COMMUNICATION AND TRANSPORT                                                                                                                                                          |                                                                                                                                                                                                                                                                                        |
| Date diagnosis made <input type="text"/> <input type="text"/> <input type="text"/> <input type="text"/> <input type="text"/> <input type="text"/>                                                | Time diagnosis made <input type="text"/> <input type="text"/> hrs <input type="text"/> <input type="text"/> mins                                                                                                                                                                       |
| Diagnosed by SN <input type="checkbox"/> MO <input type="checkbox"/> Other <input type="checkbox"/> Staff name _____                                                                             | Signature _____                                                                                                                                                                                                                                                                        |
| Details of facility to which the woman is referred                                                                                                                                               |                                                                                                                                                                                                                                                                                        |
| Name _____                                                                                                                                                                                       | Location _____ District _____ Taluka _____                                                                                                                                                                                                                                             |
| Type CHC <input type="checkbox"/> TH <input type="checkbox"/> DH <input type="checkbox"/> Private <input type="checkbox"/> Other <input type="checkbox"/> (specify) _____                        |                                                                                                                                                                                                                                                                                        |
| Person to contact _____                                                                                                                                                                          | Telephone # _____                                                                                                                                                                                                                                                                      |
| Date left PHC <input type="text"/> <input type="text"/> <input type="text"/> <input type="text"/> <input type="text"/> <input type="text"/>                                                      | Time left PHC <input type="text"/> <input type="text"/> hrs <input type="text"/> <input type="text"/> mins                                                                                                                                                                             |
| Type of vehicle used for transportation 108 <input type="checkbox"/> Ambulance Govt <input type="checkbox"/> Ambulance Pvt <input type="checkbox"/> Other specify <input type="checkbox"/> _____ |                                                                                                                                                                                                                                                                                        |
| Outcome of referral Discharged healthy <input type="checkbox"/> Died <input type="checkbox"/>                                                                                                    | Date <input type="text"/> <input type="text"/> <input type="text"/> <input type="text"/> <input type="text"/> <input type="text"/> Time <input type="text"/> <input type="text"/> hrs <input type="text"/> <input type="text"/> mins                                                   |
