# Supplementary material for: Nurse Mentors to Advance Quality Improvement in Primary Health Centers: Lessons From a Pilot Program in Northern Karnataka, India
Source: PubMed Central journal article supplement (PMC4682589; doi:10.9745/ghsp-d-15-00142), 2015-12-15
Supplement: GHSP-D-15-00142_15-00142-Fischer-Supplementary-Material-Self-Assessment-Checklists.pdf [file GHSP-D-15-00142_15-00142-Fischer-Supplementary-Material-Self-Assessment-Checklists.pdf]

# Self-assessment guides

## Project Sukshema – 24/7 PHC - Self Assessment guide

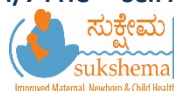

| A.Clients' Rights to Safe and Competent Care |                                                                                                                                                                                                                                                                                                       | Tick (✓) if Yes or fill 'X' |
|----------------------------------------------|-------------------------------------------------------------------------------------------------------------------------------------------------------------------------------------------------------------------------------------------------------------------------------------------------------|-----------------------------|
| 1.                                           | Do PHC clinical providers fully and accurately document the woman's history and details of lab tests, vaginal and pelvic exams on client case sheets?                                                                                                                                                 |                             |
| 2.                                           | Do PHC clinical providers fully and accurately document all complications (diagnosis and management) on the complications sheets?                                                                                                                                                                     |                             |
| 3.                                           | Do staff monitor and document the diagnosis of active labour and the process of labour fully and accurately on partographs?                                                                                                                                                                           |                             |
| 4.                                           | Do staff monitor all women and newborns post delivery and document on the case sheets?                                                                                                                                                                                                                |                             |
| 5.                                           | Do staff ensure that women in 2 <sup>nd</sup> stage of labour are never left alone?                                                                                                                                                                                                                   |                             |
| 6.                                           | Do all staff know how to assess, diagnose and manage women in shock?                                                                                                                                                                                                                                  |                             |
| 7.                                           | Do all staff know how to, and practice Active Management of third stage of labour (AMTSL) including appropriate use of oxytocin for delivery of the placenta (but NEVER for labour augmentation)?                                                                                                     |                             |
| 8.                                           | Are all staff able to recognize severe anaemia and refer when necessary?                                                                                                                                                                                                                              |                             |
| 9.                                           | Are all staff able to assess, diagnose and manage:<br>Prolonged rupture of membranes (PROM), obstructed and/or prolonged labour?                                                                                                                                                                      |                             |
| 10.                                          | Are all staff able to assess, diagnose and manage antepartum and postpartum haemorrhage?                                                                                                                                                                                                              |                             |
| 11.                                          | Are all staff able to take BP and assess, diagnose and manage pregnancy induced hypertension, pre-eclampsia and eclampsia?                                                                                                                                                                            |                             |
| 12.                                          | Do all staff know to, and practice administration of magnesium sulphate for convulsions?                                                                                                                                                                                                              |                             |
| 13.                                          | Are all staff able to assess, diagnose and manage pre-term labour or preterm prelabour rupture of membranes?                                                                                                                                                                                          |                             |
| 14.                                          | Do all staff know and practice administration of corticosteroids according to guidelines (how much, when and where) in pre-term labour for the prevention of neonatal respiratory distress?                                                                                                           |                             |
| 15.                                          | Are all staff able to assess, diagnose and manage the different causes of maternal sepsis?                                                                                                                                                                                                            |                             |
| 16.                                          | Do all staff know not to do episiotomies unless absolutely necessary and not to augment labour at a 24/7 PHC?                                                                                                                                                                                         |                             |
| 17.                                          | Do all staff know how to assess, diagnose and manage foetal distress?                                                                                                                                                                                                                                 |                             |
| 18.                                          | Do all staff know how to, and practice?<br>Immediate neonatal care, including bag/mask ventilation if resuscitation required; cord care; eye care; thermal protection and kangaroo mother care; immediate breastfeeding support; appropriate vaccinations and vitamin K for newborns before discharge |                             |
| 19.                                          | Are all staff able to assess, diagnose and manage prematurity and low birth weight?                                                                                                                                                                                                                   |                             |
| 20.                                          | Are all staff able to assess, diagnose and manage neonatal asphyxia?                                                                                                                                                                                                                                  |                             |
| 21.                                          | Are all staff able to assess, diagnose and manage newborn sepsis?                                                                                                                                                                                                                                     |                             |
| 22.                                          | Do all staff know how to help a woman to breastfeed and how to manage problems?                                                                                                                                                                                                                       |                             |
| 23.                                          | Do all staff know how, and practice all the steps, and timings of postpartum and what danger signs to look for? Newborn monitoring and what danger signs to look for?                                                                                                                                 |                             |
| 24.                                          | Do staff, before discharging postpartum clients, know how what advice to give new mothers about themselves and the newborn?                                                                                                                                                                           |                             |
| 25.                                          | Do staff know how to initiate a referral and communicate with the closest higher level for emergency obstetric or newborn services?                                                                                                                                                                   |                             |

### Comments

---



---

**Project Sukshema – 24/7 PHC - Self Assessment guide**

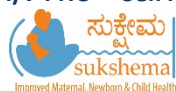

Improved Maternal, Newborn & Child Health

|    | <b>B.Staff's Right to Supplies, Equipment and Infrastructure</b>                                                                                                                                                                                                                                                                                                                                                                                                                                                                                                                                                                                                                                                                                                                                                                 | Tick (✓) if Yes or fill 'X' |
|----|----------------------------------------------------------------------------------------------------------------------------------------------------------------------------------------------------------------------------------------------------------------------------------------------------------------------------------------------------------------------------------------------------------------------------------------------------------------------------------------------------------------------------------------------------------------------------------------------------------------------------------------------------------------------------------------------------------------------------------------------------------------------------------------------------------------------------------|-----------------------------|
| 1. | Is there a good system for repair/maintenance of equipment, so services are not interrupted?                                                                                                                                                                                                                                                                                                                                                                                                                                                                                                                                                                                                                                                                                                                                     |                             |
| 2. | Is there a functional system for monitoring and ordering of drugs and supplies so services are not interrupted?                                                                                                                                                                                                                                                                                                                                                                                                                                                                                                                                                                                                                                                                                                                  |                             |
| 3. | Are the following available (in working order) in the exam room and labour room?<br>Exam table<br>Adjustable light<br>BP apparatus<br>Foetoscope<br>Speculum; Forceps (Cheatle and Sponge)<br>Case sheets<br>Registers<br>Partographs                                                                                                                                                                                                                                                                                                                                                                                                                                                                                                                                                                                            |                             |
| 4. | In the labour room, is there a newborn corner with:<br>Table or flat surface, Blanket or towel for warmth, Thermometer<br>Baby weigh scale<br>Radiant warmer<br>Neonatal ambu bag and mask (with different sized masks)<br>Oxygen, Nasal catheter, Mucus extractor, Cord ties/clamps<br>Clean dry blankets<br>Infant Stethoscope                                                                                                                                                                                                                                                                                                                                                                                                                                                                                                 |                             |
| 5. | Are all the following drugs available or readily accessible 24/7?<br>1. Anti-convulsants (magnesium sulphate) and calcium gluconate for drug reaction or diazepam (can be used for severe pre-eclampsia and eclampsia)<br>2. Uterotonics (oxytocin or misoprostol) for AMTSL (NOT for augmentation)<br>3. Anti PPH uterotonic (oxytocin)<br>4. Antibiotics (gentamycin, ampicillin, metronidazole) for sepsis/ sepsis prophylaxis<br>5. Cloxacillin, Erythromycin for breast abscess<br>6. Diazepam (for removal of retained placenta)<br>7. Methergin, carboprost or misoprostol for atonic uterus and delayed PPH<br>8. IV fluids/Ringer lactate<br>9. Anti-hypertensives (nifedipine or hydralazine)<br>10. Corticosteroids (betamethasone or dexamethasone)<br>11. Chlorhexidine<br>12. Vitamin K<br>13. All needed vaccines |                             |
| 6. | Are all infection prevention materials available?<br>Soap and running water<br>Surgical gloves<br>Utility gloves for cleaning instruments<br>Buckets with chlorine (0.5%, WITH LIDS), renewed every day<br>Sharps disposal containers<br>Waste buckets for medical and other waste                                                                                                                                                                                                                                                                                                                                                                                                                                                                                                                                               |                             |
| 7. | Is the pharmacy always ready, stocked, open for clients with complications 24/7?<br>Is there always an emergency tray with all needed drugs in the labour room?                                                                                                                                                                                                                                                                                                                                                                                                                                                                                                                                                                                                                                                                  |                             |

|     |                                                                                                                                                                                                                                                                                                                                                                                                                                         |  |
|-----|-----------------------------------------------------------------------------------------------------------------------------------------------------------------------------------------------------------------------------------------------------------------------------------------------------------------------------------------------------------------------------------------------------------------------------------------|--|
| 8.  | <p>Is the lab always ready, with staff and all reagents and equipment needed to perform basic tests 24/7?</p> <p>Haemoglobin<br/>         Urinalysis for sugar<br/>         Urinalysis for proteins<br/>         Urinalysis for bacterial infections<br/>         HIV tests<br/>         RPR/VDRL<br/>         HBsAg</p> <p>If the lab is closed, are staff able to access HIV rapid tests and urine dipsticks for protein testing?</p> |  |
| 9.  | <p>Is the instrument processing area fully equipped at all times with? Working autoclave or boiler, Deep sink and running water, Brushes, Detergent, Chlorine, Basins, Utility gloves</p>                                                                                                                                                                                                                                               |  |
| 10. | <p>Does the PHC have a deep pit for burying waste?</p>                                                                                                                                                                                                                                                                                                                                                                                  |  |
|     |                                                                                                                                                                                                                                                                                                                                                                                                                                         |  |
|     |                                                                                                                                                                                                                                                                                                                                                                                                                                         |  |

**Comments**

---



---



---

**Project Sukshema – 24/7 PHC - Self Assessment guide**

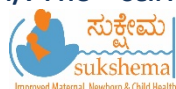

Improved Maternal, Newborn & Child Health

| <b>C. Clients' Rights to Access to Services and Continuity of Care</b> |                                                                                                                                                                                                                                                                                                                                                                                                                                                                                                                                                                                                                              | Tick (✓) if Yes or fill 'X' |
|------------------------------------------------------------------------|------------------------------------------------------------------------------------------------------------------------------------------------------------------------------------------------------------------------------------------------------------------------------------------------------------------------------------------------------------------------------------------------------------------------------------------------------------------------------------------------------------------------------------------------------------------------------------------------------------------------------|-----------------------------|
| 1.                                                                     | <p>Do clients have access to labour and delivery services 24 hours a day, 7 days a week available?</p> <ul style="list-style-type: none"> <li>• Qualified staff available to offer labour and delivery services (doctors, nurses, labs staff, pharmacist)?</li> <li>• Are there always supplies available to provide labour and delivery services?</li> <li>• Is there always emergency transportation service available for referrals?</li> </ul>                                                                                                                                                                           |                             |
| 2.                                                                     | Do staff minimize procedural and financial barriers to care for clients (e.g. requirement that clients obtain a male family member's permission to receive services, have easy access to services without having to pay or purchase supplies or drugs)?                                                                                                                                                                                                                                                                                                                                                                      |                             |
| 3.                                                                     | Are all obstetric clients in labour evaluated within 15 minutes of arrival at your facility?                                                                                                                                                                                                                                                                                                                                                                                                                                                                                                                                 |                             |
| 4.                                                                     | Do ANMs and ASHAs appropriately refer women with or without complications to the PHC?                                                                                                                                                                                                                                                                                                                                                                                                                                                                                                                                        |                             |
| 5.                                                                     | Do staff encourage all women to stay in the PHC for 48 hours post delivery?                                                                                                                                                                                                                                                                                                                                                                                                                                                                                                                                                  |                             |
| 6.                                                                     | <p>Are all nursing staff able to do the following always?</p> <ul style="list-style-type: none"> <li>• Set up an IV drip</li> <li>• IM Injection of oxytocin for AMTSL and PPH</li> <li>• Intravenous antibiotic administration</li> <li>• Inject IM magnesium sulphate</li> <li>• Repair a simple tear</li> </ul>                                                                                                                                                                                                                                                                                                           |                             |
| 7.                                                                     | <p>Are all necessary following things available?</p> <ul style="list-style-type: none"> <li>• Supplies (e.g. gloves, IV fluids, oxygen)</li> <li>• Drugs (e.g. antibiotics, anti-hypertensives, anti-convulsants, uterotonics)</li> <li>• Equipment available 24/7 without barriers (e.g. locked doors or cabinets or unavailable keys)</li> </ul>                                                                                                                                                                                                                                                                           |                             |
| 8.                                                                     | Does the facility have all needed recording sheets (case sheets and registers) and do all staff know what is expected of them in terms of recording?                                                                                                                                                                                                                                                                                                                                                                                                                                                                         |                             |
| 10.                                                                    | <p>Do staff do the following for women or babies who need referral??</p> <ol style="list-style-type: none"> <li>1. Provide or arrange transport within one hour of identification of need to refer?</li> <li>2. Communicate with the referral facility to inform them about the referral?</li> <li>3. Complete all paperwork about the person being referred including history, details of tests performed, drugs given, diagnosis?</li> <li>4. Know about and record the outcome of the person referred?</li> <li>5. Ensure the person referred is also then referred back to the ANM and ASHA in her community?</li> </ol> |                             |
|                                                                        |                                                                                                                                                                                                                                                                                                                                                                                                                                                                                                                                                                                                                              |                             |

**Comments:**

---



---

**Project Sukshema – 24/7 PHC - Self Assessment guide**

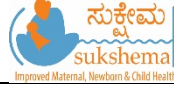

| <b>D.Clients' Rights to Infection-free Services</b> |                                                                                                                                                                                                                                    | Tick (✓) if Yes or fill 'X' |
|-----------------------------------------------------|------------------------------------------------------------------------------------------------------------------------------------------------------------------------------------------------------------------------------------|-----------------------------|
| 1.                                                  | Do staff ensure they do not do unnecessary procedures that can increase the risk of infection (e.g. too frequent vaginal exams, routine IV, routine episiotomy)                                                                    |                             |
| 2.                                                  | Do staff initiate treatment of all suspected or confirmed sepsis with ampicillin, gentamycin and metronidazole?                                                                                                                    |                             |
| 3.                                                  | Do staff wash their hands with soap and running water? <ul style="list-style-type: none"> <li>• Before each clinical procedure</li> <li>• After each clinical procedure</li> <li>• Before and after each client contact</li> </ul> |                             |
| 4.                                                  | Does your facility have the following protective wear for staff? Aprons, Caps, Eyewear, Face masks, Shoe covers/boots, Sterile gloves                                                                                              |                             |
| 5.                                                  | Do staff change gloves if they become contaminated (i.e. between clients and with the same client if glove gets contaminated)?                                                                                                     |                             |
| 6.                                                  | Between deliveries, do staff wipe the tables and contaminated surfaces in every room with 0.5% chlorine solution?                                                                                                                  |                             |
| 7.                                                  | Do staff know how to, and follow all correct steps of instrument processing? Instruments decontaminated immediately after use in 0.5% chlorine solution, Washed in running water, Sterilization or HLD; Drying, Storage            |                             |
| 8.                                                  | Do staff always ensure proper disposal of sharps in a puncture proof container?                                                                                                                                                    |                             |
| 9.                                                  | Do staff segregate and dispose of all medical waste (including bodily waste, swabs and sharps containers) according to guidelines?                                                                                                 |                             |
| 10.                                                 | Are the labour room, ward and toilets as clean as possible?                                                                                                                                                                        |                             |
|                                                     |                                                                                                                                                                                                                                    |                             |
|                                                     |                                                                                                                                                                                                                                    |                             |

**Comments**

---



---

**Project Sukshema – 24/7 PHC - Self Assessment guide**

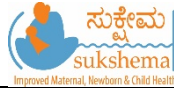

| <b>E. Staff's Right to Information, Training and Development</b> |                                                                                                                                                                                                                                                                                                                                               | Tick (✓) if Yes or fill 'X' |
|------------------------------------------------------------------|-----------------------------------------------------------------------------------------------------------------------------------------------------------------------------------------------------------------------------------------------------------------------------------------------------------------------------------------------|-----------------------------|
| 1.                                                               | Are current NRHM and SBA / NSSK guidelines available and accessible to all staff                                                                                                                                                                                                                                                              |                             |
| 2.                                                               | Are all staff trained to manage labour and deliveries as per SBA standards?                                                                                                                                                                                                                                                                   |                             |
| 3.                                                               | Are all staff trained to deal with pre-referral management of complications of labour and newborns?                                                                                                                                                                                                                                           |                             |
| 4.                                                               | Is a sufficient number of nursing staff trained to take <ul style="list-style-type: none"> <li>• BP</li> <li>• insert a Foley's catheter</li> <li>• administer IV fluids</li> <li>• administer antibiotics</li> <li>• administer oxytocin</li> <li>• administer magnesium sulphate</li> <li>• administer corticosteroids</li> </ul>           |                             |
| 5.                                                               | Is a sufficient number of staff trained, and ALWAYS available, to perform neonatal resuscitation?                                                                                                                                                                                                                                             |                             |
| 6.                                                               | Are all staff trained in infection prevention?                                                                                                                                                                                                                                                                                                |                             |
| 7.                                                               | Are all nursing staff trained and able to do: <ol style="list-style-type: none"> <li>1. urine dipstick tests for protein;</li> <li>2. HIV rapid tests</li> </ol>                                                                                                                                                                              |                             |
| 8.                                                               | Does the pharmacist: <ol style="list-style-type: none"> <li>A. Know what drugs are essential for labour</li> <li>B. Know what drugs are essential for delivery</li> <li>C. Ensure all emergency drugs are in the labour room during labour?</li> <li>D. Does s/he (and nurses) know what drugs (e.g. oxytocin) require cold chain?</li> </ol> |                             |
| 9.                                                               | Do all staff know the list of possible hospital options for referral of women who have complications that cannot be managed at the PHC and know how to refer?                                                                                                                                                                                 |                             |
|                                                                  |                                                                                                                                                                                                                                                                                                                                               |                             |
|                                                                  |                                                                                                                                                                                                                                                                                                                                               |                             |
|                                                                  |                                                                                                                                                                                                                                                                                                                                               |                             |
|                                                                  |                                                                                                                                                                                                                                                                                                                                               |                             |

**Comments**

---



---



---

**Project Sukshema – 24/7 PHC - Self Assessment guide**



|    | <b>F. Clients' Rights to Privacy, Confidentiality, Dignity, Comfort and Expression of Opinion</b>                                                                                                       | Tick (✓) if Yes or fill 'X' |
|----|---------------------------------------------------------------------------------------------------------------------------------------------------------------------------------------------------------|-----------------------------|
| 1. | Does each of the following areas offer visual and auditory privacy from other clients and staff?<br>1. Examination rooms<br>2. Labour and delivery rooms<br>3. Counselling areas                        |                             |
| 2. | Do staff keep body exposure to a minimum duration and extent during vaginal exams and delivery?                                                                                                         |                             |
| 3. | Do staff refrain from talking about clients with people who are not directly involved in their care?                                                                                                    |                             |
| 4. | When client records are not in use, do staff store them in a secure place (e.g. with access strictly limited to authorized staff)?                                                                      |                             |
| 5. | Is each of the following areas always clean and comfortable?<br>1. Examination rooms<br>2. Maternity wards<br>3. Labour and delivery rooms<br>4. Toilets<br>5. Waiting areas                            |                             |
| 6. | Does your PHC provide the following for clients and those who come with them?<br>1. Clean drinking water<br>2. Clean toilets<br>3. Nourishing food                                                      |                             |
| 7. | Do staff always provide pain medication for those that need it, and emotional support during labour and in the postpartum period?                                                                       |                             |
| 8. | Do staff provide counselling and emotional support to clients and their families in the case of complications such as?<br>A. maternal or foetal death<br>B. severe morbidity<br>C. foetal abnormalities |                             |
|    |                                                                                                                                                                                                         |                             |
|    |                                                                                                                                                                                                         |                             |
|    |                                                                                                                                                                                                         |                             |

**Comments**

---



---

**Project Sukshema – 24/7 PHC - Self Assessment guide**



| <b>G.Clients’ Rights to Information and Informed Choice</b> |                                                                                                                                                                                   | Tick (✓) if Yes or fill 'X' |
|-------------------------------------------------------------|-----------------------------------------------------------------------------------------------------------------------------------------------------------------------------------|-----------------------------|
| 1.                                                          | When clients with complications have been stabilized, do staff inform all clients and their families about the diagnosis, need for treatment or procedures and possible outcomes? |                             |
| 2.                                                          | Before discharging postpartum women and babies, do staff know about, and provide information on family planning?                                                                  |                             |
| 3.                                                          | Before discharging postpartum women and babies, do staff know about, and provide information on infant feeding and the importance of exclusive breastfeeding for 6 months?        |                             |
| 4.                                                          | Before discharging postpartum women and babies, do staff know about, and provide information on danger signs in the mother?                                                       |                             |
| 5.                                                          | Before discharging postpartum women and babies, do staff know about, and provide information on danger signs in the newborn?                                                      |                             |
| 6.                                                          | Before discharging postpartum women and babies, do staff provide information on how to contact the ANM and ASHA in her area?                                                      |                             |
| 7.                                                          | When a client is referred, do staff explain why it is important to go to a facility that can manage the complication?                                                             |                             |
|                                                             |                                                                                                                                                                                   |                             |
|                                                             |                                                                                                                                                                                   |                             |
|                                                             |                                                                                                                                                                                   |                             |

**Comments**

---



---



---



---



**Project Sukshema – 24/7 PHC - Self Assessment guide**



| <b>H.Staff's Right to Facilitative Supervision and Management and safe and secure work environment</b> |                                                                                                                                                                                                                                                                                                                                                                                                                                                                                                    | Tick (✓) if Yes or fill 'X' |
|--------------------------------------------------------------------------------------------------------|----------------------------------------------------------------------------------------------------------------------------------------------------------------------------------------------------------------------------------------------------------------------------------------------------------------------------------------------------------------------------------------------------------------------------------------------------------------------------------------------------|-----------------------------|
| 1.                                                                                                     | Do off-site supervisors or technical experts visit the facility regularly and do the following?:<br>1. Assess services<br>2. Recognize success<br>3. Work with staff to solve problems<br>4. Provide constructive feedback on clinical skills<br>5. Provide constructive feedback on general management of services<br>6. Provide information on government MNCH and SBA guidelines<br>7. Provide new knowledge through mini-trainings<br>8. Review management of complications of labour with you |                             |
| 2.                                                                                                     | Do you together, as staff, regularly assess the services you are providing (such as observing your infection prevention practices)?                                                                                                                                                                                                                                                                                                                                                                |                             |
| 3.                                                                                                     | Do you together, as staff, review emergency protocols?                                                                                                                                                                                                                                                                                                                                                                                                                                             |                             |
| 4.                                                                                                     | Do you together, as staff, review the following to assess your progress?<br><ul style="list-style-type: none"> <li>• case sheets</li> <li>• registers and records</li> </ul>                                                                                                                                                                                                                                                                                                                       |                             |
| 5.                                                                                                     | Does PHC management meet with staff regularly to discuss problems?                                                                                                                                                                                                                                                                                                                                                                                                                                 |                             |
| 6.                                                                                                     | Does PHC management encourage staff to work together as a team, respecting all staff and their roles (including ancillary staff, nurses, pharmacists, lab people, doctors, record keepers)?                                                                                                                                                                                                                                                                                                        |                             |
| 7.                                                                                                     | Does everyone have clear job descriptions and know their responsibilities?                                                                                                                                                                                                                                                                                                                                                                                                                         |                             |
| 8.                                                                                                     | Are referral protocols and referral facility contact information readily available and protocols understood by all staff?                                                                                                                                                                                                                                                                                                                                                                          |                             |
| 9.                                                                                                     | Is there a system for ensuring transport to a referral facility for clients 24 hours a day, 7 days a week that ensures transport within one hour?                                                                                                                                                                                                                                                                                                                                                  |                             |
| 10.                                                                                                    | Does the PHC keep and post on the wall a statistics chart with monthly information on?<br><ul style="list-style-type: none"> <li>• Number of deliveries</li> <li>• Number of referrals</li> </ul>                                                                                                                                                                                                                                                                                                  |                             |
| 11.                                                                                                    | Are all complicated cases and cases with poor outcomes (i.e. maternal or neonatal morbidity or mortality) regularly reviewed at staff meetings?                                                                                                                                                                                                                                                                                                                                                    |                             |
| 12.                                                                                                    | Does PHC management share information about the performance of the PHC (e.g. service statistics, findings from district quality team visits, etc.)?                                                                                                                                                                                                                                                                                                                                                |                             |
| 13.                                                                                                    | Are there well-functioning processes for determining staff schedules, managing coverage during leaves and absences, filling vacant positions?                                                                                                                                                                                                                                                                                                                                                      |                             |
| 14.                                                                                                    | Are there well-functioning processes for determining staff schedules, managing coverage during leaves and absences, filling vacant positions?                                                                                                                                                                                                                                                                                                                                                      |                             |
| 15.                                                                                                    | Are there adequate levels of security at the facility so that staff and patients feel safe at all hours?                                                                                                                                                                                                                                                                                                                                                                                           |                             |
| 16.                                                                                                    | Are there supportive systems and means of redressal in place if staff experience gender based violence or harassment at work?                                                                                                                                                                                                                                                                                                                                                                      |                             |

**Comments**

---



---
